# Supplementary material for: Ir-catalyzed chemo- and enantioselective hydrogenation of enyne-conjugated ketones
Source: Royal Society of Chemistry journal article supplement (doi:10.1039/d4qo01362j), 2024-01-01
Supplement: d4qo01362j1.pdf [file d4qo01362j1.pdf]

## Supporting Information

# Ir-Catalyzed Chemo- and Enantioselective Hydrogenation of Enyne-Conjugated Ketones

Xuejuan Zheng,<sup>a,b</sup> Fanping Huang,<sup>a</sup> Jianfei Yu,<sup>a</sup> Qiwei Lang<sup>a</sup>, Ya-Nan Duan<sup>d</sup>,  
Gen-Qiang Chen,<sup>c,\*</sup> Xumu Zhang<sup>a,d,\*</sup>

<sup>a</sup>*Medi-X Pingshan, Guangdong Provincial Key Laboratory of Catalysis, and Department of Chemistry, Southern University of Science and Technology, Shenzhen, 518000, People's Republic of China; <https://orcid.org/0000-0001-5700-0608>; Email: [zhangxm@sustech.edu.cn](mailto:zhangxm@sustech.edu.cn)*

<sup>b</sup>*Shenzhen Grubbs Institute, Department of Chemistry, Southern University of Science and Technology, Shenzhen, 518000, People's Republic of China*

<sup>c</sup>*Academy for Advanced Interdisciplinary Studies and Grubbs Institute, Southern University of Science and Technology, Shenzhen 518000, People's Republic of China; <https://orcid.org/0000-0003-2276-6800>; Email: [chengq@sustech.edu.cn](mailto:chengq@sustech.edu.cn)*

<sup>d</sup>*Chemistry and Chemical Engineering Guangdong Laboratory, Shantou 515031, China*

\*Corresponding author. E-mail address: [chengq@sustech.edu.cn](mailto:chengq@sustech.edu.cn); [zhangxm@sustech.edu.cn](mailto:zhangxm@sustech.edu.cn)

## Contents

|                                                                        |            |
|------------------------------------------------------------------------|------------|
| <b>I. General remarks.....</b>                                         | <b>S2</b>  |
| <b>II. Synthesis of substrates.....</b>                                | <b>S3</b>  |
| <b>III. General procedure for iridium catalyzed hydrogenation.....</b> | <b>S12</b> |
| <b>IV. Gram-scale reaction and transformation of products.....</b>     | <b>S29</b> |
| <b>V. NMR spectra of all the compounds.....</b>                        | <b>S32</b> |
| <b>VI. References.....</b>                                             | <b>S92</b> |

## I. General remarks

All the reactions dealing with air- or moisture- sensitive compounds were carried out under an atmosphere of argon in a glovebox or using standard Schlenk techniques in a reaction vessel which was dried by a heating gun. Unless otherwise noted, all the reagents were purchased from commercial suppliers without further purification. Solvents for the synthesis of substrates were distilled from sodium/benzophenone (THF, toluene) or calcium hydride (dichloromethane) under a N<sub>2</sub> atmosphere prior to use. Solvents for reaction condition screening were purchased from J&K Chemical and degassed through bubbling argon for 2 hours.

<sup>1</sup>H NMR, <sup>13</sup>C NMR spectra were obtained at room temperature on a Bruker AV400 MHz or Bruker AV600 MHz spectrometer with chemical shifts (δ) referred to the residual solvent signal. Chemical shifts were reported upfield to TMS (0.00 ppm) for <sup>1</sup>H NMR and relative to CDCl<sub>3</sub> (77.0 ppm) for <sup>13</sup>C NMR. Data were reported as: multiplicity (s= singlet, d= doublet, t= triplet, q= quartet, m= multiplet), coupling constant in herz (Hz) and signal area integration in natural numbers. Enantiomeric excess values were determined by Agilent 1290 Series HPLC instrument on a chiral stationary phase. Optical rotations were measured using 1 mL cell with a 1dm path length on a Rudolph Autopol I polarimeter at 589 nm. High resolution mass spectra (HRMS) were obtained on Thermo Scientific Q Exactive hybrid quadrupole-Orbitrap mass spectrometer. A positive ion mass spectrum of sample was acquired on a Thermo LTQ-FT mass spectrometer with an electrospray ionization source. Crystal structure was measured with BRUKER APEX III diffractometer.<sup>[1]</sup>

## II. Synthesis of substrates

### General procedure:

#### Procedure A: <sup>[1]</sup>

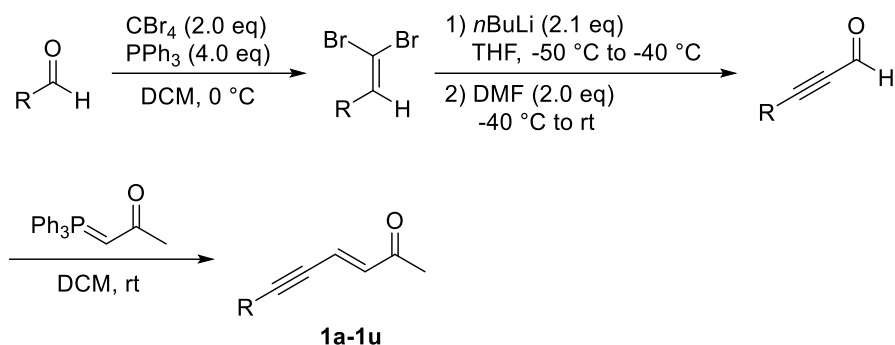

**Step 1:** A solution of triphenylphosphine (4.0 eq) and tetrabromomethane (2.0 eq) in DCM (0.15 M) was stirred at 0 °C for 30 minutes. The aldehyde was added and the mixture was stirred at 0 °C for another hour. After petroleum ether was added to the solution, the mixture was loaded on silica and subjected to flash chromatography (silica, petroleum ether), the *gem*-dibromoolefines were given after removing solvent under reduced pressure.

**Step 2:** Under an atmosphere of argon, *n*BuLi (2.1 eq., 2.5 M in *n*-hexane) was added over a period of 30 minutes *via* syringe pump to a solution of *gem*-dibromoolefine (1 eq.) in dry THF (0.4 M) at -50 °C, and the mixture was stirred at -40 °C for 15 minutes. After addition of DMF (2.0 eq.) at once, the mixture was allowed to warm to room temperature and stirred for one hour. The mixture was added to a stirring solution of NaH<sub>2</sub>PO<sub>4</sub> (aq.)/MTBE (1:1). After five minutes, the layers were separated and the aqueous layer was extracted with MTBE. The combined organic layers were dried over MgSO<sub>4</sub>, the solvent was removed under reduced pressure and the crude product was subjected to flash chromatography (silica, PE/EA = 90:10). The alkynyl aldehydes were given after removing the solvent under reduced pressure.

**Step 3:** A solution of aldehyde (1.0 eq.) and phosphine ylide (1.1 eq.) in dichloromethane (0.1 M) was stirred at room temperature for one hour. The solvent was removed under reduced pressure, the crude product was dry-loaded on silica and subjected to flash chromatography (silica, PE/EA = 90:10). The ketones were given after removing the solvent under reduced pressure.

#### Procedure B: <sup>[2, 3]</sup>

##### Synthesis of the $\alpha'$ -alkylation of 1-triphenylphosphoranylidene-propan-2-one

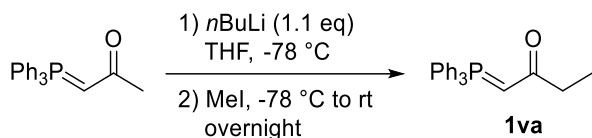

To a solution of 1-triphenylphosphoranylideneopropan-2-one (1.0 eq) in THF (0.125 M) was added at  $-78\text{ }^\circ\text{C}$   $n\text{BuLi}$  (1.1 eq., 2.5 M in  $n$ -hexane). The mixture was stirred at  $-78\text{ }^\circ\text{C}$  for one hour. After iodomethane (1.4 eq) was added, the mixture was allowed to warm to room temperature and stirred overnight. The solvent was removed in vacuo, the residue was taken up in DCM and the mixture was washed three times with  $\text{H}_2\text{O}$ , dried with  $\text{Na}_2\text{SO}_4$ , filtered and concentrated in vacuo. The off-white solid residue was washed with three portions of ice-cold ether and dried in vacuo to give product as slightly brown solid, which was used immediately in the next reaction without further purification.

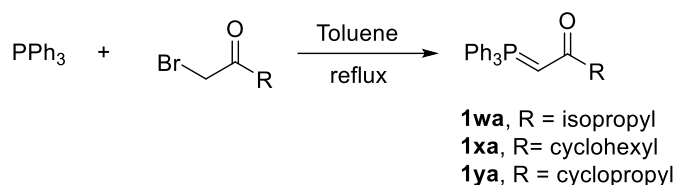

A solution of the 1-bromo-3-methylbutan-2-one (2.0 g, 12.1 mmol) and triphenylphosphine (3.2 g, 12.1 mmol) were refluxed in dry toluene (20 mL) for 4 h. After completion, the reaction mixture was allowed to cool to room temperature and the phosphonium salt was filtered and washed with  $\text{Et}_2\text{O}$  ( $3 \times 100\text{ mL}$ ). The phosphonium salt was then dissolved in  $\text{H}_2\text{O}$ : DCM (3:2) and 2 M NaOH aq. (100 mL) was added. The mixture was stirred for 2 h and then extracted with DCM ( $3 \times 100\text{ mL}$ ). The combined organic phases were washed with brine, dried with  $\text{Na}_2\text{SO}_4$  and concentrated in vacuo to afford **1wa** as a white solid. Compound **1xa** and **1ya** were prepared according to the same procedure for the synthesis of **1wa**.

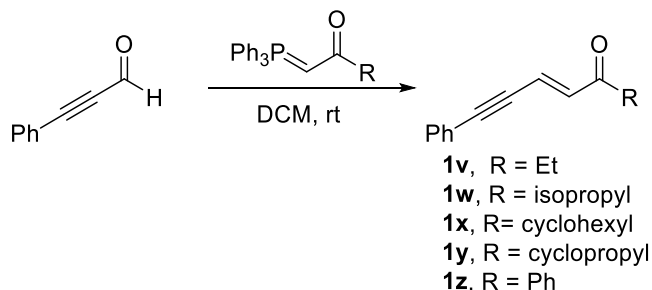

A solution of 3-phenylpropionaldehyde (1.0 eq.) and phosphine ylide (1.1 eq.) in dichloromethane (0.1 M) was stirred at room temperature for one hour. The solvent was removed under reduced pressure, the crude product was dry-loaded on silica and subjected to flash chromatography (silica, PE/EA =

90:10). The ketones (**1v-1z**) were given after removing the solvent under reduced pressure.

### Procedure C:<sup>[4]</sup>

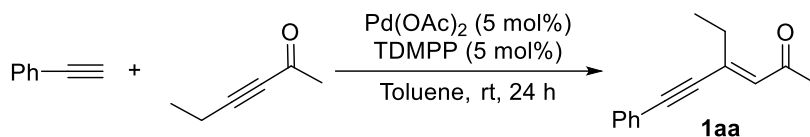

A 2-dram, screw-cap vial equipped with a stir bar was charged with Pd(OAc)<sub>2</sub> (22.4 mg, 0.10 mmol, 5 mol %) and tris(2,6-dimethoxyphenyl)phosphine (TDMPP, 44.2 mg, 0.10 mmol, 5 mol %). PhMe (2.0 mL) was added. The mixture was stirred for 15 minutes, generating a homogeneous, orange-red solution. To the solution was added 3-hexyn-2-one (328 μL, 3.0 mmol, 1.5 equivalents) followed by phenylacetylene (220 μL, 2.0 mmol, 1.0 equivalent). Upon addition of the donor alkyne, the reaction quickly changes in appearance to homogeneous and black. The reaction mixture was stirred for 14 h, at which point it was filtered through a pipette plug of Florisil® (3 cm), which was rinsed with Et<sub>2</sub>O (10 mL). The solution was concentrated, and the residue was purified via column chromatography (10:1 hexanes: EtOAc) to afford **1aa** (300.0 mg, 76%) as a clear, orange oil.

### (E)-6-Phenylhex-3-en-5-yn-2-one (**1a**)<sup>[1]</sup>

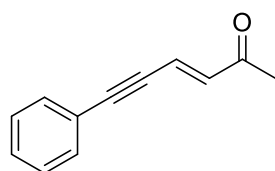

Light yellow solid, 89% yield, 3.8 g. <sup>1</sup>H NMR (600 MHz, CDCl<sub>3</sub>): δ 7.50-7.47 (m, 2H), 7.38-7.33 (m, 3H), 6.83 (d, *J* = 16.0 Hz, 1H), 6.57 (d, *J* = 16.0 Hz, 1H), 2.30 (s, 3H). <sup>13</sup>C NMR (151 MHz, CDCl<sub>3</sub>): δ 197.08, 137.79, 132.00, 129.45, 128.52, 123.83, 122.16, 99.69, 86.71, 27.69.

HRMS (EI) *m/z* calcd. for C<sub>12</sub>H<sub>11</sub>O ([M+H]<sup>+</sup>): 171.0805. Found: 171.0805.

### (E)-6-(4-Fluorophenyl)hex-3-en-5-yn-2-one (**1b**)<sup>[1]</sup>

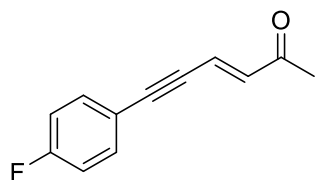

Light yellow solid, 60% yield, 1.1 g. <sup>1</sup>H NMR (600 MHz, CDCl<sub>3</sub>): δ 7.47 (dd, *J* = 8.7, 5.4 Hz, 2H), 7.05 (t, *J* = 8.6 Hz, 2H), 6.81 (d, *J* = 16.1 Hz, 1H), 6.56 (d, *J* = 16.1 Hz, 1H), 2.30 (s, 3H). <sup>13</sup>C NMR (151 MHz, CDCl<sub>3</sub>): δ 196.99, 163.16 (d, *J* = 250.6 Hz), 137.78, 134.04 (d,

*J* = 8.5 Hz, 2C), 123.58, 118.28 (d, *J* = 3.3 Hz), 115.93 (d, *J* = 22.8 Hz, 2C), 98.51, 86.50, 27.72. <sup>19</sup>F NMR (376 MHz, CDCl<sub>3</sub>): δ -108.63- -108.73 (m). HRMS (EI) *m/z* Calcd. for C<sub>12</sub>H<sub>10</sub>FO ([M+H]<sup>+</sup>): 189.0710. Found: 189.0710.

**(E)-6-(4-Chlorophenyl)hex-3-en-5-yn-2-one (1c)** <sup>[5]</sup>

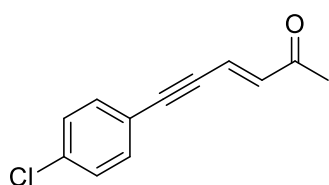

Light brown solid, 36% yield, 0.74 g. <sup>1</sup>H NMR (600 MHz, CDCl<sub>3</sub>): δ 7.42-7.39 (m, 2H), 7.35-7.32 (m, 2H), 6.81 (d, *J* = 16.0 Hz, 1H), 6.57 (d, *J* = 16.0 Hz, 1H), 2.31 (s, 3H). <sup>13</sup>C NMR (151 MHz, CDCl<sub>3</sub>): δ 196.94, 138.03, 135.63, 133.18, 128.93, 123.39, 120.63, 98.25, 87.56,

27.77. HRMS (EI) *m/z* Calcd. for C<sub>12</sub>H<sub>10</sub>ClO ([M+H]<sup>+</sup>): 205.0416. Found: 205.0416.

**(E)-6-(*p*-Tolyl)hex-3-en-5-yn-2-one (1d)** <sup>[5]</sup>

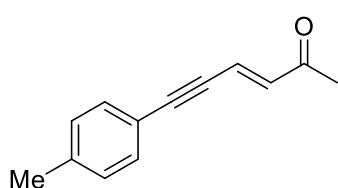

Light yellow solid, 60% yield, 1.1 g. <sup>1</sup>H NMR (600 MHz, CDCl<sub>3</sub>): δ 7.37 (d, *J* = 7.9 Hz, 2H), 7.16 (d, *J* = 7.7 Hz, 2H), 6.83 (dd, *J* = 16.1, 2.0 Hz, 1H), 6.54 (dd, *J* = 16.0, 2.0 Hz, 1H), 2.36 (s, 3H), 2.29 (d, *J* = 1.9 Hz, 3H). <sup>13</sup>C NMR (151 MHz, CDCl<sub>3</sub>): δ 197.13, 139.90,

137.42, 131.95, 129.31, 124.08, 119.09, 100.22, 86.33, 27.64, 21.62. HRMS (EI) *m/z* Calcd. for C<sub>13</sub>H<sub>13</sub>O ([M+H]<sup>+</sup>): 185.0962. Found: 185.0961.

**(E)-6-(4-(Trifluoromethyl)phenyl)hex-3-en-5-yn-2-one (1e)** <sup>[1]</sup>

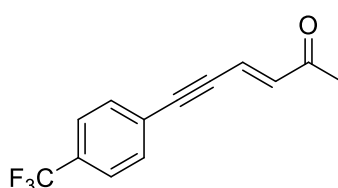

Dark brown solid, 33% yield, 0.8 g. <sup>1</sup>H NMR (600 MHz, CDCl<sub>3</sub>): δ 7.61 (d, *J* = 8.2 Hz, 2H), 7.58 (d, *J* = 8.2 Hz, 2H), 6.82 (d, *J* = 16.1 Hz, 1H), 6.61 (d, *J* = 16.1 Hz, 1H), 2.32 (s, 3H). <sup>13</sup>C NMR (151 MHz, CDCl<sub>3</sub>): δ 196.80, 138.67, 132.18 (s, 2C), 130.96 (dd, *J* = 32.7

Hz, 32.7 Hz), 125.90, 125.45 (dd, *J* = 4.3, 3.3 Hz, 2C), 124.64, 122.90, 97.36, 88.57, 27.84. <sup>19</sup>F NMR (376 MHz, CDCl<sub>3</sub>): δ -62.98 (s). HRMS (EI) *m/z* Calcd. for C<sub>13</sub>H<sub>10</sub>F<sub>3</sub>O ([M+H]<sup>+</sup>): 239.0684. Found: 239.0684.

**(E)-6-(4-Methoxyphenyl)hex-3-en-5-yn-2-one (1f)** <sup>[5]</sup>

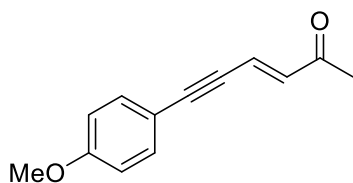

Light yellow solid, 61% yield, 1.2 g. <sup>1</sup>H NMR (600 MHz, CDCl<sub>3</sub>): δ 7.44-7.40 (m, 2H), 6.88-6.85 (m, 2H), 6.83 (d, *J* = 16.0 Hz, 1H), 6.52 (d, *J* = 16.0 Hz, 1H), 3.82 (s, 3H), 2.29 (s, 3H). <sup>13</sup>C NMR (151 MHz, CDCl<sub>3</sub>): δ 197.16, 160.61, 136.93, 133.72, 124.25,

114.22, 114.20, 100.42, 86.02, 55.37, 27.61. HRMS (EI) *m/z* Calcd. for C<sub>13</sub>H<sub>13</sub>O<sub>2</sub> ([M+H]<sup>+</sup>): 201.0910. Found: 201.0910.

**(E)-6-(3-Fluorophenyl)hex-3-en-5-yn-2-one (1g)**<sup>[6]</sup>

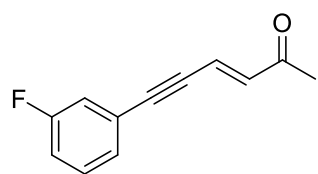

Brown oil, 53% yield, 3.8 g. <sup>1</sup>H NMR (600 MHz, CDCl<sub>3</sub>): δ 7.32 (td, *J* = 7.9, 5.8 Hz, 1H), 7.28-7.24 (m, 1H), 7.17 (ddd, *J* = 9.3, 2.6, 1.4 Hz, 1H), 7.08 (tdd, *J* = 8.4, 2.6, 1.0 Hz, 1H), 6.81 (d, *J* = 16.1 Hz, 1H), 6.58 (d, *J* = 16.1 Hz, 1H), 2.31 (d, *J* = 1.1 Hz, 3H). <sup>13</sup>C NMR (151 MHz, CDCl<sub>3</sub>): δ 196.90, 162.34 (d, *J* = 247.4 Hz), 138.32, 130.15 (d, *J* = .8 Hz), 127.8 (d, *J* = 2.8 Hz), 123.94 (d, *J* = 9.5 Hz), 123.21, 118.68 (d, *J* = 22.3 Hz), 116.79 (d, *J* = 21.7 Hz), 97.85 (d, *J* = 3.3 Hz), 87.32, 27.78. <sup>19</sup>F NMR (376 MHz, CDCl<sub>3</sub>): δ -112.36 (td, *J* = 8.9, 5.8 Hz). HRMS (EI) *m/z* Calcd. for C<sub>12</sub>H<sub>10</sub>FO ([M+H]<sup>+</sup>): 189.0710. Found: 189.0710.

**(E)-6-(3-Chlorophenyl)hex-3-en-5-yn-2-one (1h)**

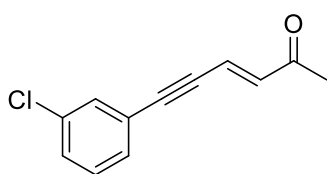

Light yellow solid, 37% yield, 0.8 g. <sup>1</sup>H NMR (600 MHz, CDCl<sub>3</sub>): δ 7.43 (t, *J* = 1.9 Hz, 1H), 7.32 (ddt, *J* = 7.8, 6.3, 1.4 Hz, 2H), 7.27-7.23 (m, 1H), 6.77 (d, *J* = 16.1 Hz, 1H), 6.54 (d, *J* = 16.0 Hz, 1H), 2.27 (d, *J* = 2.0 Hz, 3H). <sup>13</sup>C NMR (151 MHz, CDCl<sub>3</sub>): δ 196.87, 138.34, 134.39, 131.73, 130.07, 129.75, 129.65, 123.84, 123.16, 119.85, 97.66, 87.59, 27.78. HRMS (EI) *m/z* Calcd. for C<sub>12</sub>H<sub>10</sub>ClO ([M+H]<sup>+</sup>): 205.0416. Found: 205.0416.

**(E)-6-(3-(Trifluoromethyl)phenyl)hex-3-en-5-yn-2-one (1i)**

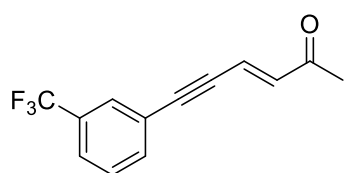

Light yellow solid, 15% yield, 0.4 g. <sup>1</sup>H NMR (600 MHz, CDCl<sub>3</sub>): δ 7.74 (d, *J* = 1.8 Hz, 1H), 7.67-7.61 (m, 2H), 7.49 (t, *J* = 7.8 Hz, 1H), 6.82 (d, *J* = 16.1 Hz, 1H), 6.61 (d, *J* = 16.1 Hz, 1H), 2.32 (s, 3H). <sup>13</sup>C NMR (151 MHz, CDCl<sub>3</sub>): δ 196.83, 138.54, 134.97, 131.20 (q, *J* = 32.8 Hz), 129.09, 128.72 (q, *J* = 3.9 Hz), 125.89 (q, *J* = 3.7 Hz), 123.56 (d, *J* = 273.5 Hz), 123.11, 122.95, 97.31, 87.86, 27.84. <sup>19</sup>F NMR (376 MHz, CDCl<sub>3</sub>): δ -63.04. HRMS (EI) *m/z* Calcd. for C<sub>13</sub>H<sub>10</sub>F<sub>3</sub>O ([M+H]<sup>+</sup>): 239.0684. Found: 239.0684.

**(E)-6-(3-Methoxyphenyl)hex-3-en-5-yn-2-one (1j)**<sup>[1]</sup>

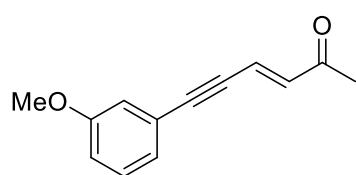

Light yellow solid, 53% yield, 1.0 g. <sup>1</sup>H NMR (600 MHz, CDCl<sub>3</sub>): δ 7.28-7.24 (m, 1H), 7.08 (dt, *J* = 7.6, 1.3 Hz, 1H), 7.00 (dd, *J* = 2.7, 1.4 Hz, 1H), 6.93 (ddt, *J* = 8.3, 2.5, 1.2 Hz, 1H), 6.82 (dd, *J* = 16.0, 1.4 Hz, 1H), 6.57 (dd, *J* = 16.1, 1.4 Hz, 1H), 3.81 (d, *J* = 1.6 Hz, 3H), 2.30 (d, *J* = 2.2 Hz, 3H). <sup>13</sup>C NMR (151 MHz, CDCl<sub>3</sub>): δ 197.05, 159.40, 137.87, 129.60, 124.56,

123.74, 123.10, 116.66, 116.10, 99.57, 86.48, 55.33, 27.70. HRMS (EI)  $m/z$  Calcd. for  $C_{13}H_{13}O_2$  ( $[M+H]^+$ ): 201.0910. Found: 201.0910.

**(E)-6-(2-Fluorophenyl)hex-3-en-5-yn-2-one (1k)**

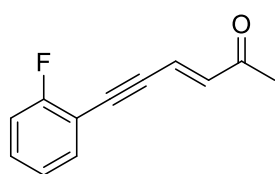

Light yellow solid, 36% yield, 0.7 g.  $^1H$  NMR (600 MHz,  $CDCl_3$ ):  $\delta$  7.46 (td,  $J = 7.4, 1.8$  Hz, 1H), 7.36 (dddd,  $J = 8.4, 7.2, 5.3, 1.8$  Hz, 1H), 7.15-7.07 (m, 2H), 6.84 (d,  $J = 16.1$  Hz, 1H), 6.60 (d,  $J = 16.1$  Hz, 1H), 2.30 (s, 3H).  $^{13}C$  NMR (151 MHz,  $CDCl_3$ ):  $\delta$  196.94, 162.77 (d,  $J = 253.4$  Hz), 138.27, 133.70, 131.29 (d,  $J = 7.9$  Hz), 124.17 (d,  $J = 3.8$  Hz), 123.27, 115.71 (d,  $J = 20.7$  Hz), 110.91 (d,  $J = 15.6$  Hz), 92.57, 91.42 (d,  $J = 3.3$  Hz), 27.75.  $^{19}F$  NMR (376 MHz,  $CDCl_3$ ):  $\delta$  -108.81 (dt,  $J = 9.4, 6.0$  Hz). HRMS (EI)  $m/z$  Calcd. for  $C_{12}H_{10}FO$  ( $[M+H]^+$ ): 189.0710. Found: 189.0710.

**(E)-6-(2-Chlorophenyl)hex-3-en-5-yn-2-one (1l)**<sup>[1]</sup>

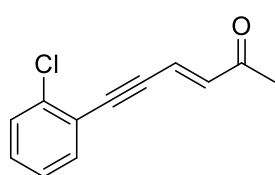

Light yellow oil, 39% yield, 0.8 g.  $^1H$  NMR (600 MHz,  $CDCl_3$ ):  $\delta$  7.51 (dd,  $J = 7.7, 1.7$  Hz, 1H), 7.45-7.41 (m, 1H), 7.31 (td,  $J = 7.8, 1.7$  Hz, 1H), 7.27-7.23 (m, 1H), 6.87 (d,  $J = 16.1$  Hz, 1H), 6.62 (d,  $J = 16.2$  Hz, 1H), 2.32 (s, 3H).  $^{13}C$  NMR (151 MHz,  $CDCl_3$ ):  $\delta$  195.91, 137.42, 135.31, 132.64, 129.41, 128.46, 125.59, 122.26, 121.15, 94.77, 90.34, 26.70. HRMS (EI)  $m/z$  Calcd. for  $C_{12}H_{10}ClO$  ( $[M+H]^+$ ): 205.0416. Found: 205.0416.

**(E)-6-(2-Methoxyphenyl)hex-3-en-5-yn-2-one (1m)**

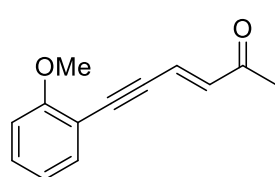

Light yellow oil, 45% yield, 0.9 g.  $^1H$  NMR (600 MHz,  $CDCl_3$ ):  $\delta$  7.43 (dd,  $J = 7.6, 1.7$  Hz, 1H), 7.38-7.32 (m, 1H), 6.94 (td,  $J = 7.5, 1.1$  Hz, 1H), 6.89 (td,  $J = 7.5, 1.1$  Hz, 1H), 6.88 (d,  $J = 16.1$  Hz, 1H), 6.57 (d,  $J = 16.1$  Hz, 1H), 3.90 (s, 3H), 2.30 (s, 3H).  $^{13}C$  NMR (151 MHz,  $CDCl_3$ ):  $\delta$  197.21, 160.32, 137.52, 133.95, 131.13, 124.24, 120.61, 111.37, 110.76, 96.48, 90.76, 55.84, 27.57. HRMS (EI)  $m/z$  Calcd. for  $C_{13}H_{13}O_2$  ( $[M+H]^+$ ): 201.0910. Found: 201.0910.

**(E)-6-(2,3-Dimethoxyphenyl)hex-3-en-5-yn-2-one (1n)**

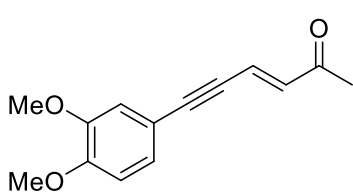

Light yellow solid, 29% yield, 0.7 g.  $^1H$  NMR (600 MHz,  $CDCl_3$ ):  $\delta$  7.11 (dt,  $J = 8.3, 1.3$  Hz, 1H), 6.97 (d,  $J = 1.9$  Hz, 1H), 6.84 (d,  $J = 1.9$  Hz, 1H), 6.82 (dd,  $J = 16.0, 0.9$  Hz, 1H), 6.53 (dd,  $J = 16.0, 0.9$  Hz, 1H), 3.90 (s, 3H), 3.89 (s, 3H), 2.29 (s, 3H).  $^{13}C$  NMR (151 MHz,  $CDCl_3$ ):  $\delta$  197.12, 150.54, 148.77, 137.04, 125.85, 124.07, 114.46, 114.25, 111.07, 100.45, 85.87,



55.95 (s, 2C), 27.66. HRMS (EI) m/z Calcd. for C<sub>14</sub>H<sub>15</sub>O<sub>3</sub> ([M+H]<sup>+</sup>): 231.1016. Found: 231.1015.

**(E)-6-(Benzo[d][1,3]dioxol-5-yl)hex-3-en-5-yn-2-one (1o)**

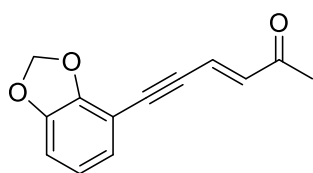

Light yellow solid, 54% yield, 1.2 g. <sup>1</sup>H NMR (600 MHz, CDCl<sub>3</sub>): δ 6.90 (ddt, *J* = 7.8, 3.0, 1.4 Hz, 1H), 6.86 – 6.81 (m, 2H), 6.79 (tdd, *J* = 7.8, 3.4, 1.3 Hz, 1H), 6.58 (ddd, *J* = 16.1, 3.5, 1.4 Hz, 1H), 6.03 (dd, *J* = 3.5, 1.4 Hz, 2H), 2.29 (dd, *J* = 3.3, 1.4 Hz, 3H). <sup>13</sup>C NMR (151 MHz, CDCl<sub>3</sub>): δ 196.93, 148.95, 147.62, 138.01, 124.88, 123.36, 121.79, 109.80, 103.90, 101.56, 93.39, 90.56, 27.72. HRMS (EI) m/z Calcd. for C<sub>13</sub>H<sub>11</sub>O<sub>3</sub> ([M+H]<sup>+</sup>): 215.0702. Found: 215.0703.

**(E)-6-(Naphthalen-1-yl)hex-3-en-5-yn-2-one (1p)**<sup>[1]</sup>

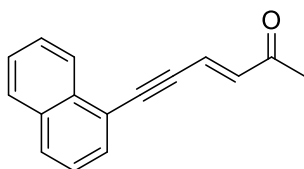

Bronw oil, 55% yield, 1.2 g. <sup>1</sup>H NMR (600 MHz, CDCl<sub>3</sub>): δ 8.29 (dd, *J* = 8.2, 1.3 Hz, 1H), 7.91-7.85 (m, 2H), 7.73 (dd, *J* = 7.2, 1.2 Hz, 1H), 7.61 (ddd, *J* = 8.3, 6.8, 1.3 Hz, 1H), 7.57 – 7.53 (m, 1H), 7.46 (dd, *J* = 8.3, 7.1 Hz, 1H), 6.99 (d, *J* = 16.1 Hz, 1H), 6.69 (d, *J* = 16.0 Hz, 1H), 2.35 (s, 3H). <sup>13</sup>C NMR (151 MHz, CDCl<sub>3</sub>): δ 197.08, 137.81, 133.16, 131.44, 130.13, 128.47, 127.23, 126.73, 126.72, 125.88, 125.27, 123.84, 119.77, 97.90, 91.55, 27.75. HRMS (EI) m/z Calcd. for C<sub>16</sub>H<sub>12</sub>O ([M+H]<sup>+</sup>): 221.0960. Found: 221.0960.

**(E)-6-(Naphthalen-2-yl)hex-3-en-5-yn-2-one (1q)**<sup>[1]</sup>

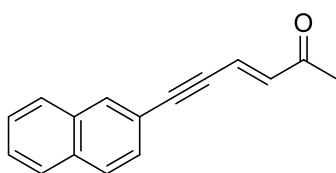

Light yellow solid, 57% yield, 1.3 g. <sup>1</sup>H NMR (600 MHz, CDCl<sub>3</sub>): δ 8.03 (d, *J* = 1.6 Hz, 1H), 7.86 – 7.79 (m, 3H), 7.52 (tdd, *J* = 8.4, 6.6, 1.8 Hz, 3H), 6.89 (d, *J* = 16.0 Hz, 1H), 6.62 (d, *J* = 16.0 Hz, 1H), 2.33 (s, 3H). <sup>13</sup>C NMR (151 MHz, CDCl<sub>3</sub>): δ 197.09, 137.81, 133.32, 132.86, 132.49, 128.27, 128.17, 128.02, 127.84, 127.36, 126.83, 123.86, 119.41, 100.19, 87.08, 27.73. HRMS (EI) m/z Calcd. for C<sub>16</sub>H<sub>12</sub>O ([M+H]<sup>+</sup>): 221.0960. Found: 221.0960.

**(E)-6-(Thiophen-2-yl)hex-3-en-5-yn-2-one (1r)**<sup>[1]</sup>

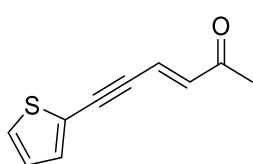

Yellow oil, 2% yield, 0.3 g. <sup>1</sup>H NMR (600 MHz, CDCl<sub>3</sub>): δ 7.38 (dt, *J* = 5.1, 0.9 Hz, 1H), 7.31 (dd, *J* = 3.5, 1.1 Hz, 1H), 7.03 (dd, *J* = 5.1, 3.7 Hz, 1H), 6.83 (d, *J* = 16.0 Hz, 1H), 6.55 (d, *J* = 16.0 Hz, 1H), 2.30 (s, 3H). <sup>13</sup>C NMR (151 MHz, CDCl<sub>3</sub>): δ 196.87, 137.06, 133.74, 129.38, 127.49, 123.31, 122.11, 93.04, 91.01, 27.80. HRMS (EI) m/z Calcd. for C<sub>10</sub>H<sub>9</sub>OS ([M+H]<sup>+</sup>): 177.0368. Found: 177.0368.

**(E)-6-Cyclohexylhex-3-en-5-yn-2-one (1s)** [7]

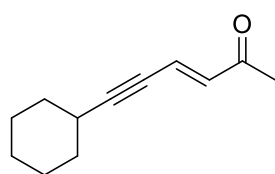

Yellow oil, 61% yield, 1.0 g. <sup>1</sup>H NMR (600 MHz, CDCl<sub>3</sub>): δ 6.62 (dt, *J* = 16.0, 1.6 Hz, 1H), 6.40 (dd, *J* = 16.1, 1.2 Hz, 1H), 2.55 (d, *J* = 10.0 Hz, 1H), 2.24 (d, *J* = 1.1 Hz, 3H), 1.86-1.79 (m, 2H), 1.72-1.67 (m, 2H), 1.55-1.43 (m, 3H), 1.32 (tt, *J* = 9.9, 4.0 Hz, 3H). <sup>13</sup>C NMR (151 MHz, CDCl<sub>3</sub>): δ 197.45, 137.38, 125.11, 106.38, 78.22, 32.21, 30.09, 27.39, 25.75, 24.78. HRMS (EI) *m/z* Calcd. for C<sub>12</sub>H<sub>17</sub>O ([M+H]<sup>+</sup>): 177.1274. Found: 177.1274.

**(E)-6-Cyclopentylhex-3-en-5-yn-2-one (1t)** [1]

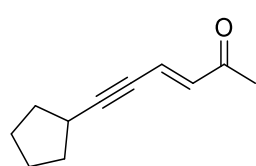

Yellow oil, 25% yield, 0.4 g. <sup>1</sup>H NMR (600 MHz, CDCl<sub>3</sub>): δ 6.61 (dd, *J* = 16.1, 2.2 Hz, 1H), 6.39 (d, *J* = 16.1 Hz, 1H), 2.79 (pd, *J* = 7.6, 2.3 Hz, 1H), 2.24 (s, 3H), 1.96 (dq, *J* = 10.9, 5.7, 2.3 Hz, 2H), 1.78-1.70 (m, 2H), 1.67-1.62 (m, 2H), 1.58 (ddt, *J* = 10.0, 7.4, 3.7 Hz, 2H). <sup>13</sup>C NMR (151 MHz, CDCl<sub>3</sub>): δ 197.45, 137.27, 125.15, 106.70, 77.82, 33.61, 31.11, 27.40, 25.07. HRMS (EI) *m/z* Calcd. for C<sub>11</sub>H<sub>15</sub>O ([M+H]<sup>+</sup>): 163.1118. Found: 163.1118.

**(E)-Tridec-3-en-5-yn-2-one (1u)**

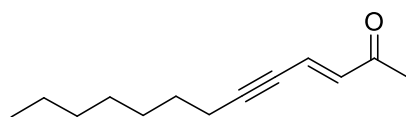

Yellow oil, 52% yield, 1.0 g. <sup>1</sup>H NMR (600 MHz, CDCl<sub>3</sub>): δ 6.60 (dt, *J* = 16.0, 2.3 Hz, 1H), 6.40 (d, *J* = 16.0 Hz, 1H), 2.38 (td, *J* = 7.1, 2.3 Hz, 2H), 2.24 (s, 3H), 1.55 (p, *J* = 7.2 Hz, 2H), 1.39 (dd, *J* = 10.9, 5.0 Hz, 2H), 1.32-1.25 (m, 6H), 0.88 (t, *J* = 6.7 Hz, 3H). <sup>13</sup>C NMR (151 MHz, CDCl<sub>3</sub>): δ 197.45, 137.47, 125.04, 102.57, 78.26, 31.69, 28.84, 28.75, 28.31, 27.40, 22.61, 19.88, 14.07. HRMS (EI) *m/z* Calcd. for C<sub>13</sub>H<sub>21</sub>O ([M+H]<sup>+</sup>): 193.1588. Found: 193.1589.

**(E)-7-Phenylhept-4-en-6-yn-3-one (1v)**

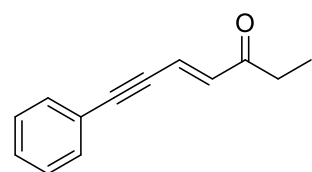

Yellow oil, 89% yield, 1.6 g. <sup>1</sup>H NMR (600 MHz, CDCl<sub>3</sub>): δ 7.55 – 7.45 (m, 2H), 7.42-7.31 (m, 3H), 6.87 (d, *J* = 16.0 Hz, 1H), 6.61 (d, *J* = 15.9 Hz, 1H), 2.60 (q, *J* = 7.3 Hz, 2H), 1.14 (t, *J* = 7.3 Hz, 3H). <sup>13</sup>C NMR (151 MHz, CDCl<sub>3</sub>): δ 199.62, 136.73, 131.99, 129.36, 128.50, 122.75, 122.24, 98.90, 86.99, 34.39, 7.97. HRMS (EI) *m/z* Calcd. for C<sub>13</sub>H<sub>12</sub>O ([M+H]<sup>+</sup>): 185.0961. Found: 185.0961.

**(E)-2-Methyl-7-phenylhept-4-en-6-yn-3-one (1w)**

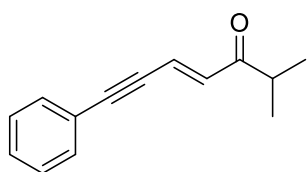

Yellow oil, 45% yield, 0.5 g.  $^1\text{H}$  NMR (400 MHz,  $\text{CDCl}_3$ ):  $\delta$  7.41 (dd,  $J = 7.4, 2.2$  Hz, 2H), 7.33-7.23 (m, 3H), 6.85 (d,  $J = 15.8$  Hz, 1H), 6.63 (d,  $J = 15.8$  Hz, 1H), 2.71 (p,  $J = 6.9$  Hz, 1H), 1.08 (d,  $J = 6.9$  Hz, 6H).  $^{13}\text{C}$  NMR (101 MHz,  $\text{CDCl}_3$ ):  $\delta$  202.33, 135.31, 132.00, 129.33, 128.50, 123.00, 122.29, 98.59, 87.28, 39.60, 18.14. HRMS (EI)  $m/z$  Calcd. for  $\text{C}_{14}\text{H}_{15}\text{O}$  ( $[\text{M}+\text{H}]^+$ ): 199.1118. Found: 199.1118.

**(E)-1-cyclohexyl-5-phenylpent-2-en-4-yn-1-one (1x)**

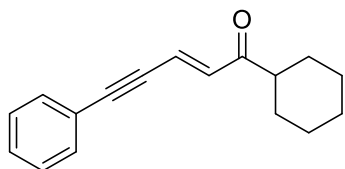

Exact Mass: 239.1430

Light yellow solid, 60% yield,  $^1\text{H}$  NMR (600 MHz, Chloroform- $d$ )  $\delta$  7.48 (d,  $J = 5.6$  Hz, 2H), 7.35 (q,  $J = 6.9, 6.4$  Hz, 3H), 6.90 (d,  $J = 15.8$  Hz, 1H), 6.70 (d,  $J = 15.8$  Hz, 1H), 2.52 (tt,  $J = 11.3, 3.4$  Hz, 1H), 1.88 (d,  $J = 17.1$  Hz, 2H), 1.81 (d,  $J = 12.8$  Hz, 2H), 1.69 (d,  $J = 12.6$  Hz, 1H), 1.45 – 1.17 (m, 5H).  $^{13}\text{C}$  NMR (151 MHz, Chloroform- $d$ )  $\delta$  201.71, 135.62, 131.99, 129.30, 128.49, 122.82, 122.32, 98.51, 87.34, 49.52, 28.40, 25.85, 25.66. HRMS (EI)  $m/z$  Calcd. for  $\text{C}_{17}\text{H}_{19}\text{O}$  ( $[\text{M}+\text{H}]^+$ ): 239.1430. Found: 239.1431.

**(E)-1-cyclopropyl-5-phenylpent-2-en-4-yn-1-one (1z)**

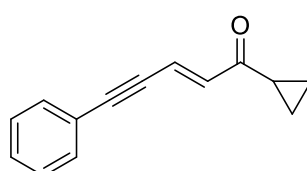

White solid, 52% yield, 1.0 g.  $^1\text{H}$  NMR (600 MHz,  $\text{CDCl}_3$ ):  $\delta$  7.51-7.47 (m, 2H), 7.37-7.35 (m, 2H), 6.90 (d,  $J = 15.9$  Hz, 1H), 6.73 (d,  $J = 15.9$  Hz, 1H), 2.10 (tt,  $J = 7.8, 4.5$  Hz, 1H), 1.15 (dt,  $J = 4.5, 3.4$  Hz, 2H), 0.98 (dq,  $J = 7.3, 3.7$  Hz, 2H).  $^{13}\text{C}$  NMR (151 MHz,  $\text{CDCl}_3$ ):  $\delta$  198.92, 137.00, 132.01, 129.34, 128.50, 122.48, 122.30, 98.81, 87.19, 20.02, 11.64. HRMS (EI)  $m/z$  Calcd. for  $\text{C}_{14}\text{H}_{13}\text{O}$  ( $[\text{M}+\text{H}]^+$ ): 197.0962. Found: 197.0961.

**(E)-4-ethyl-6-phenylhex-3-en-5-yn-2-one (1aa)** <sup>[4]</sup>

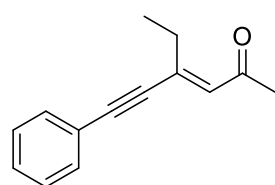

Orange oil, 76% yield, 0.3 g.  $^1\text{H}$  NMR (600 MHz,  $\text{CDCl}_3$ )  $\delta$  7.50-7.46 (m, 2H), 7.35 (q,  $J = 3.9$  Hz, 3H), 6.50 (s, 1H), 2.81 (q,  $J = 7.5$  Hz, 2H), 2.24 (s, 3H), 1.21 (t,  $J = 7.5$  Hz, 3H).  $^{13}\text{C}$  NMR (151 MHz,  $\text{CDCl}_3$ )  $\delta$  197.71, 142.90, 131.96, 130.06, 129.07, 128.45, 122.43, 94.81, 90.56, 31.93, 25.83, 12.90. HRMS (EI)  $m/z$  Calcd. for  $\text{C}_{14}\text{H}_{15}\text{O}$  ( $[\text{M}+\text{H}]^+$ ): 199.1117. Found: 199.1117.

### III. General procedure for iridium catalyzed hydrogenation

**General procedure for the asymmetric hydrogenation at S/C = 1 000:** To a 2.5 mL vial was added the catalyst precursor  $[\text{Ir}(\text{COD})\text{Cl}]_2$  (3.4 mg, 0.005 mmol), ligands (L1-L5, 0.011 mmol) and anhydrous *i*PrOH (1.0 mL) under argon atmosphere. The mixture was stirred for 3 h at 25 °C giving orange red solution in the argon-filled glovebox. The resulting solution (10  $\mu\text{L}$ ) transferred by syringe into a 3.0 mL vial charged with fresh distilled substrate (0.1 mmol) and  $\text{Cs}_2\text{CO}_3$  (0.001 mmol, 0.33 mg) in 1.0 mL *i*PrOH. The vials were transferred to an autoclave, which was then charged with 50 atm of  $\text{H}_2$  and stirred at room temperature for 16 h. The hydrogen gas was released slowly in a well-ventilated hood and the solution was concentrated and passed through a short column of silica gel to get the product. The yield was determined by  $^1\text{H}$  NMR analysis. The product was analyzed by chiral HPLC for ee values.

#### (*E*)-6-(3-Methoxyphenyl)hex-3-en-5-yn-2-ol (**2a**) [8]

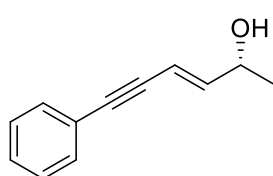

Brown oil, 99% yield, 93% ee;  $[\alpha]_{\text{D}}^{25} = +13.50$  ( $c = 1.0$ ,  $\text{CHCl}_3$ ). The enantiomeric excess was determined by HPLC on OJ-H column, hexane:isopropanol = 95:5; flow rate = 0.9 mL/min; UV detection at 220 nm;  $t_{\text{R}} = 40.67$  min (minor), 42.88 min (major).  $^1\text{H}$  NMR (600 MHz,  $\text{CDCl}_3$ )  $\delta$  7.43 (dd,  $J = 6.4, 3.0$  Hz, 2H), 7.31 (dd,  $J = 5.2, 2.0$  Hz, 3H), 6.27 (dd,  $J = 15.9, 5.7$  Hz, 1H), 5.93 (dd,  $J = 15.9, 1.6$  Hz, 1H), 4.49-4.36 (m, 1H), 1.60 (br, 1H), 1.33 (d,  $J = 6.4$  Hz, 3H).  $^{13}\text{C}$  NMR (151 MHz,  $\text{CDCl}_3$ )  $\delta$  146.62, 131.52, 128.32, 128.22, 123.24, 109.24, 90.14, 87.26, 68.35, 23.08. HRMS (EI)  $m/z$  Calcd. for  $\text{C}_{12}\text{H}_{11}$  ( $[\text{M}+\text{H}-\text{H}_2\text{O}]^+$ ): 155.0855. Found: 155.0855.

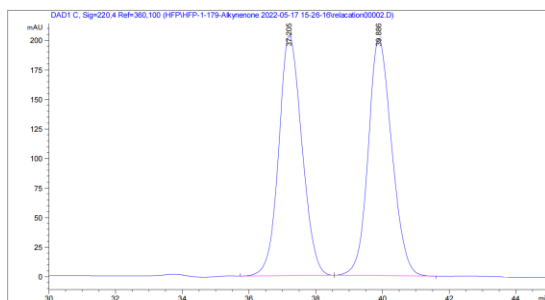

Signal 1: DAD1 C, Sig=220,4 Ref=360,100

| Peak # | RetTime [min] | Type | Width [min] | Area [mAU*s] | Height [mAU] | Area %  |
|--------|---------------|------|-------------|--------------|--------------|---------|
| 1      | 37.205        | BB   | 0.7420      | 9790.67480   | 203.23193    | 49.8759 |
| 2      | 39.886        | BB   | 0.7563      | 9839.38672   | 200.59166    | 50.1241 |

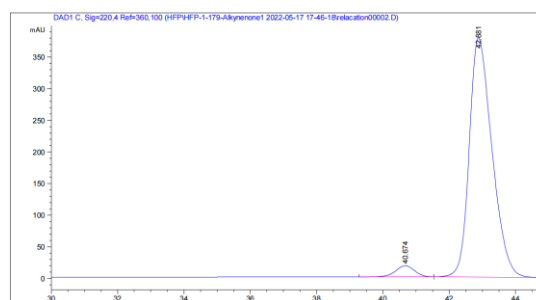

Signal 1: DAD1 C, Sig=220,4 Ref=360,100

| Peak # | RetTime [min] | Type | Width [min] | Area [mAU*s] | Height [mAU] | Area %  |
|--------|---------------|------|-------------|--------------|--------------|---------|
| 1      | 40.674        | BB   | 0.6102      | 696.12860    | 17.49568     | 3.7198  |
| 2      | 42.881        | BB   | 0.7274      | 1.80180e4    | 378.47845    | 96.2802 |

**(E)-6-(4-Fluorophenyl)hex-3-en-5-yn-2-ol (2b)** [9]

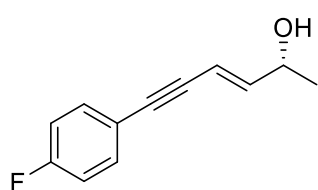

Brown oil, 90% yield, 91% ee;  $[\alpha]_D^{25} = +3.00$  ( $c = 1.0$ ,  $\text{CHCl}_3$ ). The enantiomeric excess was determined by HPLC on OJ-H column, hexane: isopropanol = 95:5; flow rate = 0.9 mL/min; UV detection at 254 nm;  $t_R = 29.24$  min (minor), 32.17 min (major).  $^1\text{H}$  NMR (600 MHz,  $\text{CDCl}_3$ ):  $\delta$  7.43-7.39 (m, 2H), 7.03-6.98 (m, 2H), 6.27 (dd,  $J = 15.9, 5.8$  Hz, 1H), 5.91 (dd,  $J = 15.9, 1.5$  Hz, 1H), 4.42 (t,  $J = 6.6$  Hz, 1H), 1.80 (br, 1H), 1.33 (d,  $J = 6.5$  Hz, 3H).  $^{13}\text{C}$  NMR (101 MHz,  $\text{CDCl}_3$ ):  $\delta$  162.46 ( $J = 249.2$  Hz), 146.71, 133.37 ( $J = 8.0$  Hz), 119.35 ( $J = 3.7$  Hz), 115.61 ( $J = 22.0$  Hz), 109.04, 89.04, 86.96, 68.30, 23.08.  $^{19}\text{F}$  NMR (376 MHz,  $\text{CDCl}_3$ ):  $\delta$  -111.01 (dd,  $J = 9.8, 4.9$  Hz). HRMS (EI)  $m/z$  Calcd. for  $\text{C}_{12}\text{H}_{10}\text{F}$  ( $[\text{M}+\text{H}-\text{H}_2\text{O}]^+$ ): 173.0761. Found: 173.0761.

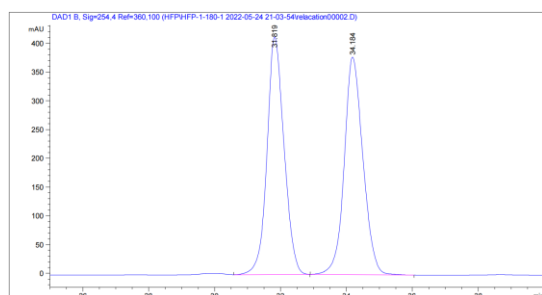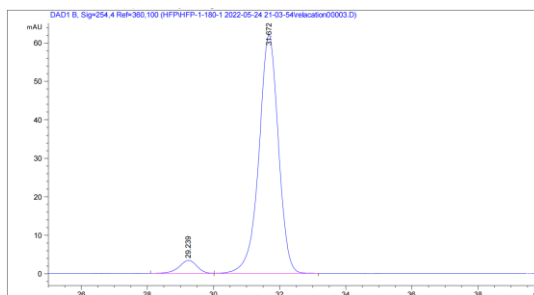

Signal 1: DAD1 B, Sig=254,4 Ref=360,100

| Peak # | RetTime [min] | Type | Width [min] | Area [mAU*s] | Height [mAU] | Area %  |
|--------|---------------|------|-------------|--------------|--------------|---------|
| 1      | 31.819        | BB   | 0.5433      | 1.48398e4    | 412.93991    | 49.8630 |
| 2      | 34.184        | BB   | 0.5982      | 1.49213e4    | 378.25098    | 50.1370 |

Signal 1: DAD1 B, Sig=254,4 Ref=360,100

| Peak # | RetTime [min] | Type | Width [min] | Area [mAU*s] | Height [mAU] | Area %  |
|--------|---------------|------|-------------|--------------|--------------|---------|
| 1      | 29.239        | BB   | 0.5506      | 126.26639    | 3.37378      | 4.7576  |
| 2      | 31.672        | BB   | 0.6240      | 2527.74023   | 61.95370     | 95.2424 |

**(E)-6-(4-Chlorophenyl)hex-3-en-5-yn-2-ol (2c)**

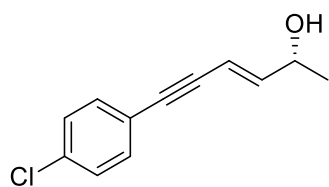

Light yellow solid, 95% yield, 90% ee;  $[\alpha]_D^{25} = +6.40$  ( $c = 1.0$ ,  $\text{CHCl}_3$ ). The enantiomeric excess was determined by HPLC on OJ-H column, hexane: isopropanol = 95:5; flow rate = 0.9 mL/min; UV detection at 254 nm;  $t_R = 28.45$  min (minor), 30.85 min (major).  $^1\text{H}$  NMR (400 MHz,  $\text{CDCl}_3$ ):  $\delta$  7.38-7.33 (m, 2H), 7.30-7.26 (m, 2H), 6.27 (dd,  $J = 15.9, 5.7$  Hz, 1H), 5.91 (dd,  $J = 15.9, 1.4$  Hz, 1H), 4.41 (pd,  $J = 6.4, 1.5$  Hz, 1H), 1.68 (br, 1H), 1.33 (d,  $J = 6.4$  Hz, 3H).  $^{13}\text{C}$  NMR (101 MHz,  $\text{CDCl}_3$ ):  $\delta$  147.08, 134.22, 132.71, 128.74, 128.67, 121.75, 108.92, 88.97, 88.25, 68.27, 23.08. HRMS (EI)  $m/z$  Calcd. for  $\text{C}_{12}\text{H}_{10}\text{Cl}$  ( $[\text{M}+\text{H}-\text{H}_2\text{O}]^+$ ): 189.0466. Found: 189.0466.

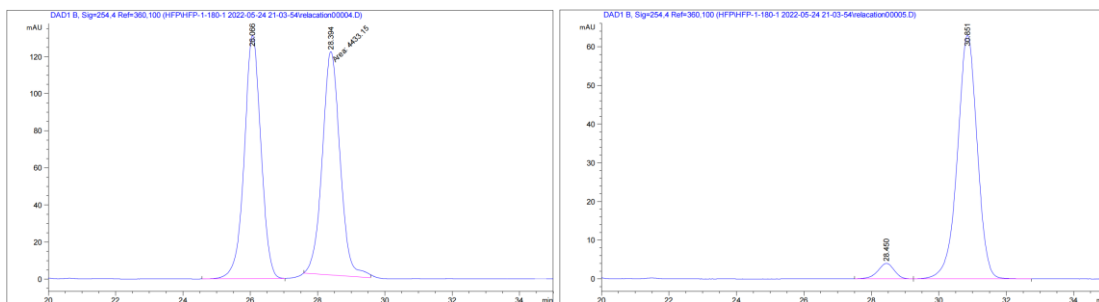

Signal 1: DAD1 B, Sig=254,4 Ref=360,100

Signal 1: DAD1 B, Sig=254,4 Ref=360,100

| Peak # | RetTime [min] | Type | Width [min] | Area [mAU*s] | Height [mAU] | Area %  | Peak # | RetTime [min] | Type | Width [min] | Area [mAU*s] | Height [mAU] | Area %  |
|--------|---------------|------|-------------|--------------|--------------|---------|--------|---------------|------|-------------|--------------|--------------|---------|
| 1      | 26.066        | BB   | 0.5276      | 4511.02100   | 131.03139    | 50.4353 | 1      | 28.450        | BB   | 0.5063      | 134.82475    | 3.98901      | 4.9893  |
| 2      | 28.394        | MM   | 0.6133      | 4433.14697   | 120.46500    | 49.5647 | 2      | 30.851        | BB   | 0.6277      | 2567.45679   | 62.96851     | 95.0107 |

### (E)-6-(p-Tolyl)hex-3-en-5-yn-2-ol (2d)

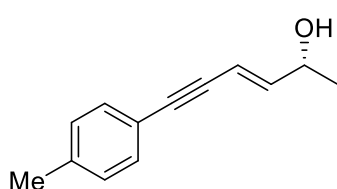

Light yellow oil, 99% yield, 93% ee;  $[\alpha]_D^{25} = +13.10$  (c = 1.0,  $\text{CHCl}_3$ ). The enantiomeric excess was determined by HPLC on OJ-H column, hexane: isopropanol = 95:5; flow rate = 1.0 mL/min; UV detection at 220 nm;  $t_R = 51.38$  min (minor), 56.48 min (major).  $^1\text{H}$

NMR (400 MHz,  $\text{CDCl}_3$ ):  $\delta$  7.37-7.29 (m, 3H), 7.12 (dd,  $J = 7.9, 5.8$  Hz, 3H), 6.25 (dd,  $J = 15.9, 5.9$  Hz, 1H), 5.91 (dd,  $J = 15.8, 1.4$  Hz, 1H), 4.41 (pd,  $J = 6.4, 1.5$  Hz, 1H), 2.35 (s, 3H), 1.75 (br, 1H), 1.32 (d,  $J = 6.4$  Hz, 3H).  $^{13}\text{C}$  NMR (101 MHz,  $\text{CDCl}_3$ ):  $\delta$  146.12, 138.27, 131.31, 128.99, 120.04, 109.30, 90.24, 86.53, 68.26, 22.96, 21.39. HRMS (EI) m/z Calcd. for  $\text{C}_{13}\text{H}_{13}$  ( $[\text{M}+\text{H}-\text{H}_2\text{O}]^+$ ): 169.1012.

Found: 169.1011.

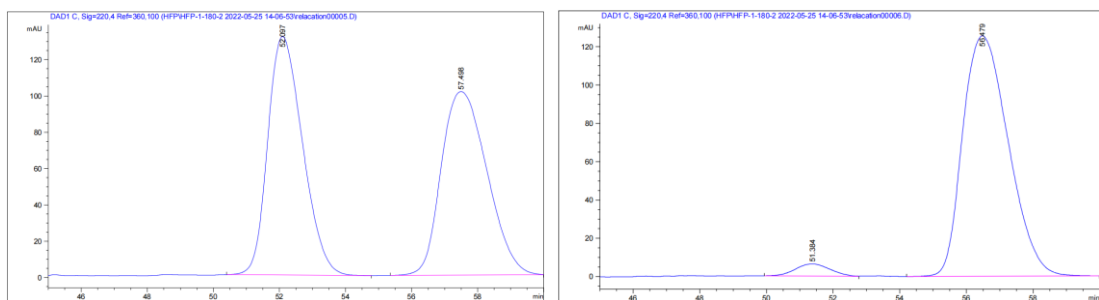

Signal 1: DAD1 C, Sig=220,4 Ref=360,100

Signal 1: DAD1 C, Sig=220,4 Ref=360,100

| Peak # | RetTime [min] | Type | Width [min] | Area [mAU*s] | Height [mAU] | Area %  | Peak # | RetTime [min] | Type | Width [min] | Area [mAU*s] | Height [mAU] | Area %  |
|--------|---------------|------|-------------|--------------|--------------|---------|--------|---------------|------|-------------|--------------|--------------|---------|
| 1      | 52.097        | BB   | 1.1529      | 9623.35938   | 131.32373    | 49.7889 | 1      | 51.384        | BB   | 0.8819      | 452.05243    | 6.32434      | 3.6475  |
| 2      | 57.498        | BBA  | 1.4544      | 9704.97266   | 101.05866    | 50.2111 | 2      | 56.479        | BBA  | 1.4816      | 1.19416e4    | 125.55444    | 96.3525 |

### (E)-6-(4-(Trifluoromethyl)phenyl)hex-3-en-5-yn-2-ol (2e)

Brown oil, 89% yield, 90% ee;  $[\alpha]_D^{25} = +14.70$  (c = 1.0,  $\text{CHCl}_3$ ). The enantiomeric excess was determined by HPLC on OJ-H column, hexane: isopropanol = 97:3; flow rate = 0.9 mL/min; UV detection at 220 nm;  $t_R = 34.11$  min (minor), 38.19 min (major).  $^1\text{H}$  NMR (400 MHz,  $\text{CDCl}_3$ ):  $\delta$  7.56 (d,  $J = 8.4$

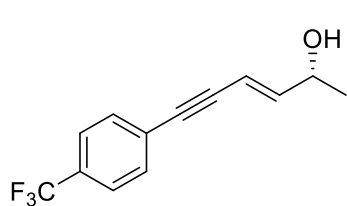

Hz, 2H), 7.52 (d,  $J = 8.2$  Hz, 2H), 6.33 (dd,  $J = 15.9, 5.6$  Hz, 1H), 5.94 (dd,  $J = 15.9, 1.5$  Hz, 1H), 4.44 (pd,  $J = 6.4, 1.5$  Hz, 1H), 1.83 (br, 1H), 1.34 (d,  $J = 6.4$  Hz, 3H).  $^{13}\text{C}$  NMR (101 MHz,  $\text{CDCl}_3$ ):  $\delta$  147.87, 131.70, 129.84 (q,  $J = 34.2$  Hz), 127.10, 125.24 (q,  $J = 3.6$  Hz), 122.72, 108.62, 89.69, 88.65, 68.20, 23.05.  $^{19}\text{F}$  NMR (377 MHz,  $\text{CDCl}_3$ ):  $\delta$  -62.82. HRMS (EI)  $m/z$  Calcd. for  $\text{C}_{13}\text{H}_{10}\text{F}_3$  ( $[\text{M}+\text{H}-\text{H}_2\text{O}]^+$ ): 223.0729. Found: 223.0728.

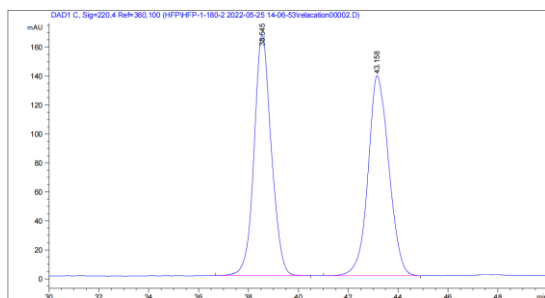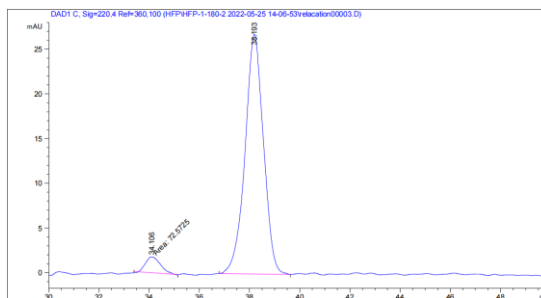

Signal 1: DAD1 C, Sig=220,4 Ref=360,100

Signal 1: DAD1 C, Sig=220,4 Ref=360,100

| Peak # | RetTime [min] | Type | Width [min] | Area [mAU*s] | Height [mAU] | Area %  | Peak # | RetTime [min] | Type | Width [min] | Area [mAU*s] | Height [mAU] | Area %  |
|--------|---------------|------|-------------|--------------|--------------|---------|--------|---------------|------|-------------|--------------|--------------|---------|
| 1      | 38.545        | BB   | 0.7180      | 7960.38721   | 165.83539    | 49.8509 | 1      | 34.106        | MM   | 0.6776      | 72.57250     | 1.78516      | 5.0377  |
| 2      | 43.158        | BB   | 0.8881      | 8008.00635   | 138.18913    | 50.1491 | 2      | 38.193        | BB   | 0.7495      | 1368.01831   | 26.80314     | 94.9623 |

**(E)-6-(4-Methoxyphenyl)hex-3-en-5-yn-2-ol (2f)** <sup>[9]</sup>

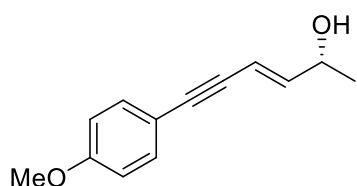

Light yellow oil, 99% yield, 92% ee;  $[\alpha]_{\text{D}}^{25} = +53.30$  ( $c = 1.0$ ,  $\text{CHCl}_3$ ). The enantiomeric excess was determined by HPLC on OD-H column, hexane: isopropanol = 90:10; flow rate = 1.0 mL/min; UV detection at 210 nm;  $t_{\text{R}} = 17.00$  min (minor), 33.63 min (major).

$^1\text{H}$  NMR (600 MHz,  $\text{CDCl}_3$ ):  $\delta$  7.37 (d,  $J = 8.6$  Hz, 2H), 6.85 (d,  $J = 8.3$  Hz, 2H), 6.23 (dd,  $J = 15.9, 5.8$  Hz, 1H), 5.97-5.87 (m, 1H), 4.41 (p,  $J = 6.2$  Hz, 1H), 3.81 (s, 3H), 1.70 (br, 1H), 1.33 (d,  $J = 6.4$  Hz, 3H).  $^{13}\text{C}$  NMR (151 MHz,  $\text{CDCl}_3$ ):  $\delta$  159.58, 145.82, 132.97, 115.35, 113.99, 109.49, 90.17, 85.99, 68.39, 55.29, 23.08. HRMS (EI)  $m/z$  Calcd. for  $\text{C}_{13}\text{H}_{13}\text{O}$  ( $[\text{M}+\text{H}-\text{H}_2\text{O}]^+$ ): 185.0961. Found: 185.0958.

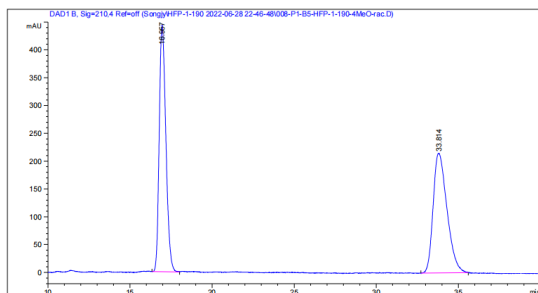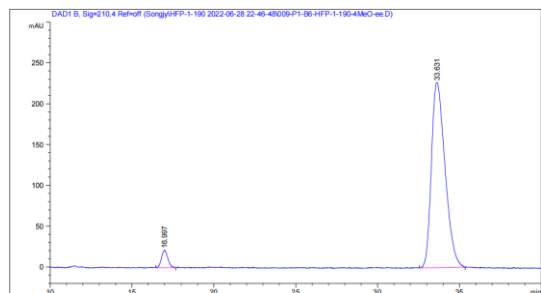

Signal 1: DAD1 B, Sig=210,4 Ref=off

Signal 1: DAD1 B, Sig=210,4 Ref=off

| Peak # | RetTime [min] | Type | Width [min] | Area [mAU*s] | Height [mAU] | Area %  | Peak # | RetTime [min] | Type | Width [min] | Area [mAU*s] | Height [mAU] | Area %  |
|--------|---------------|------|-------------|--------------|--------------|---------|--------|---------------|------|-------------|--------------|--------------|---------|
| 1      | 16.957        | BV R | 0.4341      | 1.24732e4    | 443.46393    | 49.8112 | 1      | 16.997        | VV R | 0.3250      | 566.77216    | 21.40012     | 4.1412  |
| 2      | 33.814        | VV R | 0.6900      | 1.25677e4    | 215.00420    | 50.1888 | 2      | 33.631        | VB R | 0.6797      | 1.31196e4    | 226.53383    | 95.8588 |

**(E)-6-(3-Fluorophenyl)hex-3-en-5-yn-2-ol (2g)**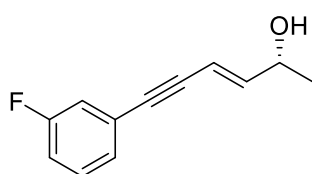

Brown oil, 89% yield, 90% ee;  $[\alpha]_D^{25} = +23.20$  ( $c = 1.0$ ,  $\text{CHCl}_3$ ). The enantiomeric excess was determined by HPLC on OD-H column, hexane: isopropanol = 95:5; flow rate = 1.0 mL/min; UV detection at 220 nm;  $t_R = 10.96$  min (minor), 13.95 min (major).  $^1\text{H}$  NMR (600 MHz,  $\text{CDCl}_3$ ):  $\delta$  7.27 (q,  $J = 7.8$  Hz, 1H), 7.20 (dd,  $J = 7.6, 1.4$  Hz, 1H), 7.13-7.10 (m, 1H), 7.01 (td,  $J = 8.5, 2.7$  Hz, 1H), 6.29 (dd,  $J = 15.9, 5.7$  Hz, 1H), 5.91 (dd,  $J = 16.0, 1.5$  Hz, 1H), 4.55-4.35 (m, 1H), 1.89 (br, 1H), 1.33 (d,  $J = 6.5$  Hz, 3H).  $^{13}\text{C}$  NMR (151 MHz,  $\text{CDCl}_3$ ):  $\delta$  162.36 (d,  $J = 246.3$  Hz), 147.36, 129.87 (d,  $J = 8.7$  Hz), 127.39 (d,  $J = 2.8$  Hz), 125.10 (d,  $J = 9.4$  Hz), 118.26 (d,  $J = 22.6$  Hz), 115.54 (d,  $J = 21.2$  Hz), 108.80, 88.81 (d,  $J = 3.6$  Hz), 88.19, 68.25, 23.05.  $^{19}\text{F}$  NMR (376 MHz,  $\text{CDCl}_3$ ):  $\delta$  -113.03 (td,  $J = 9.2, 5.9$  Hz). HRMS (EI)  $m/z$  Calcd. for  $\text{C}_{14}\text{H}_{15}\text{O}$  ( $[\text{M}+\text{H}-\text{H}_2\text{O}]^+$ ): 173.0761. Found: 173.0761.

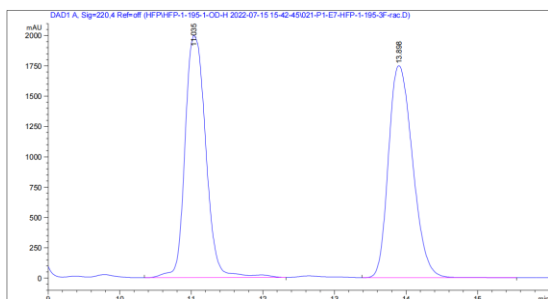

Signal 1: DAD1 A, Sig=220,4 Ref=off

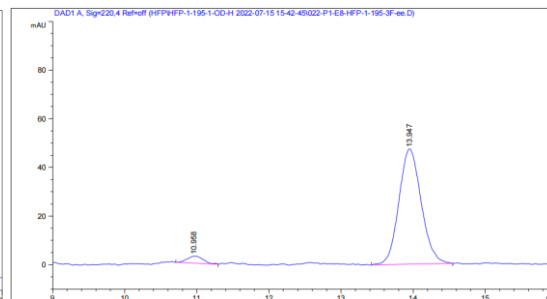

Signal 1: DAD1 A, Sig=220,4 Ref=off

| Peak # | RetTime [min] | Type | Width [min] | Area [mAU*s] | Height [mAU] | Area %  | Peak # | RetTime [min] | Type | Width [min] | Area [mAU*s] | Height [mAU] | Area %  |
|--------|---------------|------|-------------|--------------|--------------|---------|--------|---------------|------|-------------|--------------|--------------|---------|
| 1      | 11.035        | BV R | 0.3164      | 4.03538e4    | 1998.46814   | 49.6305 | 1      | 10.958        | BV R | 0.1984      | 44.01674     | 2.91097      | 4.1507  |
| 2      | 13.898        | BV R | 0.3691      | 4.09546e4    | 1748.41650   | 50.3695 | 2      | 13.947        | BB   | 0.3361      | 1016.44257   | 47.41914     | 95.8493 |

**(E)-6-(3-Chlorophenyl)hex-3-en-5-yn-2-ol (2h)**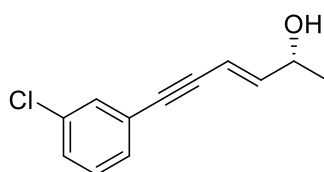

Light yellow oil, 97% yield, 90% ee;  $[\alpha]_D^{25} = +6.40$  ( $c = 1.0$ ,  $\text{CHCl}_3$ ). The enantiomeric excess was determined by HPLC on OD-H column, hexane: isopropanol = 95:5; flow rate = 1.0 mL/min; UV detection at 210 nm;  $t_R = 10.56$  min (minor), 13.29 min (major).  $^1\text{H}$  NMR (600 MHz,  $\text{CDCl}_3$ ):  $\delta$  7.41 (d,  $J = 1.9$  Hz, 1H), 7.31-7.26 (m, 2H), 7.23 (t,  $J = 7.8$  Hz, 1H), 6.29 (dd,  $J =$



15.9, 5.7 Hz, 1H), 5.91 (dd,  $J = 15.9, 1.6$  Hz, 1H), 4.42 (p,  $J = 6.2$  Hz, 1H), 1.80 (br, 1H), 1.33 (d,  $J = 6.5$  Hz, 3H).  $^{13}\text{C}$  NMR (151 MHz,  $\text{CDCl}_3$ ):  $\delta$  147.42, 134.14, 131.34, 129.75, 129.62, 129.54, 128.45, 124.98, 108.78, 88.63, 88.49, 68.24, 23.06. HRMS (EI)  $m/z$  Calcd. for  $\text{C}_{12}\text{H}_{10}\text{Cl}$  ( $[\text{M}+\text{H}-\text{H}_2\text{O}]^+$ ): 189.0466. Found: 189.0466.

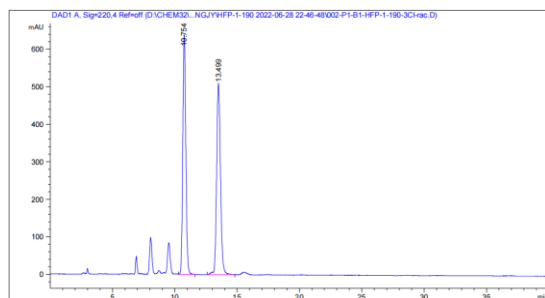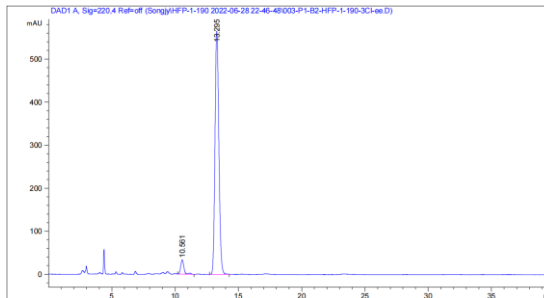

Signal 1: DAD1 A, Sig=220,4 Ref=off

Signal 1: DAD1 A, Sig=220,4 Ref=off

| Peak # | RetTime [min] | Type | Width [min] | Area [mAU*s] | Height [mAU] | Area %  | Peak # | RetTime [min] | Type | Width [min] | Area [mAU*s] | Height [mAU] | Area %  |
|--------|---------------|------|-------------|--------------|--------------|---------|--------|---------------|------|-------------|--------------|--------------|---------|
| 1      | 10.754        | BB   | 0.2633      | 1.07716e4    | 637.05548    | 49.5469 | 1      | 10.561        | BV R | 0.2532      | 591.30859    | 33.16810     | 4.7316  |
| 2      | 13.499        | VB R | 0.3323      | 1.09687e4    | 508.67017    | 50.4531 | 2      | 13.295        | BB   | 0.3259      | 1.19056e4    | 564.82953    | 95.2684 |

### (E)-6-(3-(Trifluoromethyl)phenyl)hex-3-en-5-yn-2-ol (2i)

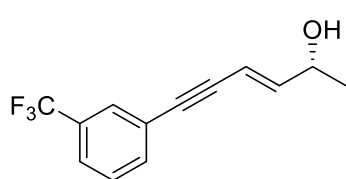

Brown oil, 87% yield, 90% ee;  $[\alpha]_{\text{D}}^{25} = +14.70$  ( $c = 1.0, \text{CHCl}_3$ ).

The enantiomeric excess was determined by HPLC on OD-H column, hexane: isopropanol = 95:5; flow rate = 1.0 mL/min; UV detection at 220 nm;  $t_{\text{R}} = 8.16$  min (minor), 8.95 min (major).  $^1\text{H}$  NMR

(600 MHz,  $\text{CDCl}_3$ ):  $\delta$  7.68 (s, 1H), 7.58 (d,  $J = 7.8$  Hz, 1H), 7.54 (d,  $J = 7.8$  Hz, 1H), 7.43 (t,  $J = 7.8$  Hz, 1H), 6.32 (dd,  $J = 16.0, 5.6$  Hz, 1H), 5.93 (dd,  $J = 16.0, 1.5$  Hz, 1H), 4.51-4.32 (m, 1H), 1.84 (br, 1H), 1.34 (d,  $J = 6.5$  Hz, 3H).  $^{13}\text{C}$  NMR (151 MHz,  $\text{CDCl}_3$ ):  $\delta$  147.70, 134.53, 130.94 (d,  $J = 32.5$  Hz), 128.84, 128.29 (q,  $J = 3.9$  Hz), 124.71 (q,  $J = 3.7$  Hz), 124.22, 122.80, 108.62, 88.83, 88.47, 68.22, 23.06.  $^{19}\text{F}$  NMR (376 MHz,  $\text{CDCl}_3$ ):  $\delta$  -63.00. HRMS (EI)  $m/z$  Calcd. for  $\text{C}_{13}\text{H}_{10}\text{F}_3$  ( $[\text{M}+\text{H}-\text{H}_2\text{O}]^+$ ): 223.0729. Found: 223.0728.

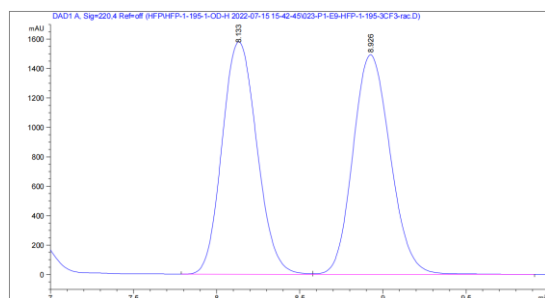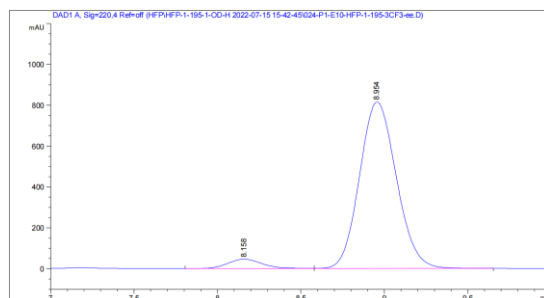

Signal 1: DAD1 A, Sig=220,4 Ref=off

Signal 1: DAD1 A, Sig=220,4 Ref=off

| Peak # | RetTime [min] | Type | Width [min] | Area [mAU*s] | Height [mAU] | Area %  | Peak # | RetTime [min] | Type | Width [min] | Area [mAU*s] | Height [mAU] | Area %  |
|--------|---------------|------|-------------|--------------|--------------|---------|--------|---------------|------|-------------|--------------|--------------|---------|
| 1      | 8.133         | BV   | 0.2314      | 2.29455e4    | 1580.34155   | 49.6816 | 1      | 8.158         | BV   | 0.2217      | 645.11975    | 45.42713     | 4.9148  |
| 2      | 8.926         | VB   | 0.2437      | 2.32396e4    | 1492.36121   | 50.3184 | 2      | 8.954         | VB   | 0.2389      | 1.24808e4    | 814.13019    | 95.0852 |

**(E)-6-(3-Methoxyphenyl)hex-3-en-5-yn-2-ol (2j)**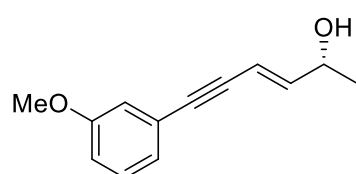

Light yellow oil, 98% yield, 93% ee;  $[\alpha]_D^{25} = +12.30$  (c = 1.0,  $\text{CHCl}_3$ ). The enantiomeric excess was determined by HPLC on OD-H column, hexane: isopropanol = 95:5; flow rate = 1.0 mL/min; UV detection at 210 nm;  $t_R = 10.56$  min (minor), 13.29 min (major).

$^1\text{H NMR}$  (400 MHz,  $\text{CDCl}_3$ ):  $\delta$  7.14 (t,  $J = 7.9$  Hz, 1H), 6.95 (dt,  $J = 7.6, 1.2$  Hz, 1H), 6.89 (dd,  $J = 2.7, 1.4$  Hz, 1H), 6.79 (ddd,  $J = 8.3, 2.6, 1.0$  Hz, 1H), 6.20 (dd,  $J = 15.9, 5.8$  Hz, 1H), 5.84 (dd,  $J = 15.9, 1.5$  Hz, 1H), 4.33 (pd,  $J = 6.4, 1.5$  Hz, 1H), 3.73 (s, 1H), 3.72 (s, 3H), 1.71 (br, 1H), 1.25 (zd,  $J = 6.5$  Hz, 3H).  $^{13}\text{C NMR}$  (101 MHz,  $\text{CDCl}_3$ ):  $\delta$  159.31, 146.80, 129.39, 124.23, 124.10, 116.28, 114.89, 109.13, 90.05, 87.14, 68.30, 55.27, 23.06. HRMS (EI)  $m/z$  Calcd. for  $\text{C}_{13}\text{H}_{13}\text{O}$  ( $[\text{M}+\text{H}-\text{H}_2\text{O}]^+$ ): 185.0961. Found: 185.0958.

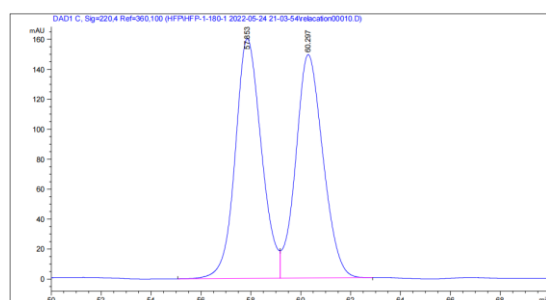

Signal 1: DAD1 C, Sig=220,4 Ref=360,100

| Peak # | RetTime [min] | Type | Width [min] | Area [mAU*s] | Height [mAU] | Area %  | Peak # | RetTime [min] | Type | Width [min] | Area [mAU*s] | Height [mAU] | Area %  |
|--------|---------------|------|-------------|--------------|--------------|---------|--------|---------------|------|-------------|--------------|--------------|---------|
| 1      | 57.853        | BV   | 1.1138      | 1.16540e4    | 159.99001    | 50.6981 | 1      | 58.027        | MM   | 1.0009      | 445.65683    | 7.42070      | 3.6921  |
| 2      | 60.297        | VB   | 1.1487      | 1.13331e4    | 149.11703    | 49.3019 | 2      | 60.102        | MM   | 1.2340      | 1.16250e4    | 157.00688    | 96.3079 |

Signal 1: DAD1 C, Sig=220,4 Ref=360,100

**(E)-6-(2-Fluorophenyl)hex-3-en-5-yn-2-ol (2k)**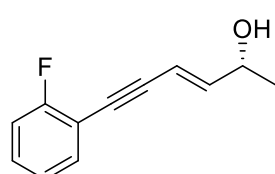

Brown oil, 89% yield, 93% ee;  $[\alpha]_D^{25} = +18.20$  (c = 1.0,  $\text{CHCl}_3$ ). The enantiomeric excess was determined by HPLC on OD-H column, hexane: isopropanol = 90:10; flow rate = 1.0 mL/min; UV detection at 220 nm;  $t_R = 7.08$  min (minor), 8.39 min (major).

$^1\text{H NMR}$  (600 MHz,  $\text{Chloroform-}d$ )  $\delta$  7.42 (td,  $J = 7.4, 1.8$  Hz, 1H), 7.28 (dddd,  $J = 8.4, 7.3, 5.3, 1.8$  Hz, 1H), 7.11-7.05 (m, 2H), 6.32 (dd,  $J = 15.9, 5.7$  Hz, 1H), 5.96 (dd,  $J = 15.9, 1.5$  Hz, 1H), 4.58-4.20 (m, 1H), 1.89 (br, 1H), 1.33 (d,  $J = 6.5$

Hz, 3H). <sup>13</sup>C NMR (151 MHz, Chloroform-*d*) δ 162.56 (d, *J* = 251.5 Hz), 147.36, 133.38, 129.92 (d, *J* = 8.1 Hz), 123.94 (d, *J* = 3.8 Hz), 115.49 (d, *J* = 21.0 Hz), 111.87 (d, *J* = 15.4 Hz), 108.93, 92.32 (d, *J* = 3.2 Hz), 83.32, 68.29, 23.02. <sup>19</sup>F NMR (376 MHz, Chloroform-*d*) δ -110.13 (m). HRMS (EI) *m/z* Calcd. for C<sub>14</sub>H<sub>15</sub>O ([M+H-H<sub>2</sub>O]<sup>+</sup>): 173.0761. Found: 173.0761.

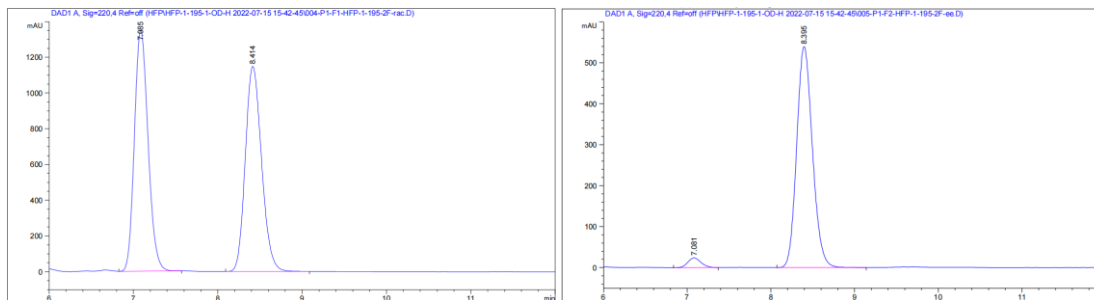

Signal 1: DAD1 A, Sig=220,4 Ref=off

Signal 1: DAD1 A, Sig=220,4 Ref=off

| Peak # | RetTime [min] | Type | Width [min] | Area [mAU*s] | Height [mAU] | Area %  | Peak # | RetTime [min] | Type | Width [min] | Area [mAU*s] | Height [mAU] | Area %  |
|--------|---------------|------|-------------|--------------|--------------|---------|--------|---------------|------|-------------|--------------|--------------|---------|
| 1      | 7.085         | BB   | 0.1773      | 1.51677e4    | 1347.83350   | 49.6104 | 1      | 7.081         | BB   | 0.1744      | 266.20370    | 24.19430     | 3.6318  |
| 2      | 8.414         | BB   | 0.2085      | 1.54059e4    | 1148.38062   | 50.3896 | 2      | 8.395         | BB   | 0.2027      | 7063.61182   | 539.78387    | 96.3682 |

### (*E*)-6-(2-Chlorophenyl)hex-3-en-5-yn-2-ol (2I)

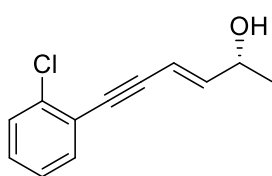

Light yellow oil, 93% yield, 92% ee;  $[\alpha]_D^{25} = +13.80$  (*c* = 1.0, CHCl<sub>3</sub>). The enantiomeric excess was determined by HPLC on OD-H column, hexane:isopropanol = 95:5; flow rate = 1.0 mL/min; UV detection at 220 nm; *t<sub>R</sub>* = 10.56 min (minor), 13.29 min (major). <sup>1</sup>H NMR (600 MHz, CDCl<sub>3</sub>): δ 7.47-7.44 (m, 1H), 7.40-7.37 (m, 1H), 7.24-7.18 (m, 2H), 6.34 (dd, *J* = 15.9, 5.7 Hz, 1H), 5.98 (dd, *J* = 15.9, 1.5 Hz, 1H), 4.51-4.27 (m, 1H), 1.75 (s, 1H), 1.33 (d, *J* = 6.5 Hz, 3H). <sup>13</sup>C NMR (151 MHz, CDCl<sub>3</sub>): δ 147.55, 135.75, 133.24, 129.26, 129.21, 126.44, 123.18, 108.92, 92.44, 86.77, 68.27, 23.01. HRMS (EI) *m/z* Calcd. for C<sub>12</sub>H<sub>10</sub>Cl ([M+H-H<sub>2</sub>O]<sup>+</sup>): 189.0466. Found: 189.0466.

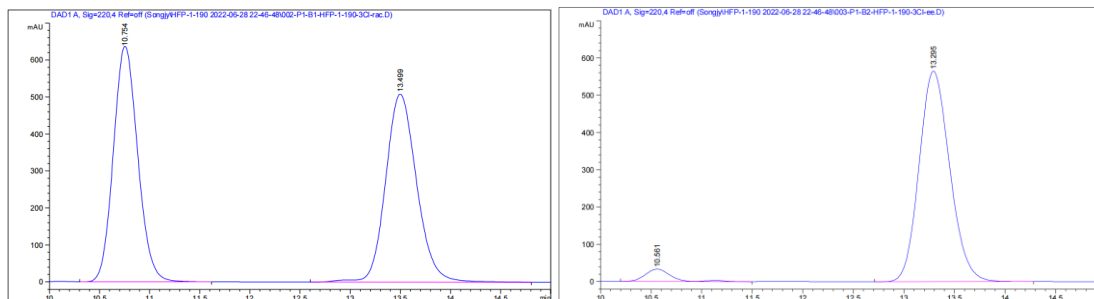

Signal 1: DAD1 A, Sig=220,4 Ref=off

Signal 1: DAD1 A, Sig=220,4 Ref=off

| Peak # | RetTime [min] | Type | Width [min] | Area [mAU*s] | Height [mAU] | Area %  | Peak # | RetTime [min] | Type | Width [min] | Area [mAU*s] | Height [mAU] | Area %  |
|--------|---------------|------|-------------|--------------|--------------|---------|--------|---------------|------|-------------|--------------|--------------|---------|
| 1      | 10.754        | BB   | 0.2633      | 1.07716e4    | 637.05548    | 49.5469 | 1      | 10.561        | BV R | 0.2532      | 591.30859    | 33.16810     | 4.7316  |
| 2      | 13.499        | VB R | 0.3323      | 1.09687e4    | 508.67017    | 50.4531 | 2      | 13.295        | BB   | 0.3259      | 1.19056e4    | 564.82953    | 95.2684 |

### (E)-6-(2-Methoxyphenyl)hex-3-en-5-yn-2-ol (2m)

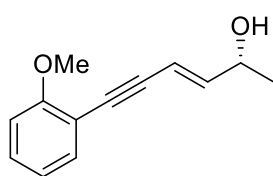

Light yellow oil, 99% yield, 91% ee;  $[\alpha]_D^{25} = +12.10$  ( $c = 1.0$ ,  $\text{CHCl}_3$ ). The enantiomeric excess was determined by HPLC on OD-H column, hexane: isopropanol = 80:20; flow rate = 1.0 mL/min; UV detection at 220 nm;  $t_R = 17.30$  min (minor), 32.48 min (major).  $^1\text{H}$  NMR (600 MHz,  $\text{CDCl}_3$ ):  $\delta$  7.40 (dd,  $J = 7.6, 1.7$  Hz, 1H), 7.30-7.26 (m, 1H), 6.91 (t,  $J = 7.5$  Hz, 1H), 6.87 (d,  $J = 8.4$  Hz, 1H), 6.29 (dd,  $J = 15.9, 5.9$  Hz, 1H), 5.98 (dd,  $J = 15.9, 1.4$  Hz, 1H), 4.41 (pd,  $J = 6.4, 1.4$  Hz, 1H), 3.89 (s, 3H), 1.60 (br, 1H), 1.32 (d,  $J = 6.4$  Hz, 3H).  $^{13}\text{C}$  NMR (151 MHz,  $\text{CDCl}_3$ ):  $\delta$  159.82, 146.35, 133.52, 129.74, 120.49, 112.37, 110.60, 109.59, 91.30, 86.44, 68.44, 55.82, 23.03. HRMS (EI)  $m/z$  Calcd. for  $\text{C}_{13}\text{H}_{13}\text{O}$  ( $[\text{M}+\text{H}-\text{H}_2\text{O}]^+$ ): 185.0961. Found: 185.0958.

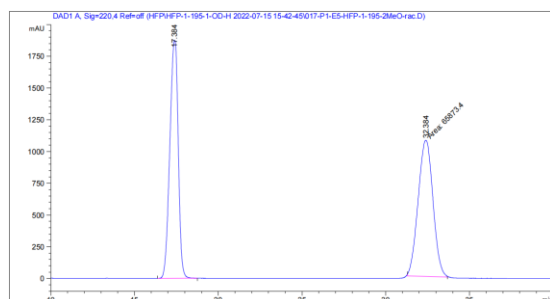

Signal 1: DAD1 A, Sig=220,4 Ref=off

| Peak # | RetTime [min] | Type | Width [min] | Area [mAU*s] | Height [mAU] | Area %  |
|--------|---------------|------|-------------|--------------|--------------|---------|
| 1      | 17.384        | BB   | 0.4200      | 6.53026e4    | 1876.32715   | 49.7824 |
| 2      | 32.384        | MM   | 1.0235      | 6.58734e4    | 1072.66650   | 50.2176 |

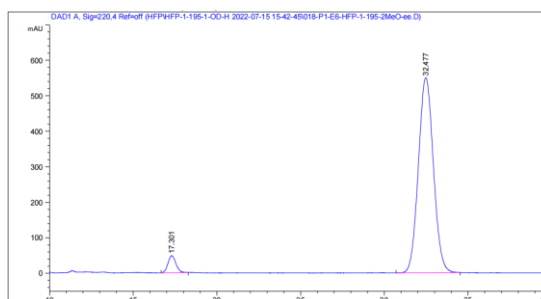

Signal 1: DAD1 A, Sig=220,4 Ref=off

| Peak # | RetTime [min] | Type | Width [min] | Area [mAU*s] | Height [mAU] | Area %  |
|--------|---------------|------|-------------|--------------|--------------|---------|
| 1      | 17.301        | BV R | 0.4464      | 1568.95361   | 47.86911     | 4.3821  |
| 2      | 32.477        | VV R | 0.8507      | 3.42348e4    | 549.63275    | 95.6179 |

### (E)-6-(2,3-Dimethoxyphenyl)hex-3-en-5-yn-2-ol (2n)

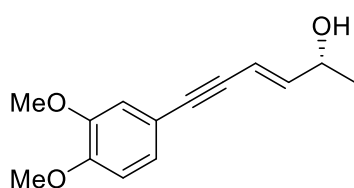

Light yellow oil, 96% yield, 91% ee;  $[\alpha]_D^{25} = +21.70$  ( $c = 1.0$ ,  $\text{CHCl}_3$ ). The enantiomeric excess was determined by HPLC on OD-H column, hexane: isopropanol = 90:10; flow rate = 1.0 mL/min; UV detection at 220 nm;  $t_R = 18.84$  min (minor), 29.06 min (major).  $^1\text{H}$  NMR (600 MHz,  $\text{CDCl}_3$ ):  $\delta$  7.04 (dd,  $J = 8.3, 1.9$  Hz, 1H), 6.94 (d,  $J = 1.9$  Hz, 1H), 6.80 (d,  $J = 8.3$  Hz, 1H), 6.24 (dd,  $J = 15.9, 5.9$  Hz, 1H), 5.91 (dd,  $J = 15.9, 1.5$  Hz, 1H), 4.57-4.33 (m, 1H), 3.88 (s, 3H), 3.87 (s, 3H), 1.59 (br, 1H), 1.33 (d,  $J = 6.4$  Hz, 3H).  $^{13}\text{C}$  NMR (151 MHz,  $\text{CDCl}_3$ ):  $\delta$  149.48, 148.62, 146.03, 124.82, 115.41, 114.19, 111.01, 109.35, 90.28, 85.88, 68.39, 55.89, 23.11. HRMS (EI)  $m/z$  Calcd. for  $\text{C}_{14}\text{H}_{15}\text{O}_2$  ( $[\text{M}+\text{H}-\text{H}_2\text{O}]^+$ ): 215.1067. Found: 215.1067.

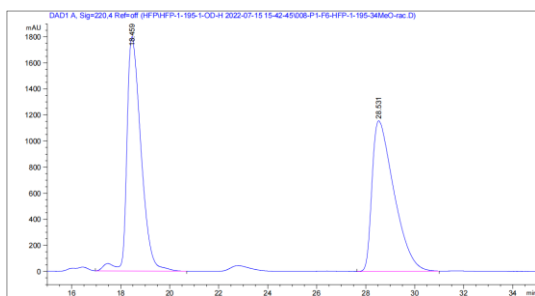

Signal 1: DAD1 A, Sig=220,4 Ref=off

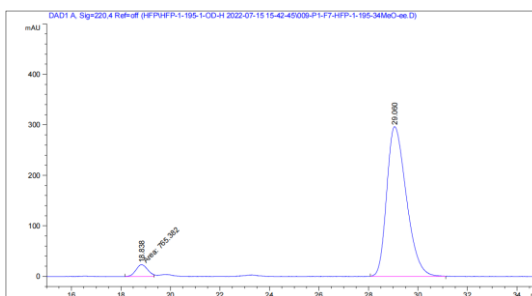

Signal 1: DAD1 A, Sig=220,4 Ref=off

| Peak # | RetTime [min] | Type | Width [min] | Area [mAU*s] | Height [mAU] | Area %  | Peak # | RetTime [min] | Type | Width [min] | Area [mAU*s] | Height [mAU] | Area %  |
|--------|---------------|------|-------------|--------------|--------------|---------|--------|---------------|------|-------------|--------------|--------------|---------|
| 1      | 18.459        | VB R | 0.4641      | 7.21558e4    | 1798.49377   | 50.1878 | 1      | 18.838        | MF   | 0.5463      | 765.38196    | 23.35213     | 4.4905  |
| 2      | 28.531        | BB   | 0.7614      | 7.16157e4    | 1154.96924   | 49.8122 | 2      | 29.060        | BV R | 0.7788      | 1.62793e4    | 296.40308    | 95.5095 |

### (E)-6-(Benzo[d][1,3]dioxol-5-yl)hex-3-en-5-yn-2-ol (2o)

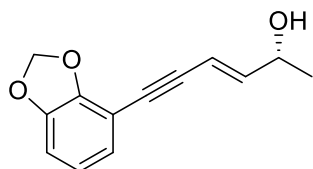

Light yellow oil, 98% yield, 91% ee;  $[\alpha]_D^{25} = +21.00$  (c = 1.0, CHCl<sub>3</sub>).

The enantiomeric excess was determined by HPLC on OD-H column, hexane: isopropanol = 90:10; flow rate = 1.0 mL/min; UV detection at 220 nm;  $t_R = 17.30$  min (minor), 32.48 min (major). <sup>1</sup>H NMR (600 MHz, CDCl<sub>3</sub>):  $\delta$  6.87 (dd,  $J = 6.1, 3.1$  Hz, 1H), 6.77 (q,  $J = 3.9, 3.1$  Hz, 2H), 6.30 (dd,  $J = 15.9, 5.7$  Hz, 1H), 6.01 (s, 2H), 5.95 (dd,  $J = 15.9, 1.6$  Hz, 1H), 4.41 (pd,  $J = 6.5, 1.5$  Hz, 1H), 1.66 (br, 1H), 1.32 (d,  $J = 6.5$  Hz, 3H). <sup>13</sup>C NMR (151 MHz, CDCl<sub>3</sub>):  $\delta$  148.30, 147.41, 147.21, 124.77, 121.60, 108.90, 108.74, 105.02, 101.29, 91.36, 83.85, 68.29, 23.02. HRMS (EI) m/z Calcd. for C<sub>13</sub>H<sub>11</sub>O<sub>2</sub> ([M+H-H<sub>2</sub>O]<sup>+</sup>): 199.0754. Found: 199.0753.

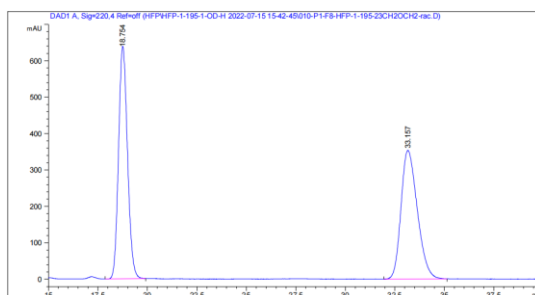

Signal 1: DAD1 A, Sig=220,4 Ref=off

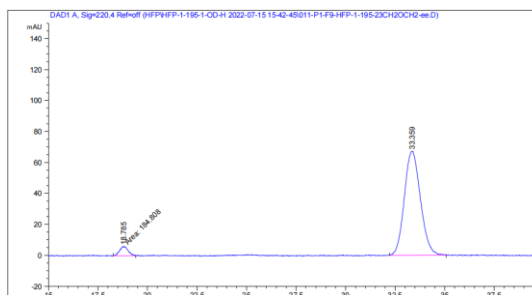

Signal 1: DAD1 A, Sig=220,4 Ref=off

| Peak # | RetTime [min] | Type | Width [min] | Area [mAU*s] | Height [mAU] | Area %  | Peak # | RetTime [min] | Type | Width [min] | Area [mAU*s] | Height [mAU] | Area %  |
|--------|---------------|------|-------------|--------------|--------------|---------|--------|---------------|------|-------------|--------------|--------------|---------|
| 1      | 18.754        | BB   | 0.4828      | 2.00676e4    | 638.23840    | 49.8402 | 1      | 18.785        | MM   | 0.5123      | 184.80820    | 6.01290      | 4.6504  |
| 2      | 33.157        | BB   | 0.7904      | 2.01963e4    | 353.56485    | 50.1598 | 2      | 33.359        | BV R | 0.7119      | 3789.23486   | 67.19691     | 95.3496 |

### (E)-6-(Naphthalen-1-yl)hex-3-en-5-yn-2-ol (2p)

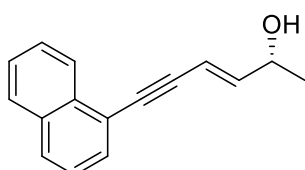

Light yellow oil, 96% yield, 92% ee;  $[\alpha]_D^{25} = +11.60$  (c = 1.0, CHCl<sub>3</sub>).

The enantiomeric excess was determined by HPLC on OJ-H column, hexane: isopropanol = 95:5; flow rate = 0.9 mL/min; UV detection at

220 nm;  $t_R = 51.42$  min (minor), 60.18 min (major).  $^1\text{H}$  NMR (400 MHz,  $\text{CDCl}_3$ ):  $\delta$  8.36-8.28 (m, 1H), 7.83 (ddt,  $J = 12.9, 8.3, 1.0$  Hz, 2H), 7.70-7.64 (m, 1H), 7.55 (dddd,  $J = 22.2, 8.1, 6.8, 1.4$  Hz, 3H), 7.43 (dt,  $J = 8.3, 6.2$  Hz, 1H), 6.39 (dd,  $J = 15.9, 5.8$  Hz, 1H), 6.15-5.99 (m, 1H), 4.47 (pd,  $J = 6.5, 1.5$  Hz, 1H), 1.72 (br, 1H), 1.38 (d,  $J = 6.4$  Hz, 3H).  $^{13}\text{C}$  NMR (101 MHz,  $\text{CDCl}_3$ ):  $\delta$  146.75, 133.22, 133.19, 130.33, 128.73, 128.29, 126.75, 126.43, 126.18, 125.27, 120.92, 109.40, 92.22, 88.26, 68.40, 23.12. HRMS (EI)  $m/z$  Calcd. for  $\text{C}_{16}\text{H}_{13}$  ( $[\text{M}+\text{H}-\text{H}_2\text{O}]^+$ ): 205.1012. Found: 205.1012.

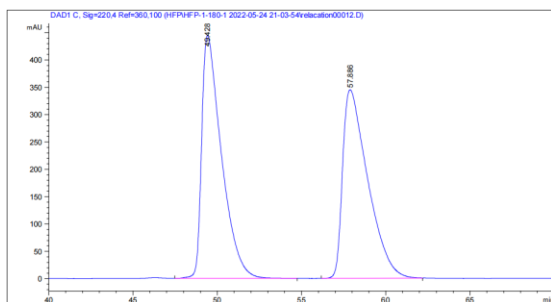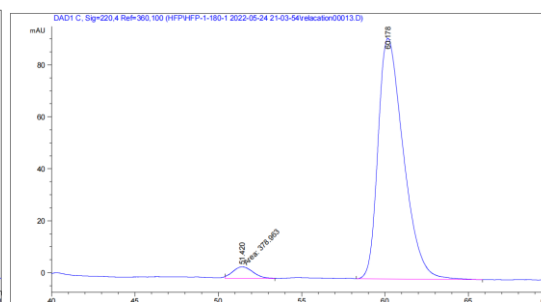

Signal 1: DAD1 C, Sig=220,4 Ref=360,100

Signal 1: DAD1 C, Sig=220,4 Ref=360,100

| Peak # | RetTime [min] | Type | Width [min] | Area [mAU*s] | Height [mAU] | Area %  | Peak # | RetTime [min] | Type | Width [min] | Area [mAU*s] | Height [mAU] | Area %  |
|--------|---------------|------|-------------|--------------|--------------|---------|--------|---------------|------|-------------|--------------|--------------|---------|
| 1      | 49.428        | BB   | 1.2038      | 3.61690e4    | 444.25500    | 50.3582 | 1      | 51.420        | MM   | 1.4060      | 378.96301    | 4.49229      | 3.7349  |
| 2      | 57.886        | BB   | 1.4825      | 3.56545e4    | 344.76144    | 49.6418 | 2      | 60.178        | BB   | 1.5551      | 9767.70703   | 92.56463     | 96.2651 |

### (E)-6-(Naphthalen-2-yl)hex-3-en-5-yn-2-ol (2q)

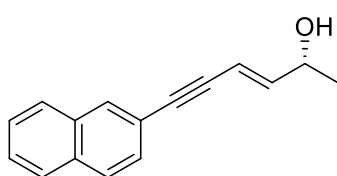

Light yellow oil, 94% yield, 90% ee;  $[\alpha]_D^{25} = +27.10$  ( $c = 1.0$ ,  $\text{CHCl}_3$ ). The enantiomeric excess was determined by HPLC on OD-H column, hexane: isopropanol = 92:8; flow rate = 1.0 mL/min; UV detection at 220 nm;  $t_R = 16.75$  min (minor), 23.37 min (major).

$^1\text{H}$  NMR (600 MHz,  $\text{CDCl}_3$ ):  $\delta$  7.96 (d,  $J = 1.6$  Hz, 1H), 7.82-7.76 (m, 3H), 7.49 (ddd,  $J = 7.2, 3.4, 2.0$  Hz, 3H), 6.33 (dd,  $J = 15.9, 5.8$  Hz, 1H), 5.98 (dd,  $J = 15.8, 1.5$  Hz, 1H), 4.44 (pd,  $J = 6.5, 1.5$  Hz, 1H), 1.73 (br, 1H), 1.35 (d,  $J = 6.5$  Hz, 3H).  $^{13}\text{C}$  NMR (151 MHz,  $\text{CDCl}_3$ ):  $\delta$  146.80, 133.01, 132.79, 131.37, 128.34, 128.00, 127.77 (d, 2 C), 126.68, 126.56, 120.56, 109.27, 90.57, 87.69, 68.36, 23.10. HRMS (EI)  $m/z$  Calcd. for  $\text{C}_{16}\text{H}_{13}$  ( $[\text{M}+\text{H}-\text{H}_2\text{O}]^+$ ): 205.1012. Found: 205.1012.

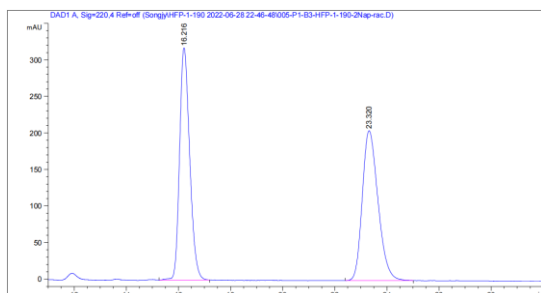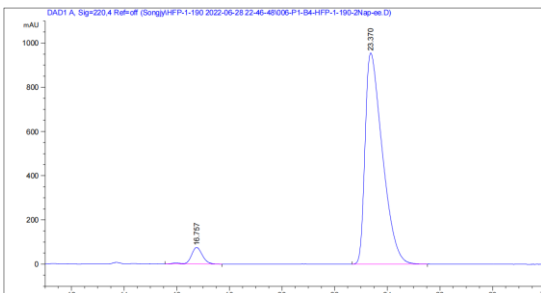

Signal 1: DAD1 A, Sig=220,4 Ref=off

Signal 1: DAD1 A, Sig=220,4 Ref=off

| Peak # | RetTime [min] | Type | Width [min] | Area [mAU*s] | Height [mAU] | Area %  | Peak # | RetTime [min] | Type | Width [min] | Area [mAU*s] | Height [mAU] | Area %  |
|--------|---------------|------|-------------|--------------|--------------|---------|--------|---------------|------|-------------|--------------|--------------|---------|
| 1      | 16.216        | BB   | 0.4100      | 8552.31934   | 317.76370    | 49.9427 | 1      | 16.757        | VB R | 0.4192      | 2259.26221   | 75.34460     | 4.9310  |
| 2      | 23.320        | BB   | 0.6359      | 8571.95703   | 204.97488    | 50.0573 | 2      | 23.370        | BB   | 0.6340      | 4.35587e4    | 955.30060    | 95.0690 |

**(E)-6-(Thiophen-2-yl)hex-3-en-5-yn-2-ol (2r)**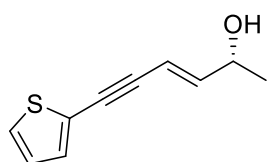Brown oil, 78% yield, 60% ee;  $[\alpha]_D^{25} = +2.00$  (c = 0.5, CHCl<sub>3</sub>). The en-

antiomeric excess was determined by HPLC on OD-H column, hexane:

isopropanol = 90:110; flow rate = 1.0 mL/min; UV detection at 254 nm;

 $t_R = 8.19$  min (minor), 10.06 min (major). <sup>1</sup>H NMR (600 MHz, CDCl<sub>3</sub>):  $\delta$ 7.25 (d,  $J = 3.7$  Hz, 1H), 7.19 (d,  $J = 3.7$  Hz, 1H), 6.97 (dd,  $J = 5.2, 3.7$  Hz, 1H), 6.26 (dd,  $J = 15.9, 5.7$ Hz, 1H), 5.93 (dd,  $J = 15.9, 1.5$  Hz, 1H), 4.42 (pd,  $J = 6.3, 1.5$  Hz, 1H), 1.57 (br, 1H), 1.33 (d,  $J = 6.4$ Hz, 3H). <sup>13</sup>C NMR (151 MHz, CDCl<sub>3</sub>):  $\delta$  146.68, 131.79, 127.22, 127.07, 123.30, 108.90, 91.10, 83.30,68.30, 23.08. HRMS (EI) m/z Calcd. for C<sub>10</sub>H<sub>9</sub>S ([M+H-H<sub>2</sub>O]<sup>+</sup>): 161.0420. Found: 161.0420.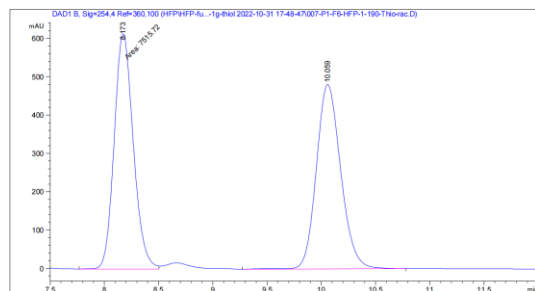

Signal 1: DAD1 B, Sig=254,4 Ref=360,100

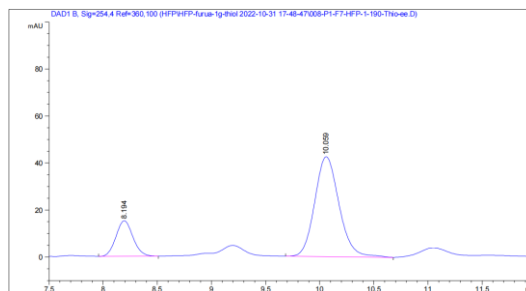

Signal 1: DAD1 B, Sig=254,4 Ref=360,100

| Peak # | RetTime [min] | Type | Width [min] | Area [mAU*s] | Height [mAU] | Area %  | Peak # | RetTime [min] | Type | Width [min] | Area [mAU*s] | Height [mAU] | Area %  |
|--------|---------------|------|-------------|--------------|--------------|---------|--------|---------------|------|-------------|--------------|--------------|---------|
| 1      | 8.173         | MF   | 0.2039      | 7515.72217   | 614.23846    | 49.9730 | 1      | 8.194         | BB   | 0.1695      | 165.49106    | 15.14762     | 19.9449 |
| 2      | 10.059        | BB   | 0.2404      | 7523.84619   | 481.22772    | 50.0270 | 2      | 10.059        | BB   | 0.2401      | 664.25189    | 42.55073     | 80.0551 |

**(E)-6-Cyclohexylhex-3-en-5-yn-2-ol (2s)**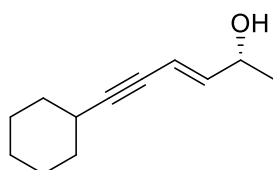Light yellow oil, 99% yield, 99% ee;  $[\alpha]_D^{25} = +13.90$  (c = 1.0, CHCl<sub>3</sub>). The en-

antiomeric excess was determined by HPLC on OD-H column, hexane:

isopropanol = 98:2; flow rate = 0.5 mL/min; UV detection at 220 nm;  $t_R =$ 20.57 min (minor), 21.61 min (major). <sup>1</sup>H NMR (600 MHz, CDCl<sub>3</sub>):  $\delta$  6.07(ddd,  $J = 15.8, 6.2, 0.6$  Hz, 1H), 5.69 (ddd,  $J = 15.8, 2.1, 1.4$  Hz, 1H), 4.37-4.26 (m, 1H), 2.61-2.37 (m,1H), 1.83-1.78 (m, 2H), 1.73-1.67 (m, 2H), 1.55-1.49 (m, 1H), 1.43 (dtd,  $J = 15.3, 8.6, 7.7, 3.3$  Hz, 2H),1.35-1.26 (m, 4H). 1.27 (d,  $J = 6.4$  Hz, 3H). <sup>13</sup>C NMR (151 MHz, CDCl<sub>3</sub>):  $\delta$  144.96, 109.96, 96.21,78.13, 68.43, 32.66, 29.69, 25.86, 24.92, 23.00. HRMS (EI) m/z Calcd. for C<sub>12</sub>H<sub>17</sub> ([M+H-H<sub>2</sub>O]<sup>+</sup>):

161.1325. Found: 161.1326.

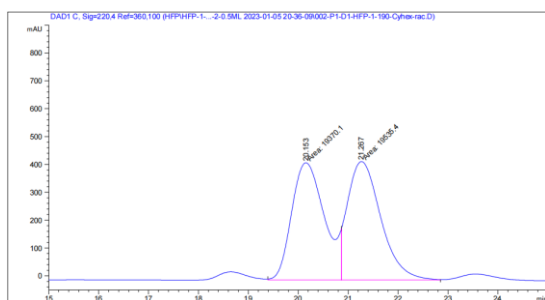

Signal 1: DAD1 C, Sig=220,4 Ref=360,100

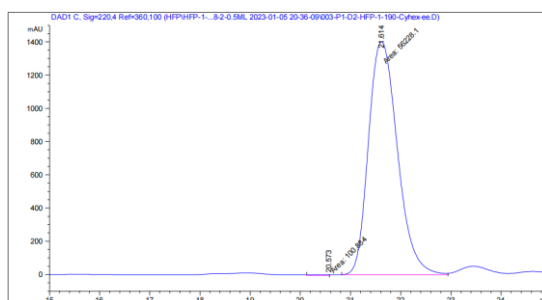

Signal 1: DAD1 C, Sig=220,4 Ref=360,100

| Peak # | RetTime [min] | Type | Width [min] | Area [mAU*s] | Height [mAU] | Area %  | Peak # | RetTime [min] | Type | Width [min] | Area [mAU*s] | Height [mAU] | Area %  |
|--------|---------------|------|-------------|--------------|--------------|---------|--------|---------------|------|-------------|--------------|--------------|---------|
| 1      | 20.153        | MF   | 0.7679      | 1.93701e4    | 420.43927    | 49.7875 | 1      | 20.573        | MM   | 0.4428      | 100.88435    | 3.79688      | 0.1791  |
| 2      | 21.267        | FM   | 0.7667      | 1.95354e4    | 424.66470    | 50.2125 | 2      | 21.614        | FM   | 0.6677      | 5.62281e4    | 1403.56348   | 99.8209 |

### (E)-6-Cyclopentylhex-3-en-5-yn-2-ol (2t)

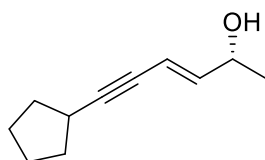

Light yellow oil, 97% yield, 95% ee;  $[\alpha]_D^{25} = +10.40$  (c = 1.0, CHCl<sub>3</sub>).

The enantiomeric excess was determined by HPLC on OD-H column, hexane: isopropanol = 98:2; flow rate = 0.8 mL/min; UV detection at 220 nm;  $t_R = 11.21$  min (minor), 11.97 min (major). <sup>1</sup>H NMR (600 MHz, CDCl<sub>3</sub>):

$\delta$  6.08 (ddd,  $J = 15.8, 6.4, 0.6$  Hz, 1H), 5.70 (ddd,  $J = 15.8, 2.1, 1.4$  Hz, 1H), 4.34 (pd,  $J = 6.4, 1.4$  Hz, 1H), 2.73 (pd,  $J = 7.6, 2.1$  Hz, 1H), 2.00-1.90 (m, 2H), 1.80-1.70 (m, 2H), 1.69-1.50 (m, 6H), 1.29 (d,  $J = 6.4$  Hz, 3H). <sup>13</sup>C NMR (151 MHz, CDCl<sub>3</sub>):  $\delta$  144.91, 109.98, 95.57, 77.76, 68.43, 33.82, 30.76, 24.99, 23.01. HRMS (EI)  $m/z$  Calcd. for C<sub>11</sub>H<sub>15</sub> ([M+H-H<sub>2</sub>O]<sup>+</sup>): 147.1168. Found: 147.1169.

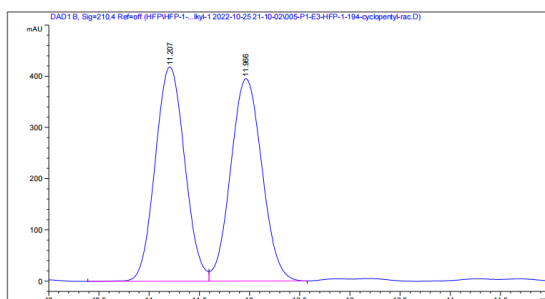

Signal 1: DAD1 B, Sig=210,4 Ref=off

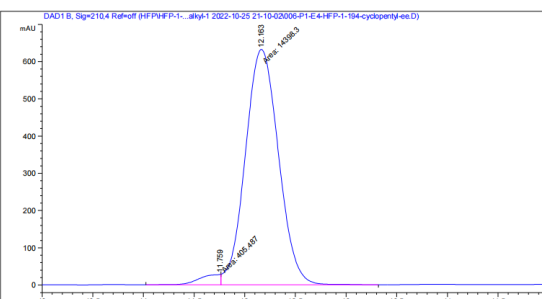

Signal 1: DAD1 B, Sig=210,4 Ref=off

| Peak # | RetTime [min] | Type | Width [min] | Area [mAU*s] | Height [mAU] | Area %  | Peak # | RetTime [min] | Type | Width [min] | Area [mAU*s] | Height [mAU] | Area %  |
|--------|---------------|------|-------------|--------------|--------------|---------|--------|---------------|------|-------------|--------------|--------------|---------|
| 1      | 11.207        | BV   | 0.3228      | 8564.08301   | 418.37183    | 50.0252 | 1      | 11.759        | MF   | 0.2414      | 405.48688    | 27.98990     | 2.7391  |
| 2      | 11.966        | VB   | 0.3424      | 8555.45996   | 395.38840    | 49.9748 | 2      | 12.163        | FM   | 0.3797      | 1.43983e4    | 631.99536    | 97.2609 |

### (E)-Tridec-3-en-5-yn-2-ol (2u)

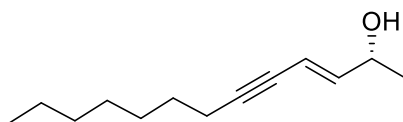

Light yellow oil, 99% yield, 93% ee;  $[\alpha]_D^{25} = +8.10$  (c = 1.0, CHCl<sub>3</sub>). The enantiomeric excess was determined by HPLC on AS-H column, hexane: isopropanol = 97:3; flow rate = 0.6



mL/min; UV detection at 210 nm;  $t_R$  = 8.92 min (major), 9.56 min (minor).  $^1\text{H}$  NMR (600 MHz,  $\text{CDCl}_3$ ):  $\delta$  6.07 (dd,  $J$  = 15.8, 6.1 Hz, 1H), 5.68 (dq,  $J$  = 15.8, 1.9 Hz, 1H), 4.33 (pd,  $J$  = 6.1, 1.3 Hz, 1H), 2.29 (td,  $J$  = 7.2, 2.1 Hz, 2H), 1.52 (p,  $J$  = 7.2 Hz, 3H), 1.33-1.24 (m, 11H), 0.88 (t,  $J$  = 6.8 Hz, 3H).  $^{13}\text{C}$  NMR (151 MHz,  $\text{CDCl}_3$ ):  $\delta$  145.04, 109.92, 91.48, 78.23, 68.42, 31.74, 28.87, 28.82, 28.72, 23.03, 22.63, 19.39, 14.09. HRMS (EI)  $m/z$  Calcd. for  $\text{C}_{13}\text{H}_{21}$  ( $[\text{M}+\text{H}-\text{H}_2\text{O}]^+$ ): 177.1638. Found: 177.1639.

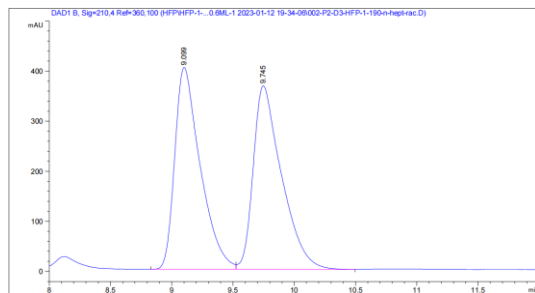

Signal 1: DAD1 B, Sig=210,4 Ref=360,100

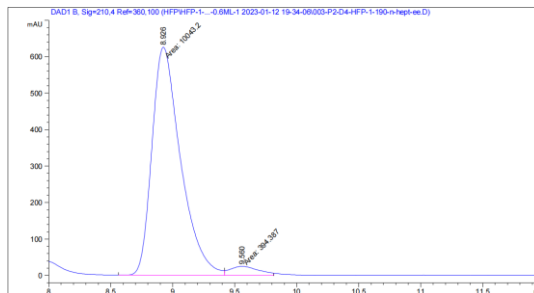

Signal 1: DAD1 B, Sig=210,4 Ref=360,100

| Peak # | RetTime [min] | Type | Width [min] | Area [mAU*s] | Height [mAU] | Area %  | Peak # | RetTime [min] | Type | Width [min] | Area [mAU*s] | Height [mAU] | Area %  |
|--------|---------------|------|-------------|--------------|--------------|---------|--------|---------------|------|-------------|--------------|--------------|---------|
| 1      | 9.099         | BV   | 0.2128      | 5831.32959   | 403.10901    | 49.7374 | 1      | 8.926         | MF   | 0.2677      | 1.00432e4    | 625.20978    | 96.2215 |
| 2      | 9.745         | VB   | 0.2316      | 5892.91650   | 366.57050    | 50.2626 | 2      | 9.560         | MF   | 0.2668      | 394.38736    | 24.64115     | 3.7785  |

### (E)-7-Phenylhept-4-en-6-yn-3-ol (2v)

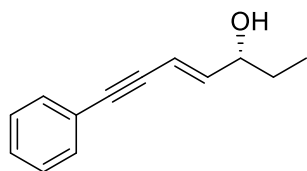

Light yellow oil, 98% yield, 93% ee;  $[\alpha]_D^{25} = +15.60$  ( $c = 1.0$ ,  $\text{CHCl}_3$ ).

The enantiomeric excess was determined by HPLC on OJ-H column, hexane: isopropanol = 95:5; flow rate = 0.9 mL/min; UV detection at 220 nm;  $t_R$  = 27.15 min (minor), 30.79 min (major).

$^1\text{H}$  NMR (600 MHz,  $\text{CDCl}_3$ ):  $\delta$  7.43 (m, 2H), 7.31 (m, 3H), 6.24 (dd,  $J$  = 15.9, 6.1 Hz, 1H), 5.94 (dd,  $J$  = 15.9, 1.4 Hz, 1H), 4.15 (qd,  $J$  = 6.3, 1.4 Hz, 1H), 1.71 (br, 1H), 1.61 (q,  $J$  = 7.2 Hz, 2H), 0.97 (t,  $J$  = 7.4 Hz, 3H).  $^{13}\text{C}$  NMR (151 MHz,  $\text{CDCl}_3$ ):  $\delta$  145.47, 131.52, 128.32, 128.21, 123.26, 110.07, 90.04, 87.40, 73.68, 29.91, 9.58. HRMS (EI)  $m/z$  Calcd. for  $\text{C}_{13}\text{H}_{13}\text{O}$  ( $[\text{M}+\text{H}-\text{H}_2\text{O}]^+$ ): 169.1012. Found: 169.1013.

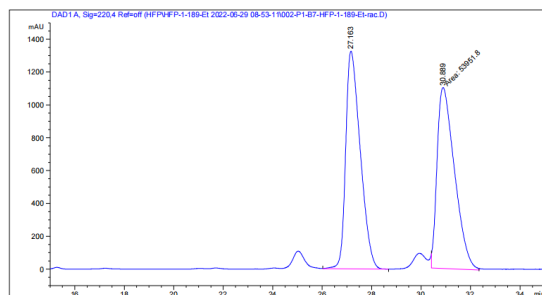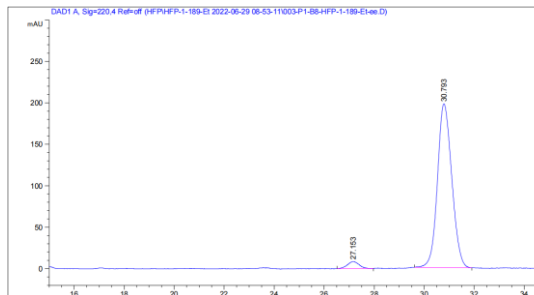

Signal 1: DAD1 A, Sig=220,4 Ref=off

Signal 1: DAD1 A, Sig=220,4 Ref=off

| Peak # | RetTime [min] | Type | Width [min] | Area [mAU*s] | Height [mAU] | Area %  | Peak # | RetTime [min] | Type | Width [min] | Area [mAU*s] | Height [mAU] | Area %  |
|--------|---------------|------|-------------|--------------|--------------|---------|--------|---------------|------|-------------|--------------|--------------|---------|
| 1      | 27.163        | VB   | 0.5847      | 5.41548e4    | 1325.30591   | 50.0939 | 1      | 27.153        | BV R | 0.3895      | 278.92084    | 8.52983      | 3.4318  |
| 2      | 30.889        | MM   | 0.8160      | 5.39518e4    | 1101.90552   | 49.9061 | 2      | 30.793        | BB   | 0.6014      | 7848.70605   | 197.59824    | 96.5682 |

**(E)-2-Methyl-7-phenylhept-4-en-6-yn-3-ol (2w)**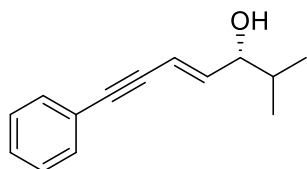Light yellow oil, 98% yield, 93% ee;  $[\alpha]_D^{25} = +5.80$  ( $c = 1.0$ ,  $\text{CHCl}_3$ ).

The enantiomeric excess was determined by HPLC on OJ-H column,

hexane: isopropanol = 95:5; flow rate = 0.9 mL/min; UV detection at

220 nm;  $t_R = 22.47$  min (minor), 26.41 min (major).  $^1\text{H}$  NMR (600MHz,  $\text{CDCl}_3$ ):  $\delta$  7.46-7.41 (m, 2H), 7.30 (dd,  $J = 5.1, 2.0$  Hz, 3H), 6.24 (dd,  $J = 15.9, 6.3$  Hz, 1H), 5.93(dd,  $J = 15.9, 1.4$  Hz, 1H), 3.98 (td,  $J = 6.3, 1.4$  Hz, 1H), 1.86-1.73 (m, 1H), 1.60 (s, 1H), 0.95 (dd,  $J =$ 10.7, 6.8 Hz, 6H).  $^{13}\text{C}$  NMR (151 MHz,  $\text{CDCl}_3$ ):  $\delta$  144.19, 131.52, 128.32, 128.20, 123.27, 110.81,89.93, 87.49, 77.38, 33.88, 18.20, 17.78. HRMS (EI)  $m/z$  Calcd. for  $\text{C}_{14}\text{H}_{15}$  ( $[\text{M}+\text{H}-\text{H}_2\text{O}]^+$ ): 183.1168.

Found: 183.1169.

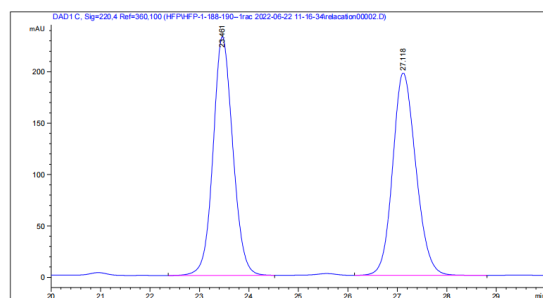

Signal 1: DAD1 C, Sig=220,4 Ref=360,100

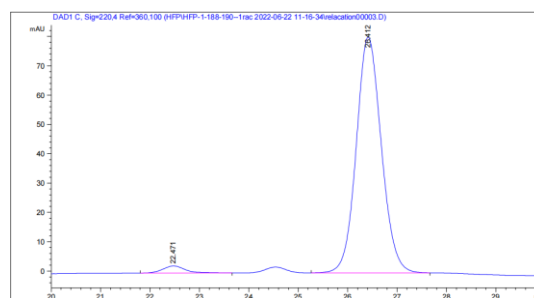

Signal 1: DAD1 C, Sig=220,4 Ref=360,100

| Peak # | RetTime [min] | Type | Width [min] | Area [mAU*s] | Height [mAU] | Area %  | Peak # | RetTime [min] | Type | Width [min] | Area [mAU*s] | Height [mAU] | Area %  |
|--------|---------------|------|-------------|--------------|--------------|---------|--------|---------------|------|-------------|--------------|--------------|---------|
| 1      | 23.461        | BB   | 0.4251      | 6433.05566   | 232.27856    | 50.0693 | 1      | 22.471        | BB   | 0.4504      | 77.36378     | 2.42352      | 2.6569  |
| 2      | 27.118        | BB   | 0.5018      | 6415.26074   | 197.05025    | 49.9307 | 2      | 26.412        | BB   | 0.5451      | 2834.46240   | 80.44243     | 97.3431 |

**(R,E)-1-cyclohexyl-5-phenylpent-2-en-4-yn-1-ol (2x)**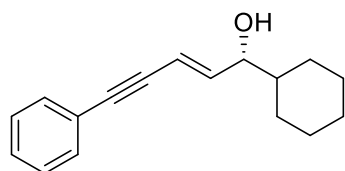95% yield, 90% ee.  $[\alpha]_D^{26} = -16.10$  ( $c = 1.0$ ,  $\text{CHCl}_3$ ). The enantio-

meric excess was determined by HPLC on Chiral OJ-3 column, 254

nm, 25 °C, "Hexane:  $i$ PrOH = 95: 5; flow 1.0 mL/min;  $t_R$  (major) =32.8 min;  $t_R$  (minor) = 28.6 min.  $^1\text{H}$  NMR (400 MHz, Chloroform- $d$ ) $\delta$  7.60 (dd,  $J = 7.8, 1.8$  Hz, 2H), 7.18 – 7.00 (m, 3H), 6.29 (dd,  $J = 15.9, 6.1$  Hz, 1H), 6.01 (dd,  $J = 15.9,$ 1.5 Hz, 1H), 3.73 – 3.59 (m, 1H), 1.87 – 1.59 (m, 5H), 1.34 – 0.93 (m, 7H).  $^{13}\text{C}$  NMR (101 MHz,Chloroform- $d$ )  $\delta$  145.33, 131.55, 128.40, 123.92, 110.15, 90.14, 88.34, 43.68, 28.74, 28.07, 26.49,

26.19, 26.15.

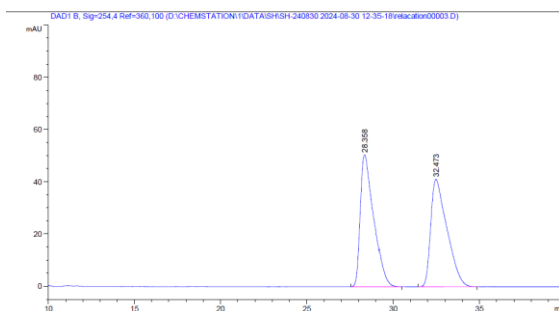

Signal 1: DAD1 B, Sig=254,4 Ref=360,100

| Peak # | RetTime [min] | Type | Width [min] | Area [mAU*s] | Height [mAU] | Area %  |
|--------|---------------|------|-------------|--------------|--------------|---------|
| 1      | 28.567        | BB   | 0.8482      | 851.78851    | 13.83654     | 4.9395  |
| 2      | 32.783        | BB   | 1.0941      | 1.63928e4    | 222.35150    | 95.0605 |

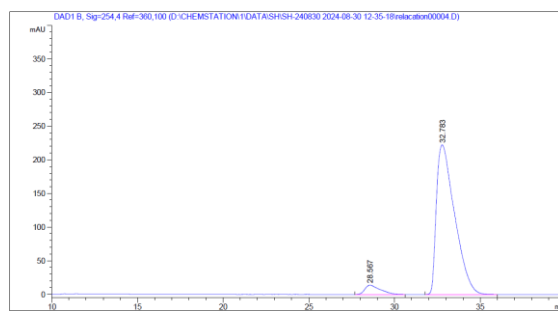

Signal 1: DAD1 B, Sig=254,4 Ref=360,100

| Peak # | RetTime [min] | Type | Width [min] | Area [mAU*s] | Height [mAU] | Area %  |
|--------|---------------|------|-------------|--------------|--------------|---------|
| 1      | 28.567        | BB   | 0.8482      | 851.78851    | 13.83654     | 4.9395  |
| 2      | 32.783        | BB   | 1.0941      | 1.63928e4    | 222.35150    | 95.0605 |

### (E)-1-cyclopropyl-5-phenylpent-2-en-4-yn-1-ol (2y)

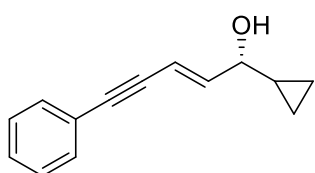

Light yellow oil, 97% yield, 53% ee;  $[\alpha]_D^{25} = +9.80$  (c = 1.0, CHCl<sub>3</sub>).

The enantiomeric excess was determined by HPLC on OD-H column, hexane: isopropanol = 90:10; flow rate = 1.0 mL/min; UV detection at

220 nm;  $t_R = 10.79$  min (minor), 13.97 min (major). <sup>1</sup>H NMR (600

MHz, CDCl<sub>3</sub>):  $\delta$  7.46-7.41 (m, 2H), 7.31 (qd,  $J = 4.1, 1.3$  Hz, 3H), 6.32 (dd,  $J = 15.9, 5.6$  Hz, 1H), 5.98

(dd,  $J = 15.9, 1.5$  Hz, 1H), 3.58 (ddd,  $J = 8.2, 5.6, 1.5$  Hz, 1H), 1.61 (br, 1H), 1.03 (qt,  $J = 8.2, 4.9$  Hz,

1H), 0.64-0.54 (m, 2H), 0.43-0.38 (m, 1H), 0.34-0.29 (m, 1H). <sup>13</sup>C NMR (151 MHz, CDCl<sub>3</sub>):  $\delta$  141.90,

129.33, 126.12, 126.00, 121.09, 107.63, 87.91, 85.25, 74.18, 15.18, 1.02. HRMS (EI) m/z Calcd. for

C<sub>14</sub>H<sub>13</sub> ([M+H-H<sub>2</sub>O]<sup>+</sup>): 181.1012. Found: 181.1011.

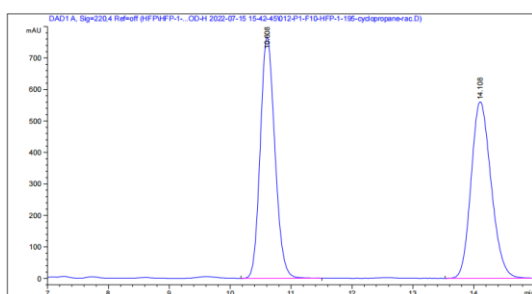

Signal 1: DAD1 A, Sig=220,4 Ref=off

| Peak # | RetTime [min] | Type | Width [min] | Area [mAU*s] | Height [mAU] | Area %  |
|--------|---------------|------|-------------|--------------|--------------|---------|
| 1      | 10.608        | BV R | 0.2603      | 1.27569e4    | 765.91907    | 49.8791 |
| 2      | 14.108        | BV R | 0.3508      | 1.28188e4    | 560.59119    | 50.1209 |

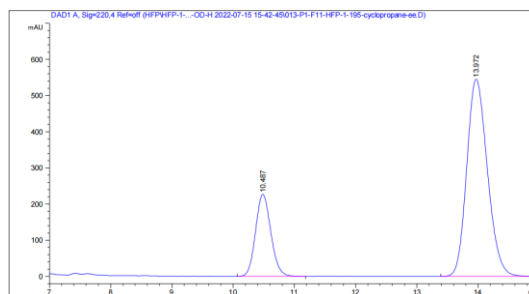

Signal 1: DAD1 A, Sig=220,4 Ref=off

| Peak # | RetTime [min] | Type | Width [min] | Area [mAU*s] | Height [mAU] | Area %  |
|--------|---------------|------|-------------|--------------|--------------|---------|
| 1      | 10.487        | BV R | 0.2697      | 3917.98242   | 226.57425    | 23.4870 |
| 2      | 13.972        | BV R | 0.3650      | 1.27635e4    | 545.41449    | 76.5130 |

**(E)-1,5-diphenyl-1λ<sup>3</sup>-pent-2-en-4-yn-1-ol (2z)**<sup>[10]</sup>

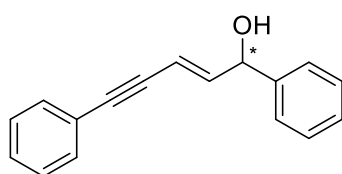

55% yield, 63% ee,  $[\alpha]_D^{26} = 17.50$  (c = 1.0, CHCl<sub>3</sub>). The enantiomeric excess was determined by HPLC on Chiral IF column, 254 nm, 25 °C, <sup>n</sup>Hexane: <sup>i</sup>PrOH = 95: 5; flow 1.0 mL/min;  $t_R$  (major) = 14.1 min;  $t_R$  (minor) = 16.4 min. <sup>1</sup>H NMR (400 MHz, Chloroform-*d*)  $\delta$  7.54 (dd,  $J = 7.6, 2.1$  Hz, 2H), 7.29 – 7.27 (m, 1H), 7.25 – 7.13 (m, 4H), 7.07 (q,  $J = 5.3$  Hz, 3H), 6.38 (dd,  $J = 15.8, 5.7$  Hz, 1H), 6.12 (dd,  $J = 15.7, 1.6$  Hz, 1H), 4.90 (d,  $J = 5.7$  Hz, 1H).

<sup>13</sup>C NMR (101 MHz, Chloroform-*d*)  $\delta$  94.40, 91.63, 80.84, 77.73, 76.90, 75.71, 73.05, 58.95, 40.07, 37.31, 23.32.

**(E)-4-ethyl-6-phenylhex-3-en-5-yn-2-ol (2aa)**

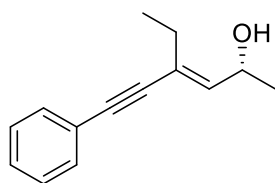

Light yellow oil, 90% yield, 96% ee;  $[\alpha]_D^{25} = +40.00$  (c = 1.0, CHCl<sub>3</sub>). The enantiomeric excess was determined by HPLC on OD-H column, hexane: isopropanol = 95:5; flow rate = 1.0 mL/min; UV detection at 210 nm;  $t_R$  = 8.89 min (minor), 10.80 min (major). <sup>1</sup>H NMR (600 MHz, CDCl<sub>3</sub>):  $\delta$  7.48-7.41 (m, 2H), 7.30 (qd,  $J = 4.8, 1.7$  Hz, 3H), 5.91 (d,  $J = 8.9$  Hz, 1H), 4.68 (dq,  $J = 8.9, 6.3$  Hz, 1H), 2.29 (q,  $J = 7.6$  Hz, 2H), 1.57 (br, 1H), 1.31 (d,  $J = 6.3$  Hz, 3H), 1.18 (t,  $J = 7.6$  Hz, 3H). <sup>13</sup>C NMR (151 MHz, CDCl<sub>3</sub>):  $\delta$  139.80, 131.56, 128.29, 128.09, 126.17, 123.36, 90.35, 88.54, 64.32, 24.52, 23.44, 13.54. HRMS (EI)  $m/z$  Calcd. for C<sub>14</sub>H<sub>15</sub> ([M+H-H<sub>2</sub>O]<sup>+</sup>): 183.1168. Found: 183.1168.

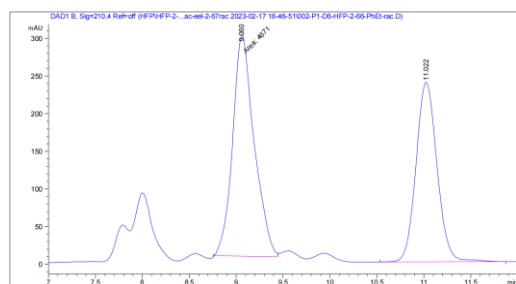

Signal 1: DAD1 B, Sig=210,4 Ref=off

| Peak # | RetTime [min] | Type | Width [min] | Area [mAU*s] | Height [mAU] | Area %  |
|--------|---------------|------|-------------|--------------|--------------|---------|
| 1      | 9.060         | MM   | 0.2655      | 4671.00391   | 293.24487    | 55.6950 |
| 2      | 11.022        | BB   | 0.2420      | 3715.75684   | 238.25311    | 44.3050 |

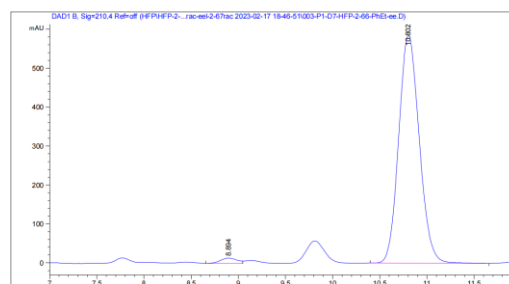

Signal 1: DAD1 B, Sig=210,4 Ref=off

| Peak # | RetTime [min] | Type | Width [min] | Area [mAU*s] | Height [mAU] | Area %  |
|--------|---------------|------|-------------|--------------|--------------|---------|
| 1      | 8.894         | BV   | 0.1831      | 164.63252    | 13.42265     | 1.8242  |
| 2      | 10.802        | BB   | 0.2367      | 8860.26074   | 584.98914    | 98.1758 |

#### IV. Gram-scale reaction and transformation of products

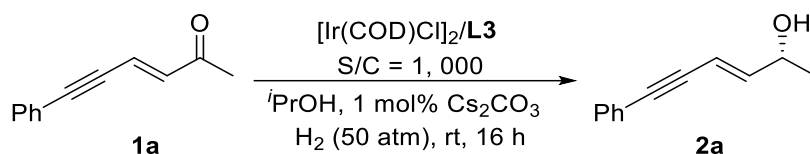

**Asymmetric hydrogenation of (*E*)-6-phenylhex-3-en-5-yn-2-one at S/C = 1000:** To a 2.5 mL vial was added the catalyst precursor  $[\text{Ir}(\text{COD})\text{Cl}]_2$  (3.4 mg, 0.005 mmol), ligands (**L3**, 0.011 mmol) and anhydrous  $i\text{PrOH}$  (1.0 mL) under argon atmosphere. The mixture was stirred for 3 h at 25 °C giving orange red solution in the argon-filled glovebox. An aliquot of the catalyst solution (580  $\mu\text{L}$ , 0.0058 mmol) was transferred into a 50 mL hydrogenation vessel, then  $\text{Cs}_2\text{CO}_3$  (1.9 mg, 0.06 mmol), ketone (5.8 mmol, 1.0 g) and anhydrous  $i\text{PrOH}$  (10 mL) was added. The vessel was placed in an autoclave which was then charged with 50 atm of  $\text{H}_2$  and stirred at 25-30 °C for 16 h. The work-up was identical to that described for the asymmetric hydrogenation at  $\text{S/C} = 1,000$ . (*R*)-(*E*)-6-phenylhex-3-en-5-yn-2-ol (**2a**): 95% yield, 90% ee.

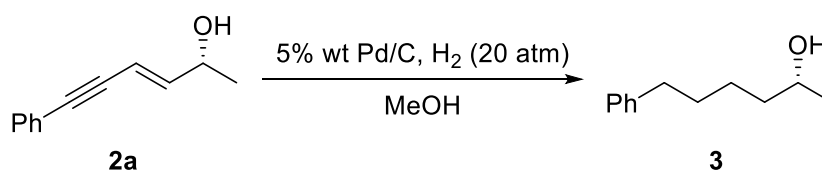

**Hydrogenation of (*R*)-(*E*)-6-phenylhex-3-en-5-yn-2-ol (**2a**):** In a 2.5 mL vial was added the (*R*)-(*E*)-6-phenylhex-3-en-5-yn-2-ol (**2a**) (17.0 mg, 0.1 mmol) and 5% wt Pd/C (1 mg) and 1 mL MeOH, Then the vial was placed in an autoclave which was then charged with 20 atm of  $\text{H}_2$  and stirred at 25-30 °C for 12 h. The hydrogen gas was released slowly in a well-ventilated hood and the solution was concentrated and passed through a short column of silica gel to get the product in almost quantitative yield (16.9 mg, 99% yield).<sup>[11]</sup> The yield was determined by  $^1\text{H}$  NMR analysis. The product was analyzed by chiral HPLC for determination of ee values (85% ee).

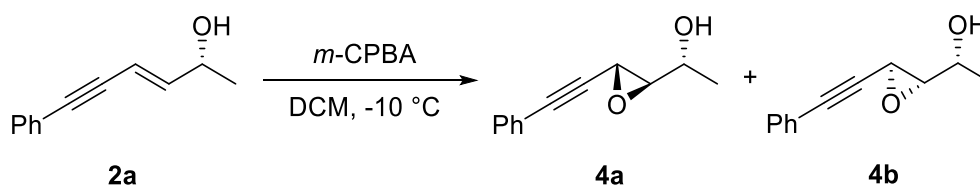

**Oxidation of (*R*)-(*E*)-6-phenylhex-3-en-5-yn-2-ol (**2a**):** To a solution of **2a** (0.10 mmol, 1.00 eq.) in DCM (2 mL) at 0 °C was added  $m$ -chloroperbenzoic acid (0.20 mmol, 2.00 eq.). After 0.5 h, the resulting solution was stirred at room temperature for 24 h until complete consumption of starting

material (verified by TLC). The mixture was washed with 10% solution of Na<sub>2</sub>CO<sub>3</sub> (2 mL) and then extracted with DCM (2 mL). The organic layer was dried with Na<sub>2</sub>SO<sub>4</sub> and the solvent was removed under reduced pressure. The crude product was purified by flash chromatography on silica to afford product **4** as mixtures of two diastereomers (**4a**, 57% yield, 90% ee; **4b**, 38% yield, 90% ee).<sup>[6,7]</sup> Mixture of two diastereoisomers that could not be separated by flash chromatography.

### (*R*)-6-phenylhexan-2-ol (**3**)<sup>[11]</sup>

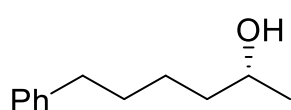

Colorless oil, 16.9 mg, 99% yield, 85% ee; [ $\alpha$ ]<sub>D</sub><sup>25</sup> = -5.50 (c = 1.0, CHCl<sub>3</sub>). The enantiomeric excess was determined by HPLC on OD-H column, hexane: isopropanol = 90:10; flow rate = 0.9 mL/min; UV detection at 210 nm; t<sub>R</sub> = 6.22 min (minor), 6.77 min (major). <sup>1</sup>H NMR (600 MHz, CDCl<sub>3</sub>)  $\delta$ : 7.29-7.26 (m, 2H), 7.20-7.15 (m, 3H), 3.82-3.74 (m, 1H), 2.62 (t, *J* = 7.7 Hz, 2H), 1.71-1.58 (m, 2H), 1.52-1.42 (m, 3H), 1.35 (m, 2H), 1.18 (d, *J* = 6.2 Hz, 3H). <sup>13</sup>C NMR (151 MHz, CDCl<sub>3</sub>)  $\delta$ : 142.59, 128.39, 128.28, 125.66, 68.09, 39.18, 35.92, 31.48, 25.44, 23.53.

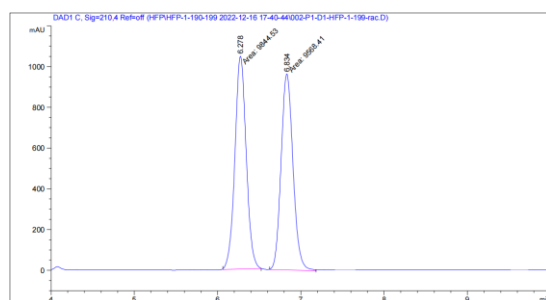

Signal 1: DAD1 C, Sig=210,4 Ref=off

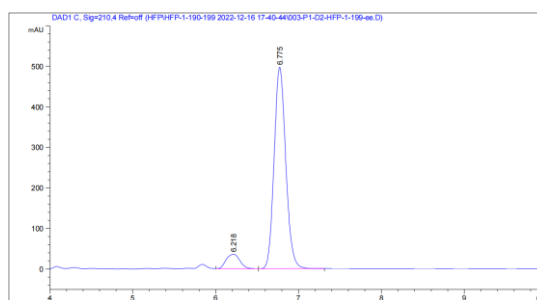

Signal 1: DAD1 C, Sig=210,4 Ref=off

| Peak # | RetTime [min] | Type | Width [min] | Area [mAU*s] | Height [mAU] | Area %  | Peak # | RetTime [min] | Type | Width [min] | Area [mAU*s] | Height [mAU] | Area %  |
|--------|---------------|------|-------------|--------------|--------------|---------|--------|---------------|------|-------------|--------------|--------------|---------|
| 1      | 6.278         | MM   | 0.1569      | 9844.52539   | 1045.52209   | 50.7112 | 1      | 6.218         | BB   | 0.1863      | 409.39331    | 35.56622     | 7.7782  |
| 2      | 6.834         | MM   | 0.1656      | 9568.40625   | 962.74890    | 49.2888 | 2      | 6.775         | BB   | 0.1519      | 4853.94238   | 497.38000    | 92.2218 |

### 1-(3-(phenylethynyl)oxiran-2-yl)ethan-1-ol (**4**)<sup>[12, 13]</sup>

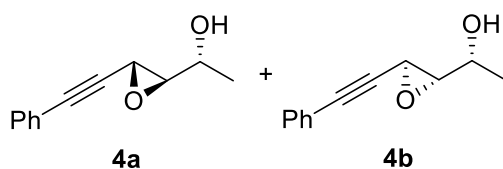

Light yellow oil (17.0 mg, 95% total yield), 57% yield, 90% ee for the major diastereoisomer (**4a**): <sup>1</sup>H NMR (600 MHz, CDCl<sub>3</sub>)  $\delta$  7.45 (m, 2H), 7.32 (m, 3H), 3.81 (m, 1H), 3.61 (d, *J* = 2.2 Hz, 1H), 3.26 (dd, *J* = 2.2 Hz, 1H), 1.88 (s, 1H), 1.36 (d, *J* = 6.5 Hz, 5H). <sup>13</sup>C NMR (151 MHz, CDCl<sub>3</sub>)  $\delta$  131.91, 128.89, 128.35, 121.85, 84.90, 84.22, 66.42, 64.03, 44.03, 20.04. The enantiomeric excess was determined by HPLC on OD-H column, hexane: isopropanol = 95:5; flow rate = 1.0 mL/min; UV detection

at 210 nm;  $t_R = 33.65$  min (minor), 37.08 min (major).

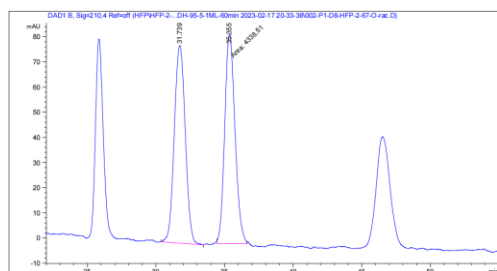

Signal 1: DAD1 B, Sig=210,4 Ref=off

| Peak # | RetTime [min] | Type | Width [min] | Area [mAU*s] | Height [mAU] | Area %  |
|--------|---------------|------|-------------|--------------|--------------|---------|
| 1      | 31.739        | BB   | 0.8203      | 4368.71826   | 78.62385     | 50.1735 |
| 2      | 35.355        | MM   | 0.8670      | 4338.51221   | 83.40285     | 49.8265 |

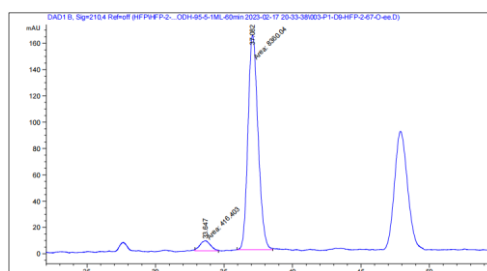

Signal 1: DAD1 B, Sig=210,4 Ref=off

| Peak # | RetTime [min] | Type | Width [min] | Area [mAU*s] | Height [mAU] | Area %  |
|--------|---------------|------|-------------|--------------|--------------|---------|
| 1      | 33.647        | MM   | 0.9111      | 416.40338    | 7.61730      | 4.7446  |
| 2      | 37.082        | MM   | 0.8552      | 8360.03613   | 162.93330    | 95.2554 |

38% yield and 90% ee for the minor diastereoisomer (**4b**):  $^1\text{H}$  NMR (600 MHz,  $\text{CDCl}_3$ )  $\delta$  7.45 (m, 2H), 7.32 (m, 3H), 4.06 (m, 1H), 3.68 (d,  $J = 2.5$  Hz, 1H), 3.30 (t,  $J = 2.5$  Hz, 1H), 1.94 (s, 1H), 1.33 (d,  $J = 6.5$  Hz, 3H).  $^{13}\text{C}$  NMR (151 MHz,  $\text{CDCl}_3$ )  $\delta$  131.89, 128.87, 128.41, 121.89, 85.17, 84.20, 64.17, 63.52, 42.30, 18.56. The enantiomeric excess was determined by HPLC on OD-H column, hexane:isopropanol = 95:5; flow rate = 1.0 mL/min; UV detection at 210 nm;  $t_R = 27.62$  min (minor), 47.89 min (major).

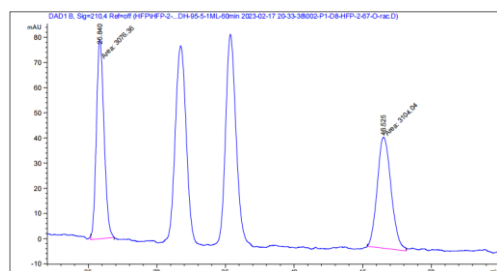

Signal 1: DAD1 B, Sig=210,4 Ref=off

| Peak # | RetTime [min] | Type | Width [min] | Area [mAU*s] | Height [mAU] | Area %  |
|--------|---------------|------|-------------|--------------|--------------|---------|
| 1      | 25.840        | MM   | 0.6469      | 3076.36108   | 79.26109     | 49.7761 |
| 2      | 46.525        | MM   | 1.1725      | 3104.03516   | 44.12152     | 50.2239 |

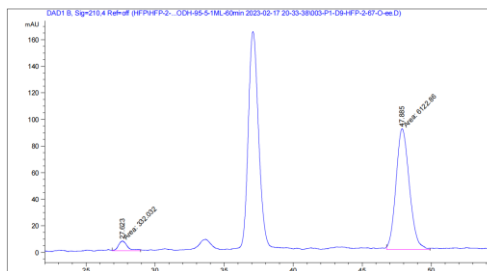

Signal 1: DAD1 B, Sig=210,4 Ref=off

| Peak # | RetTime [min] | Type | Width [min] | Area [mAU*s] | Height [mAU] | Area %  |
|--------|---------------|------|-------------|--------------|--------------|---------|
| 1      | 27.623        | MM   | 0.7632      | 332.03229    | 7.25124      | 5.1439  |
| 2      | 47.885        | MM   | 1.1230      | 6122.85742   | 90.86827     | 94.8561 |

## V. NMR spectra of all the compounds

$^1\text{H}$  NMR spectra (600 MHz,  $\text{CDCl}_3$ ) of **1a**

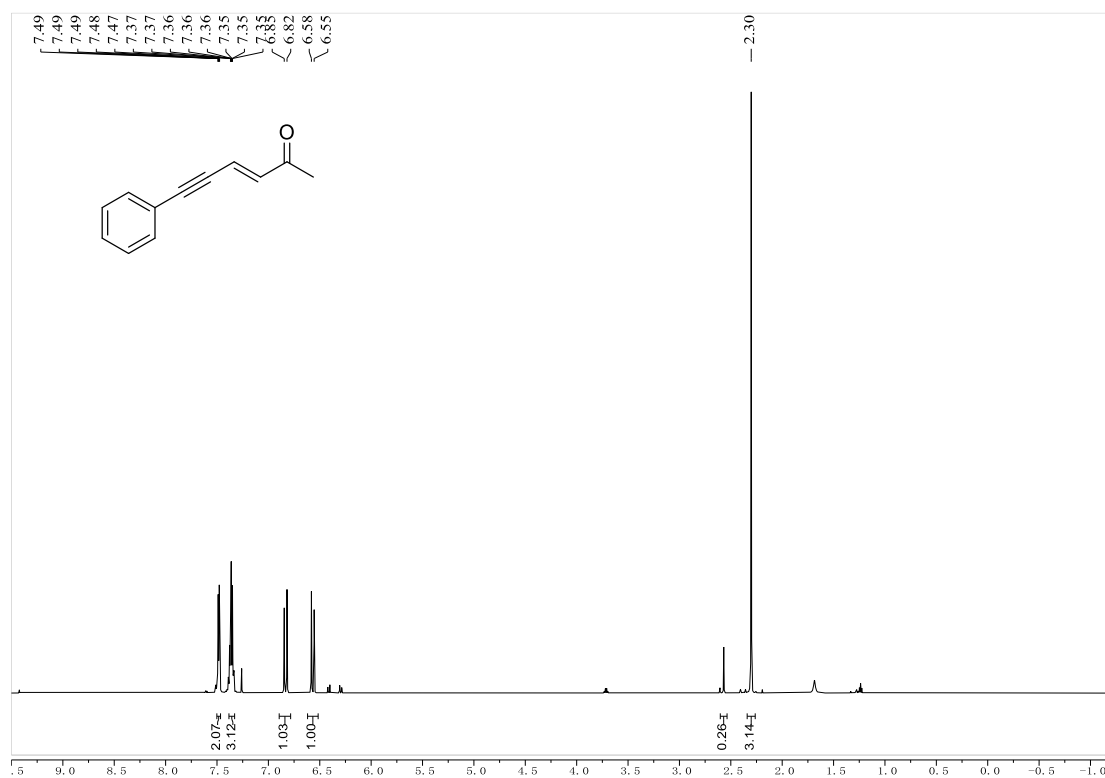

$^{13}\text{C}$  NMR spectra (151 MHz,  $\text{CDCl}_3$ ) of **1a**

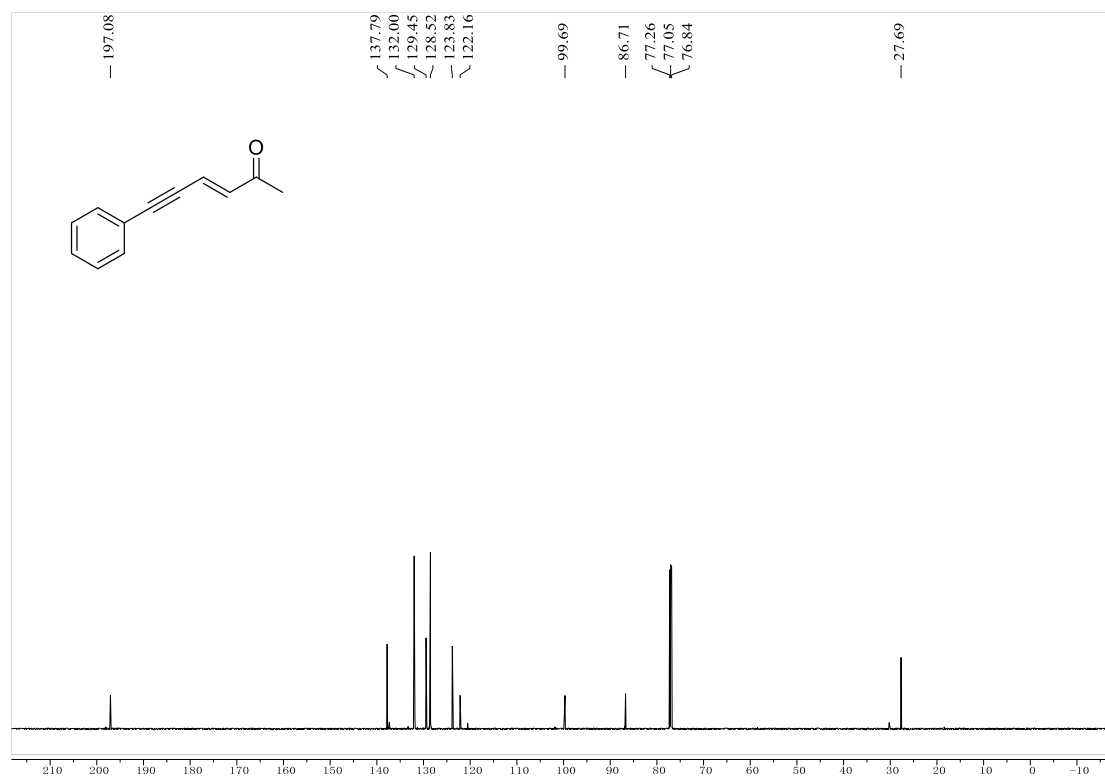



<sup>1</sup>H NMR spectra (600 MHz, CDCl<sub>3</sub>) of **1b**

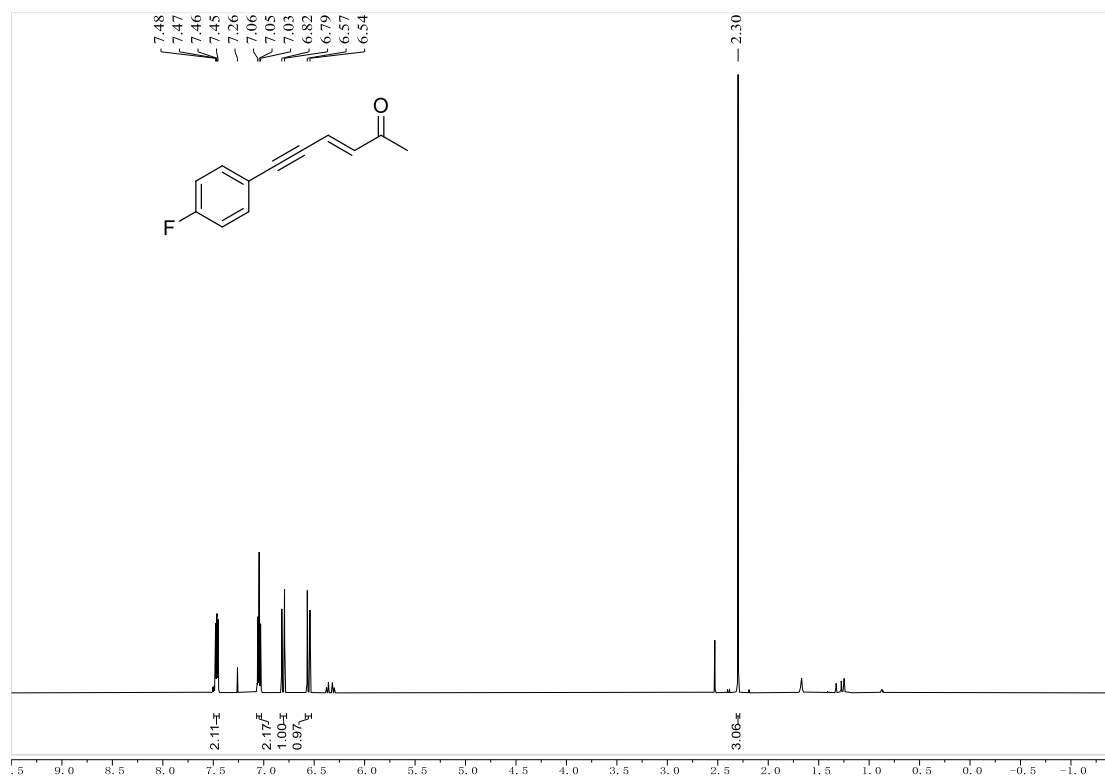

<sup>13</sup>C NMR spectra (151 MHz, CDCl<sub>3</sub>) of **1b**

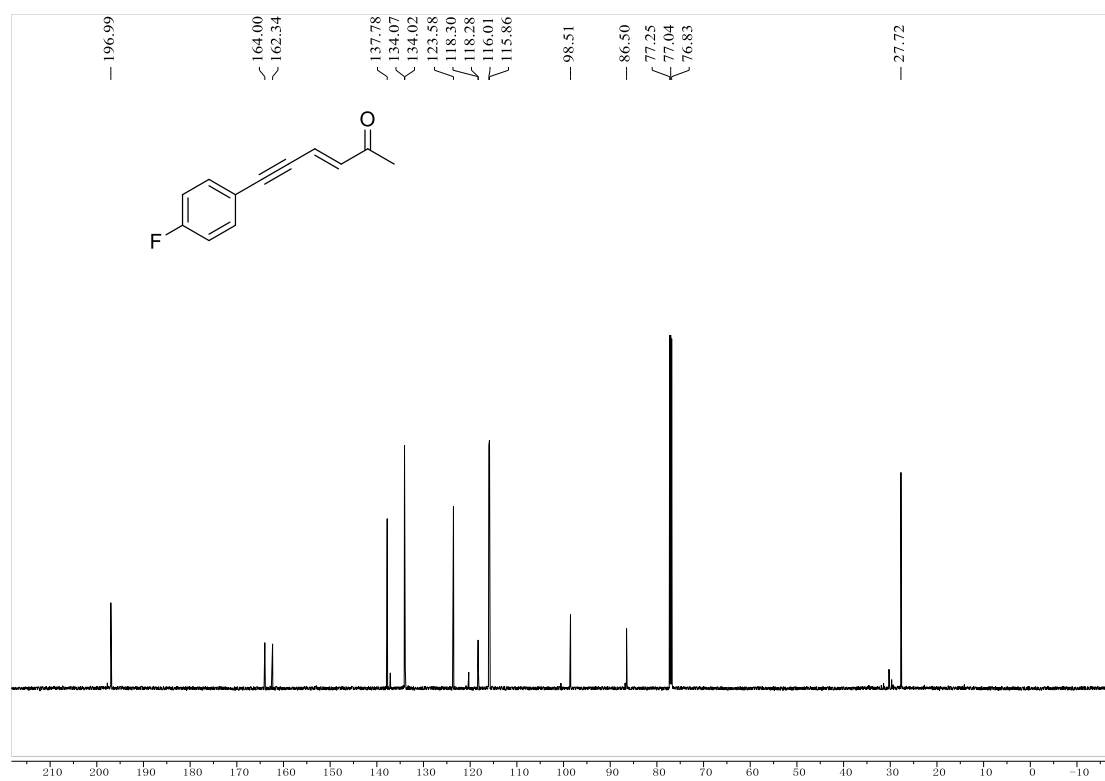

$^{13}\text{F}$  NMR spectra (376 MHz,  $\text{CDCl}_3$ ) of **1b**

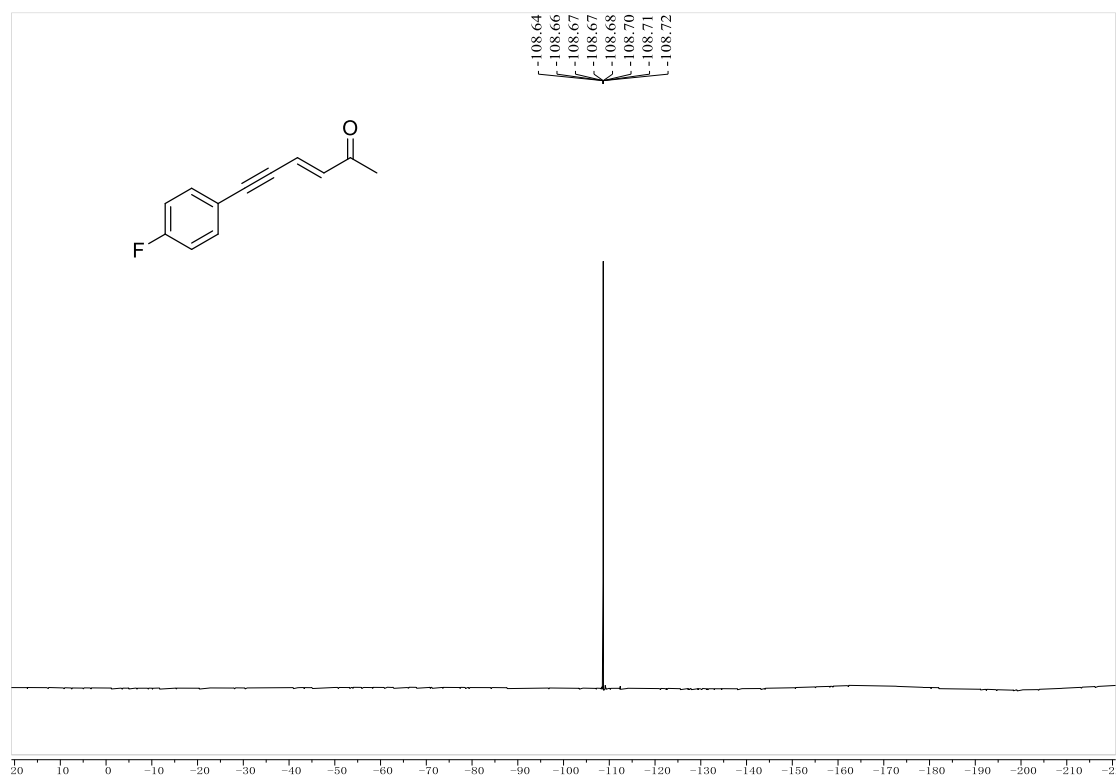

$^1\text{H}$  NMR spectra (600 MHz,  $\text{CDCl}_3$ ) of **1c**

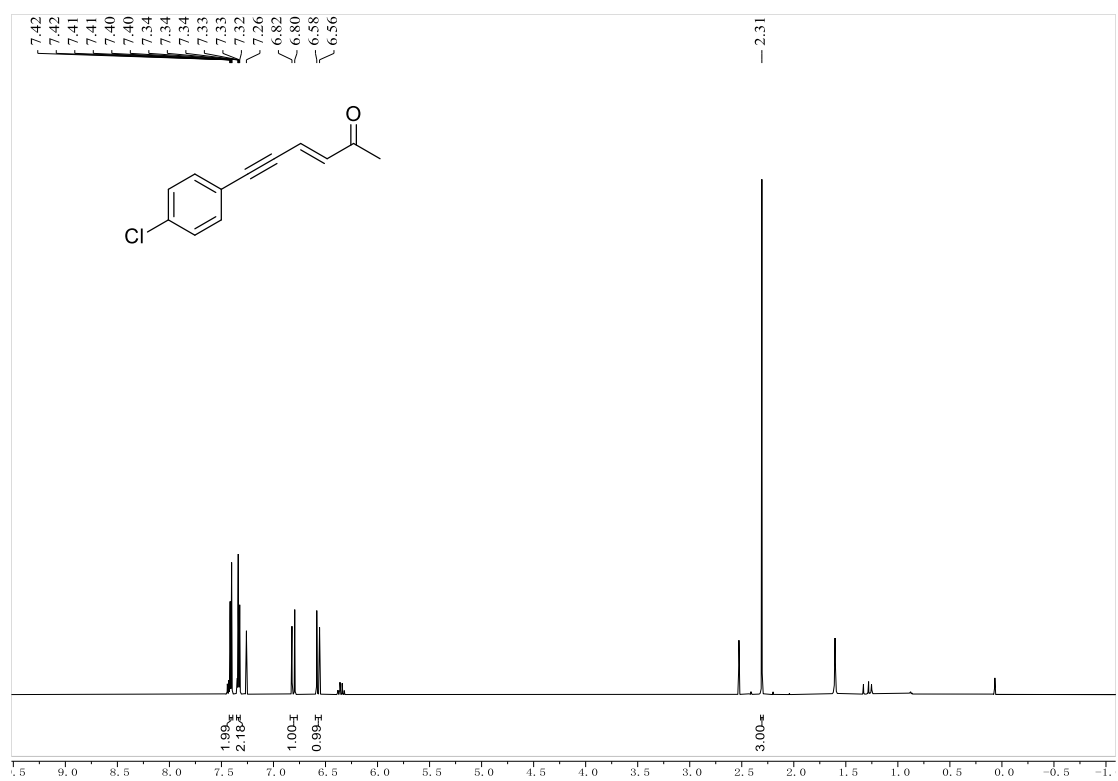

$^{13}\text{C}$  NMR spectra (151 MHz,  $\text{CDCl}_3$ ) of **1c**

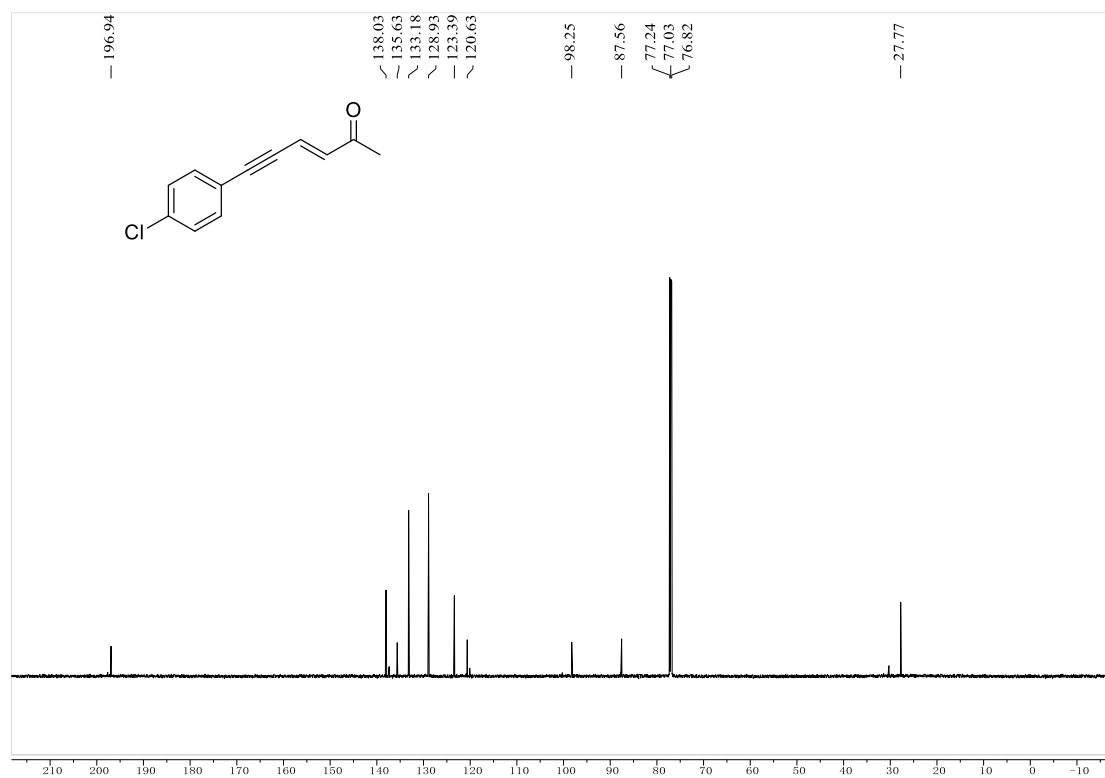

$^1\text{H}$  NMR spectra (600 MHz,  $\text{CDCl}_3$ ) of **1d**

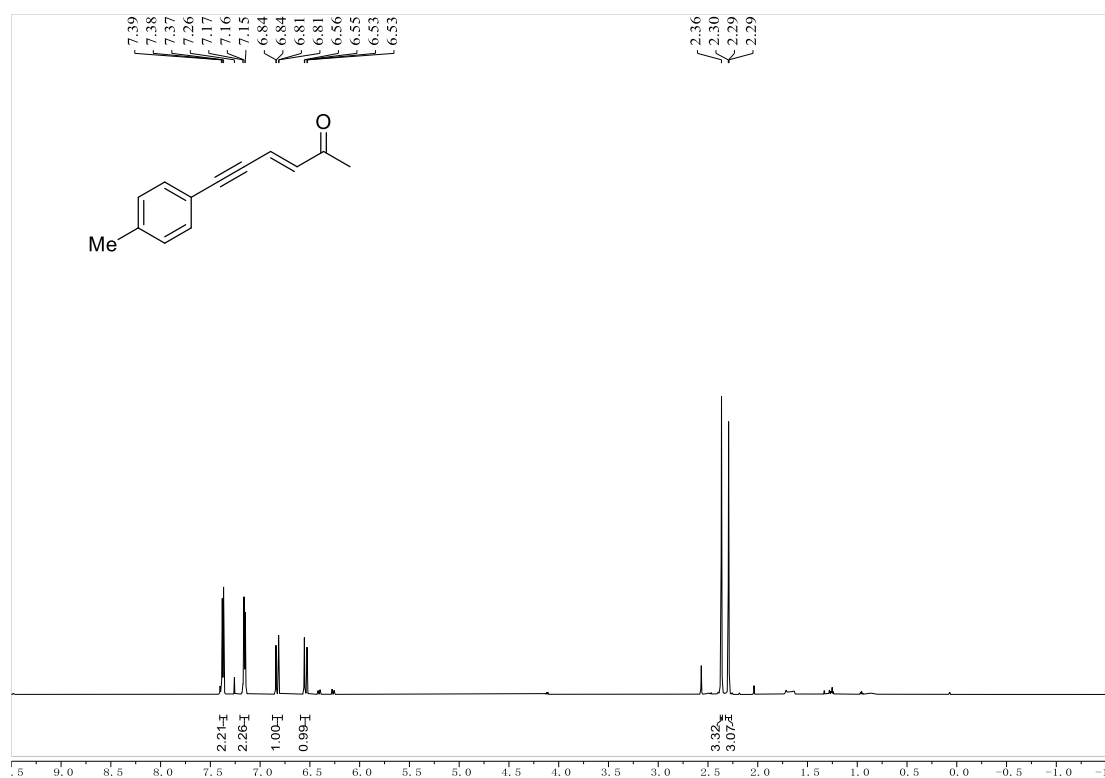

$^{13}\text{C}$  NMR spectra (151 MHz,  $\text{CDCl}_3$ ) of **1d**

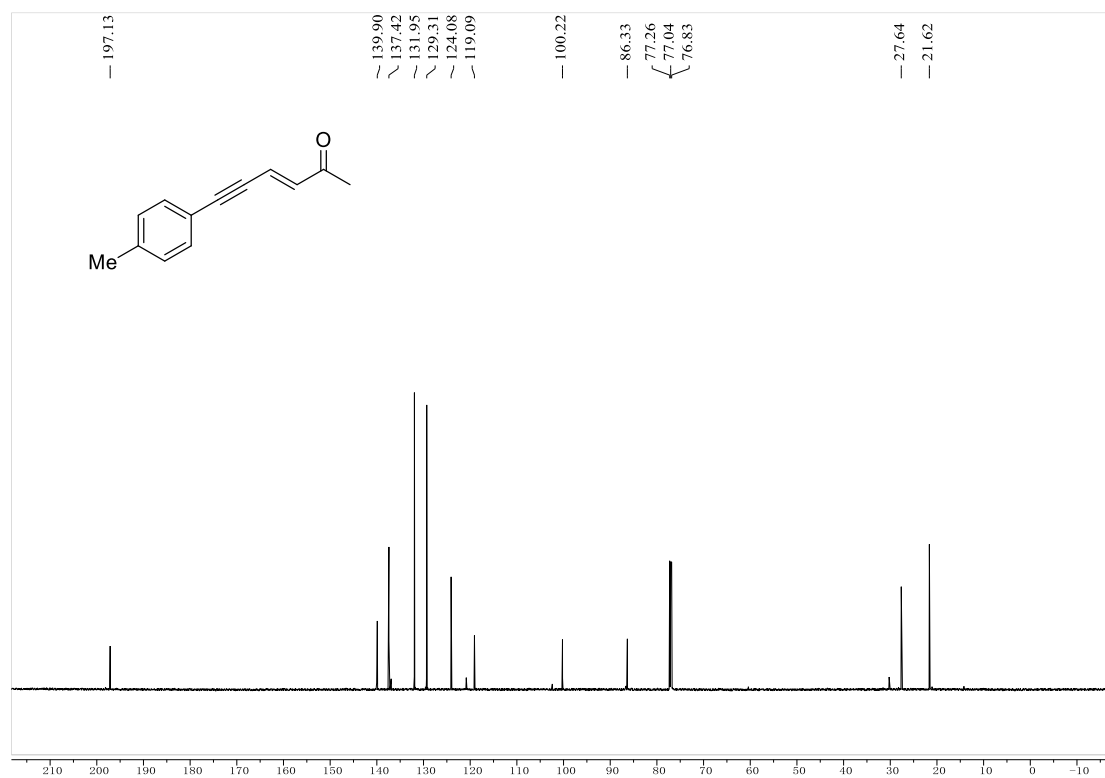

$^1\text{H}$  NMR spectra (600 MHz,  $\text{CDCl}_3$ ) of **1e**

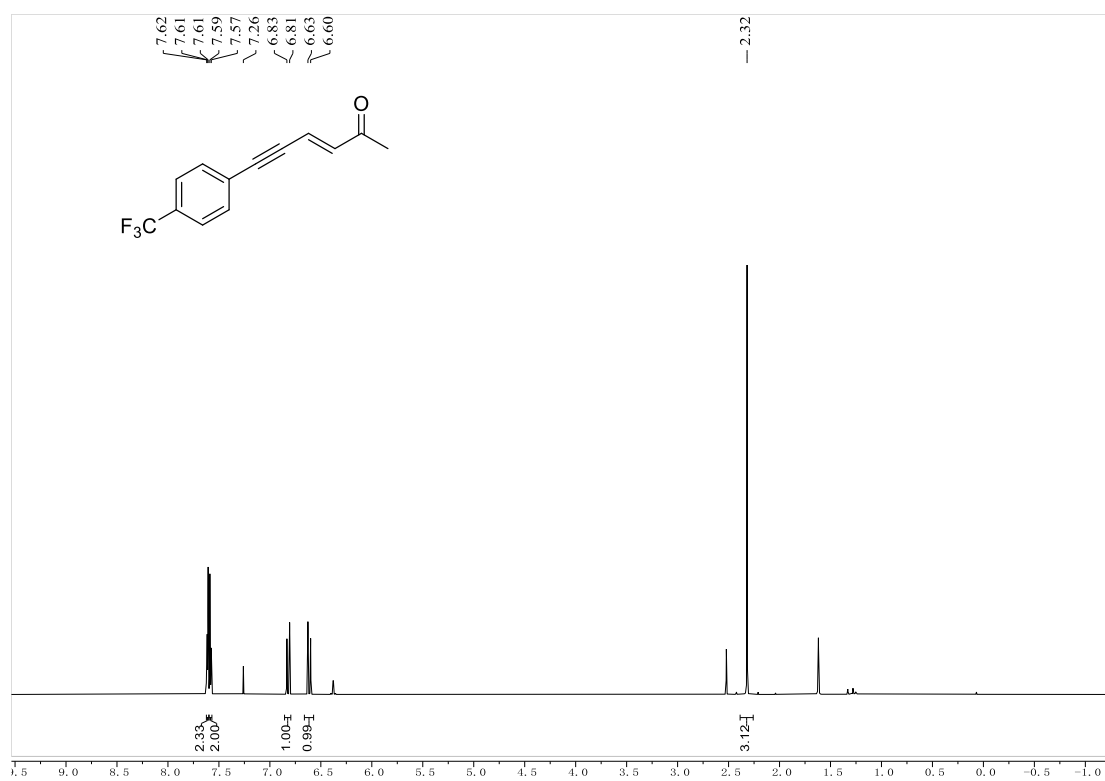

<sup>13</sup>C NMR spectra (151 MHz, CDCl<sub>3</sub>) of **1e**

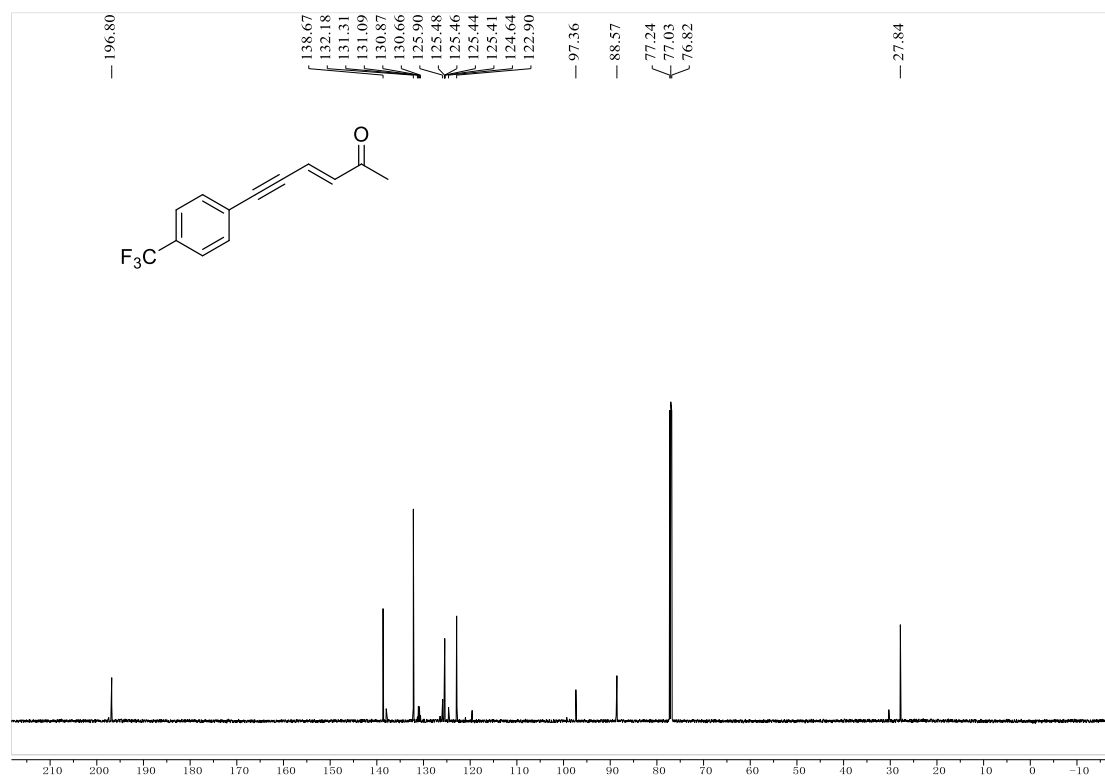

<sup>19</sup>F NMR spectra (376 MHz, CDCl<sub>3</sub>) of **1e**

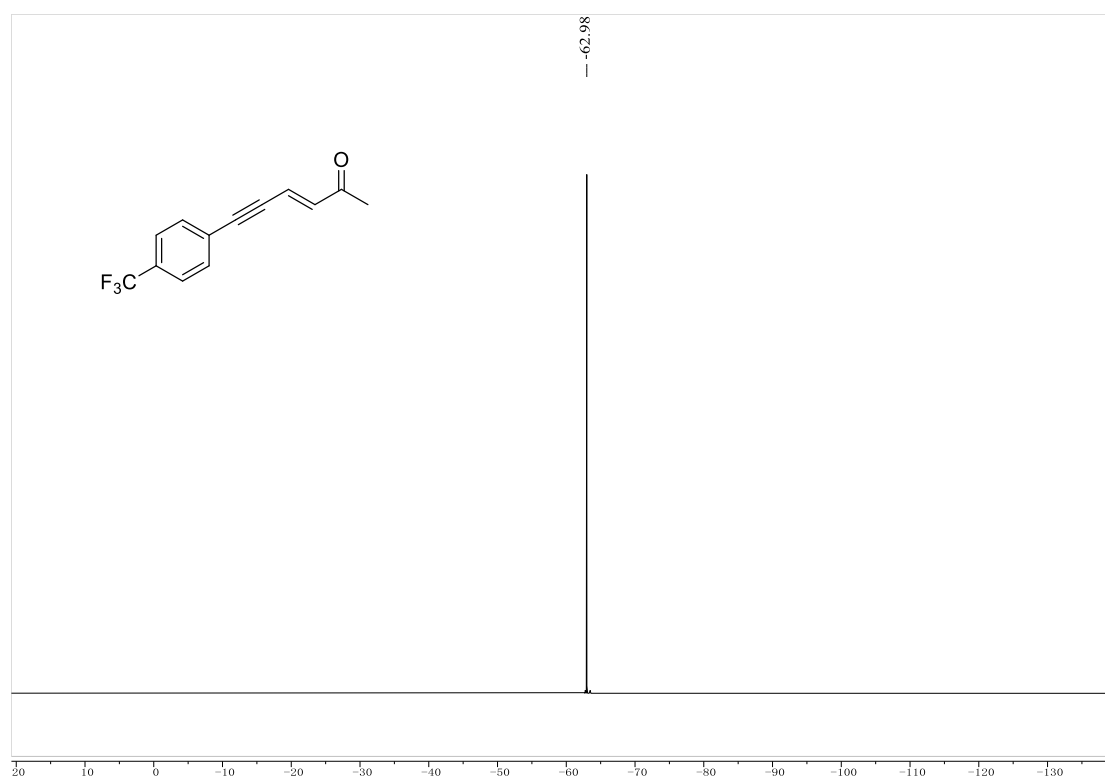

<sup>1</sup>H NMR spectra (600 MHz, CDCl<sub>3</sub>) of **1f**

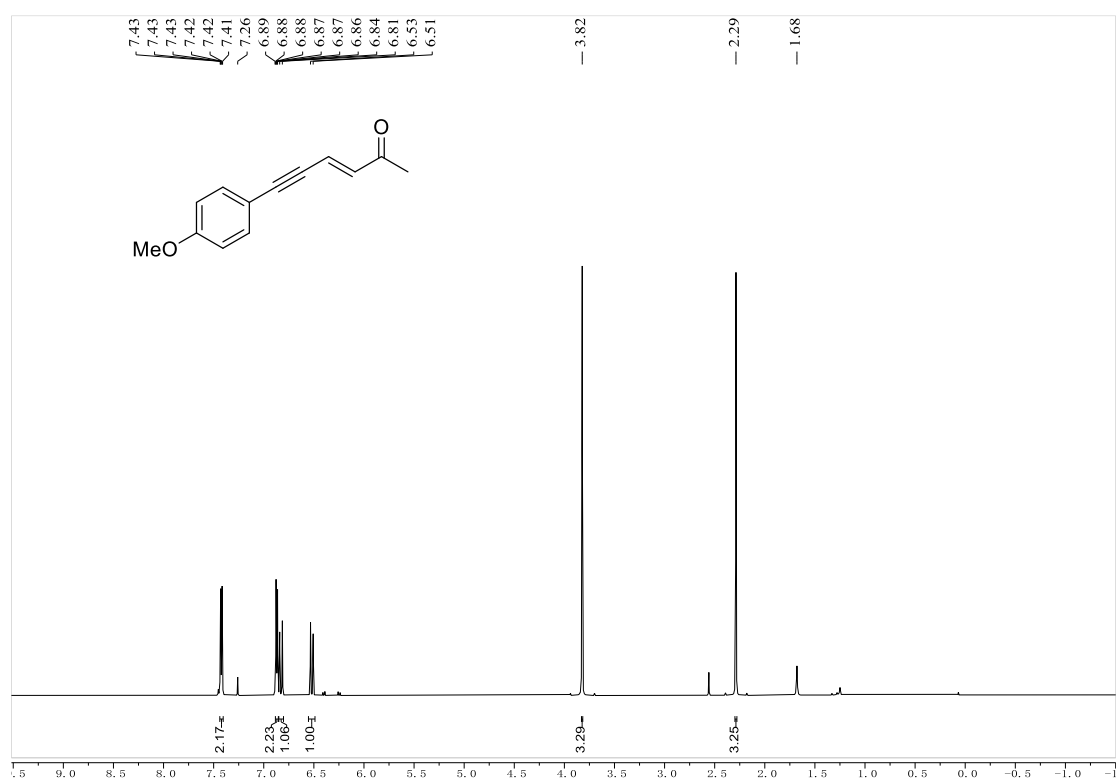

<sup>13</sup>C NMR spectra (151 MHz, CDCl<sub>3</sub>) of **1f**

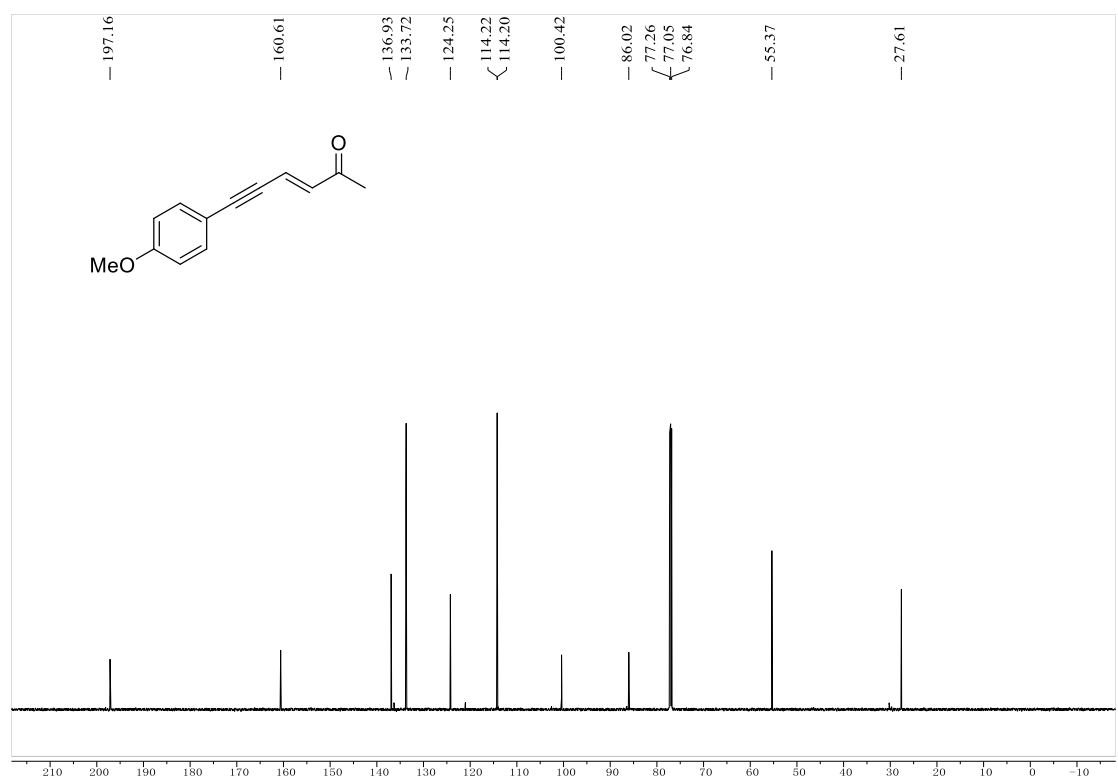

<sup>1</sup>H NMR spectra (600 MHz, CDCl<sub>3</sub>) of **1g**

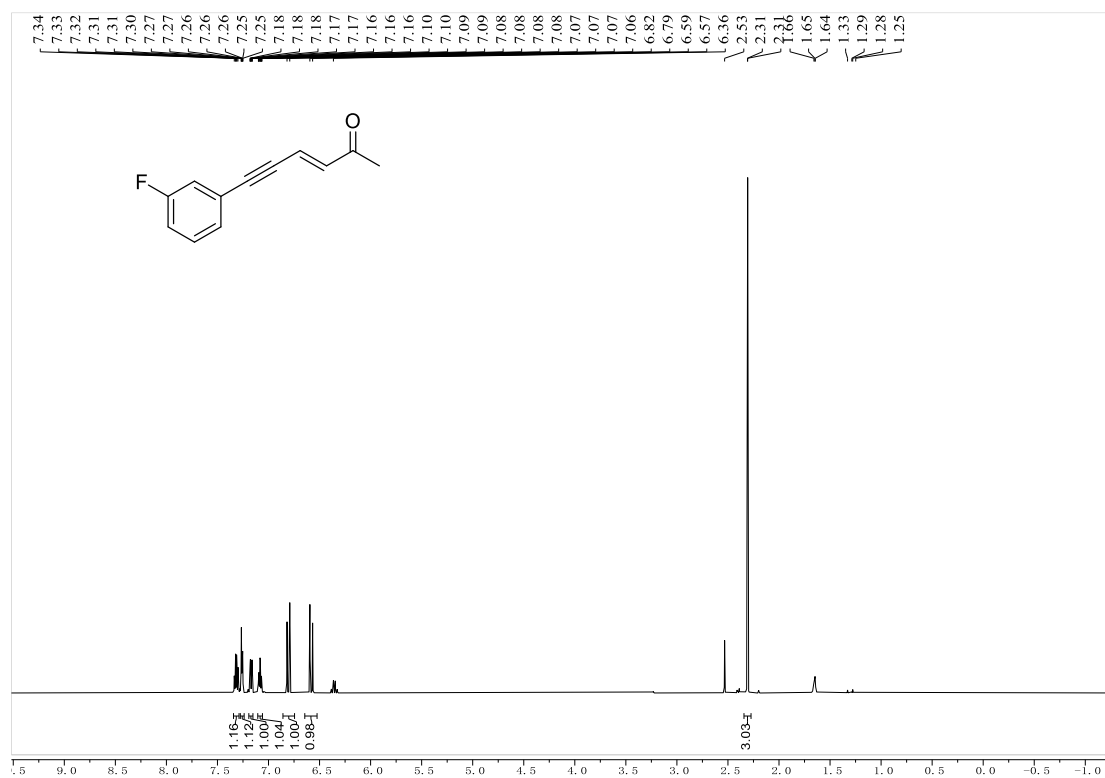

<sup>13</sup>C NMR spectra (151 MHz, CDCl<sub>3</sub>) of **1g**

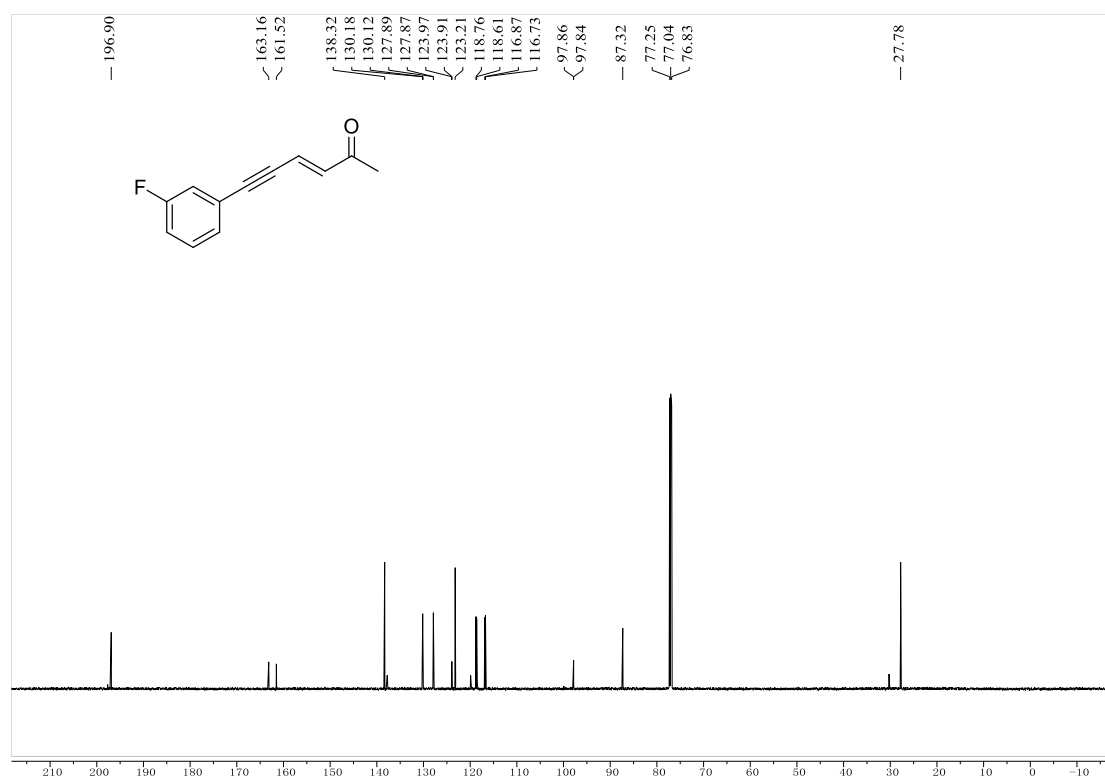

<sup>19</sup>F NMR spectra (376 MHz, CDCl<sub>3</sub>) of **1g**

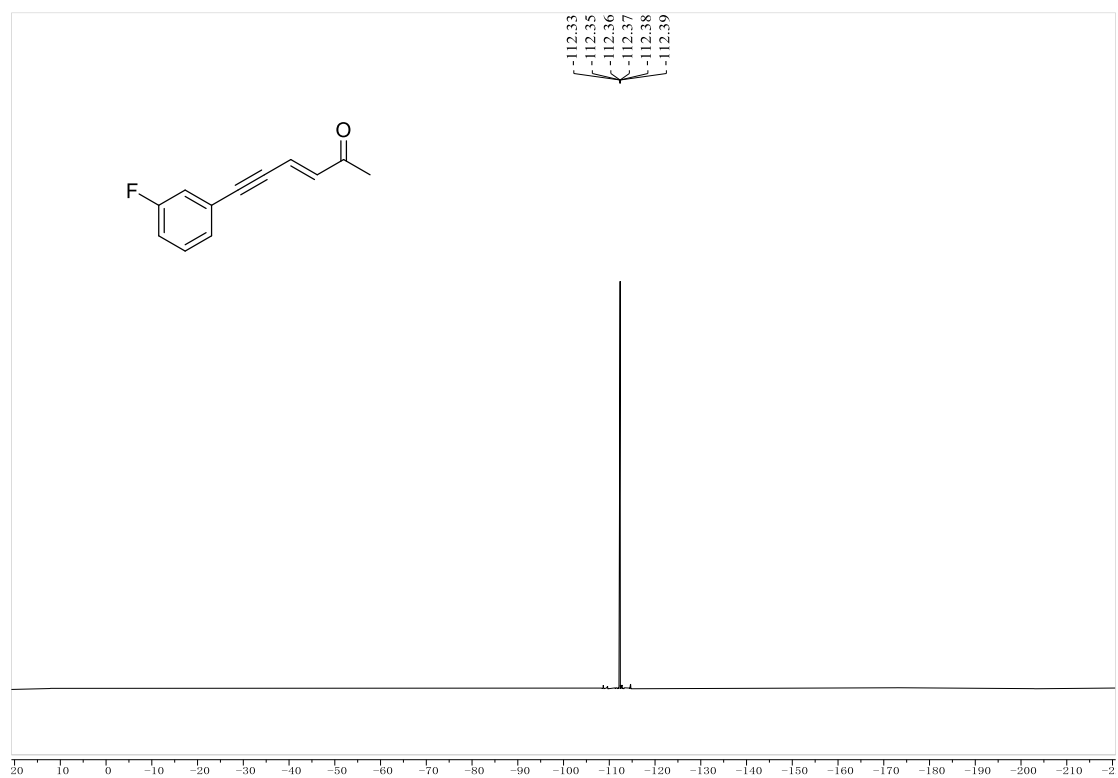

<sup>1</sup>H NMR spectra (600 MHz, CDCl<sub>3</sub>) of **1h**

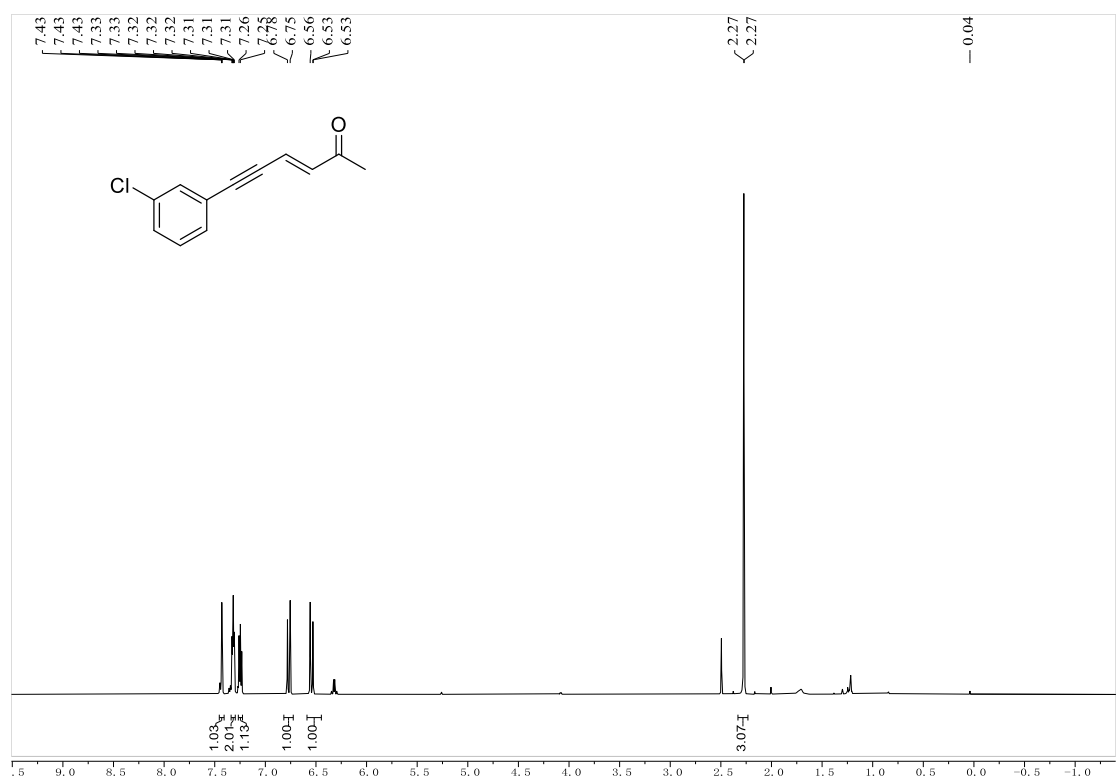



$^{13}\text{C}$  NMR spectra (151 MHz,  $\text{CDCl}_3$ ) of **1h**

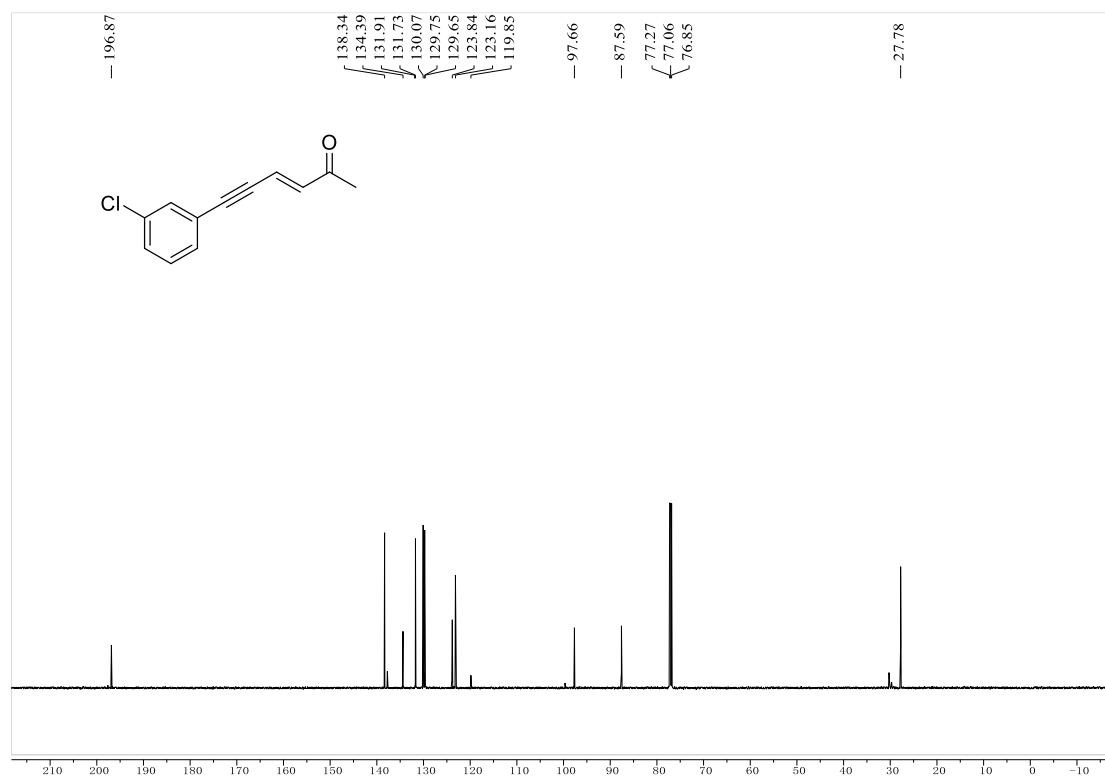

$^1\text{H}$  NMR spectra (600 MHz,  $\text{CDCl}_3$ ) of **1i**

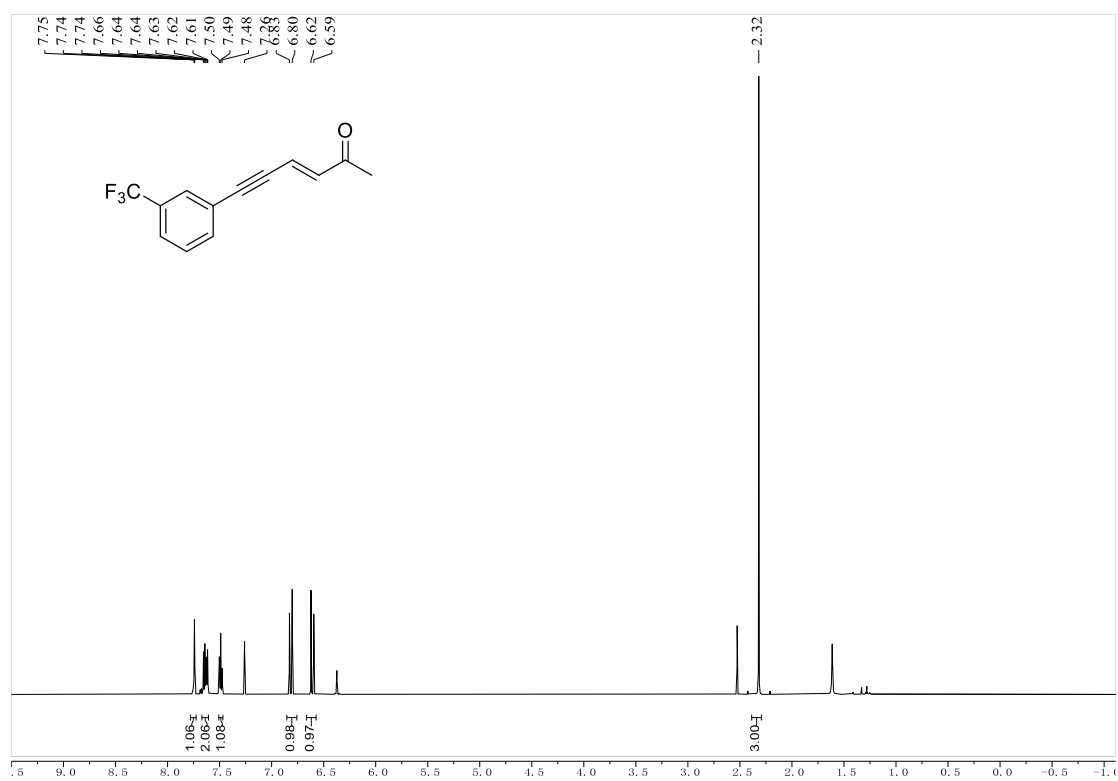

<sup>13</sup>C NMR spectra (151 MHz, CDCl<sub>3</sub>) of **1i**

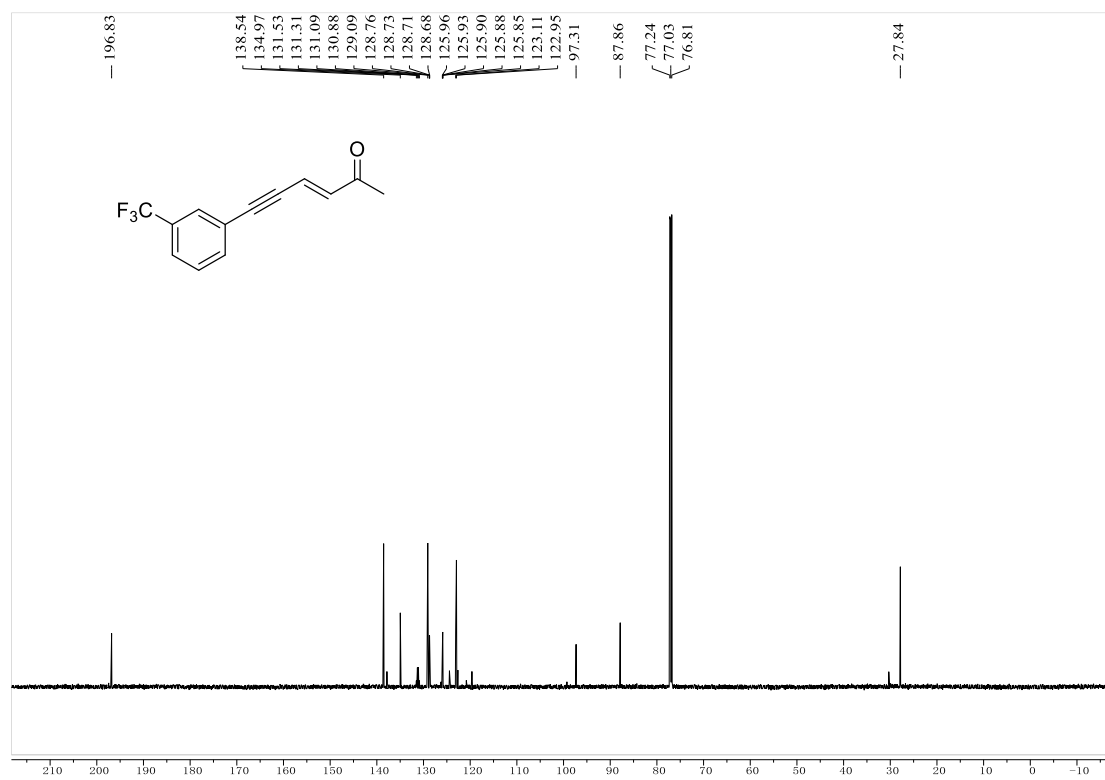

<sup>19</sup>F NMR spectra (376 MHz, CDCl<sub>3</sub>) of **1i**

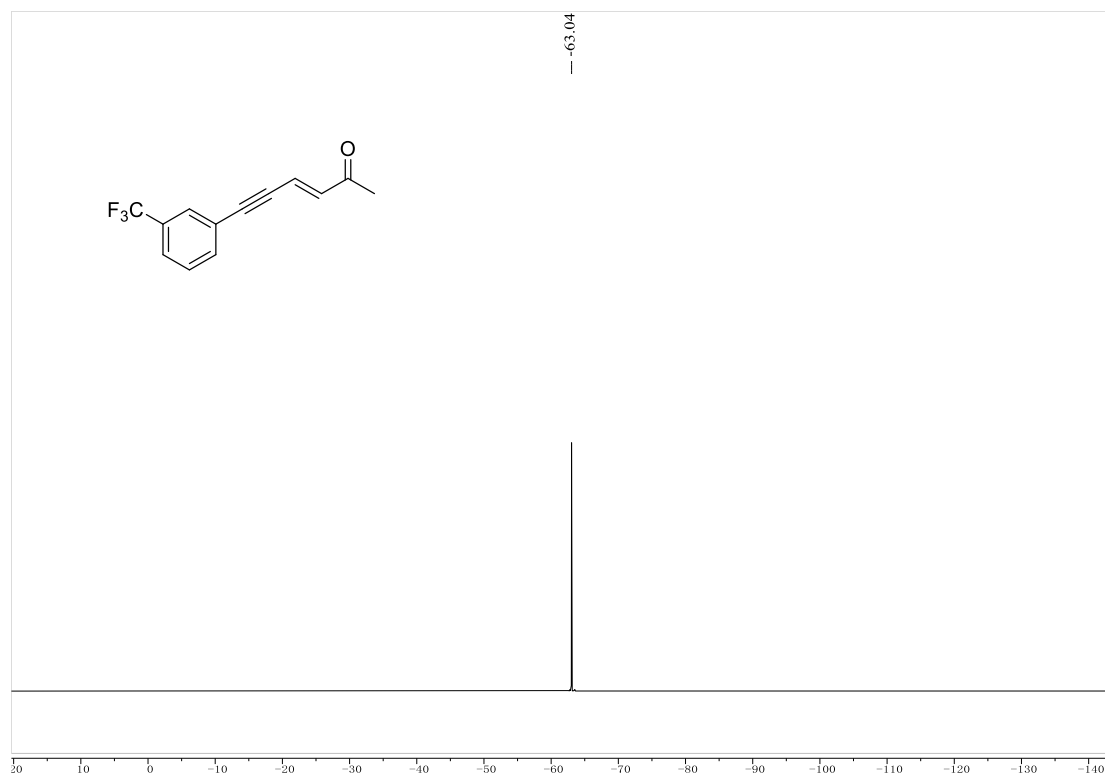

<sup>1</sup>H NMR spectra (600 MHz, CDCl<sub>3</sub>) of **1j**

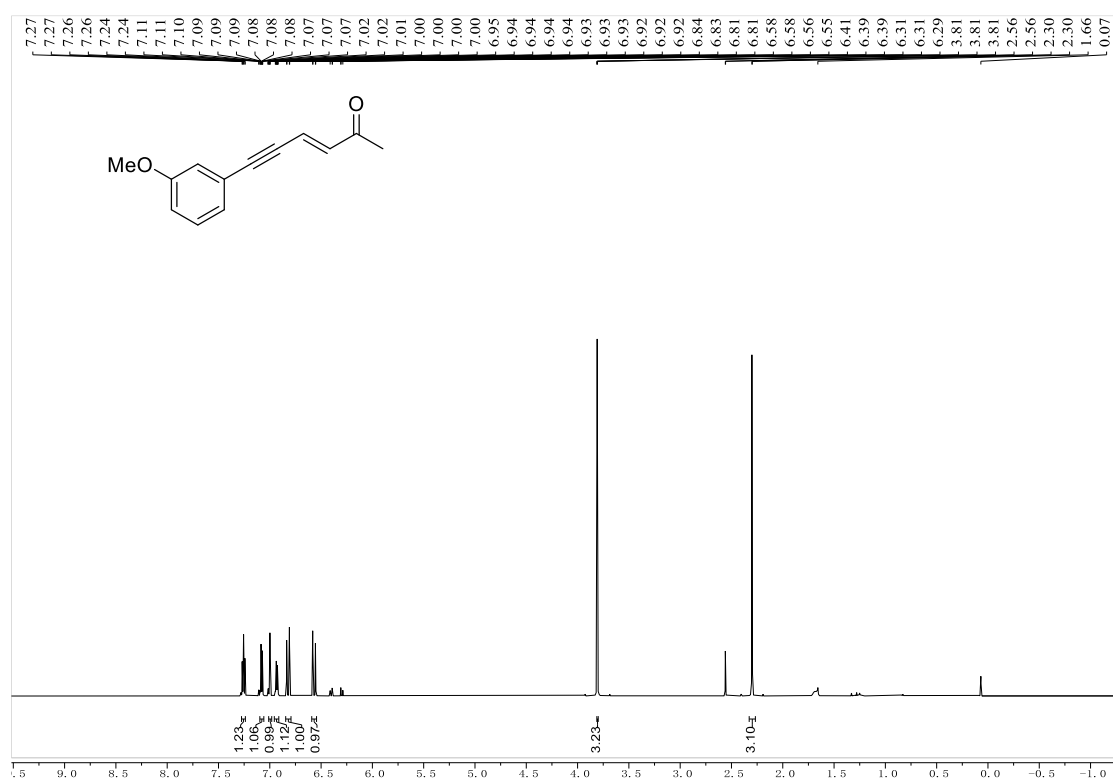

<sup>13</sup>C NMR spectra (151 MHz, CDCl<sub>3</sub>) of **1j**

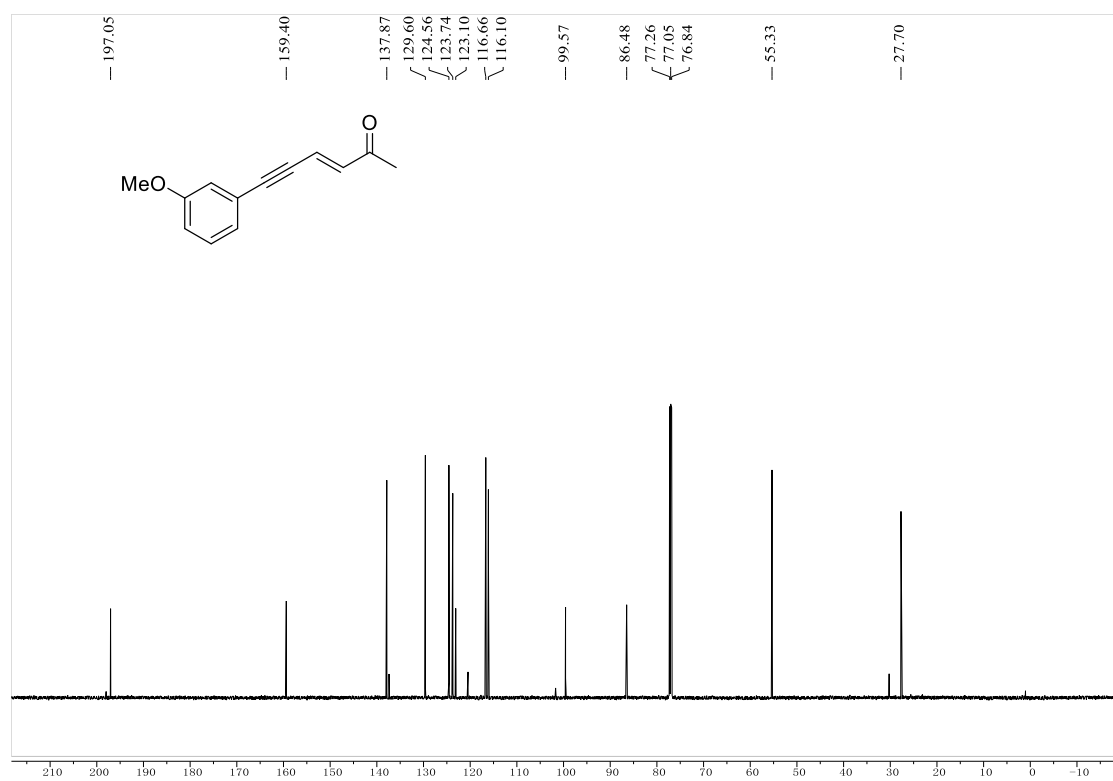

<sup>1</sup>H NMR spectra (600 MHz, CDCl<sub>3</sub>) of **1k**

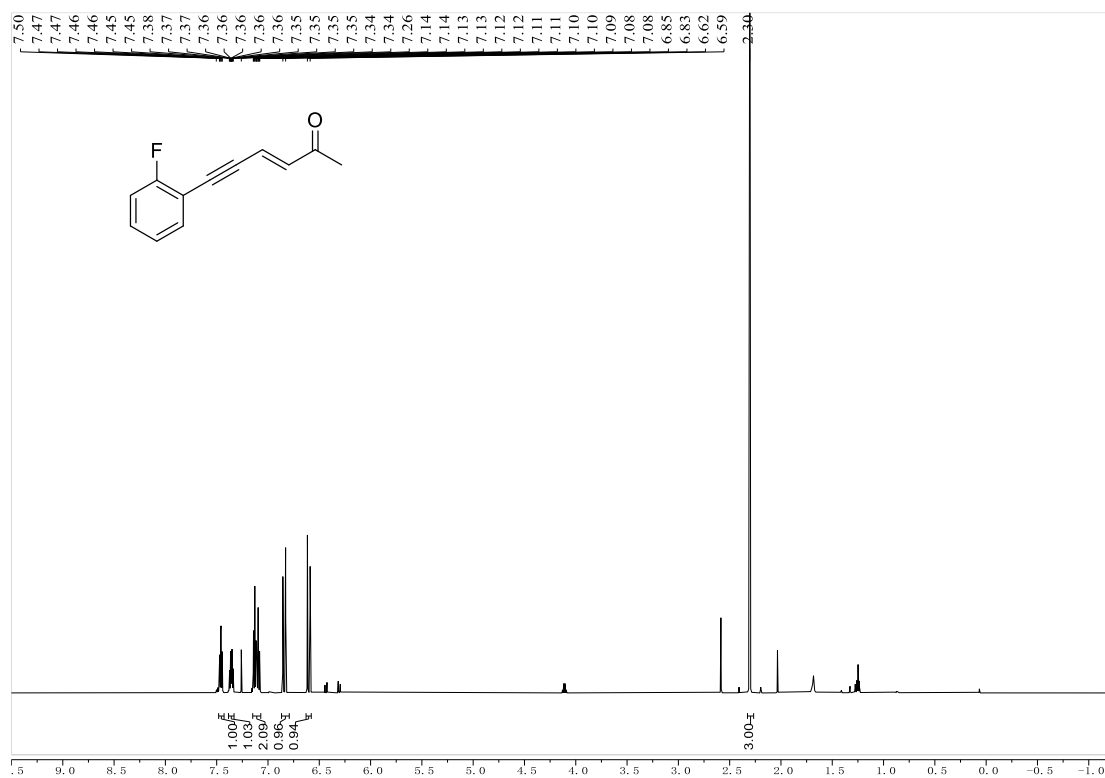

<sup>13</sup>C NMR spectra (151 MHz, CDCl<sub>3</sub>) of **1k**

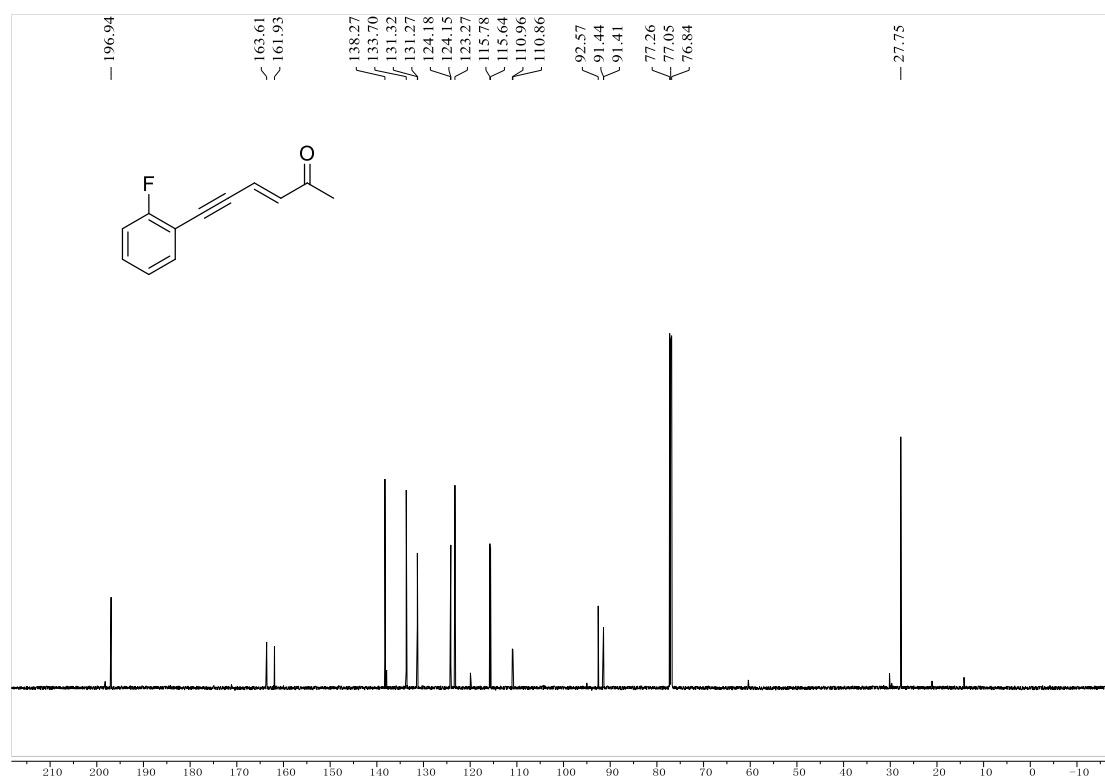

$^{19}\text{F}$  NMR spectra (376 MHz,  $\text{CDCl}_3$ ) of **1k**

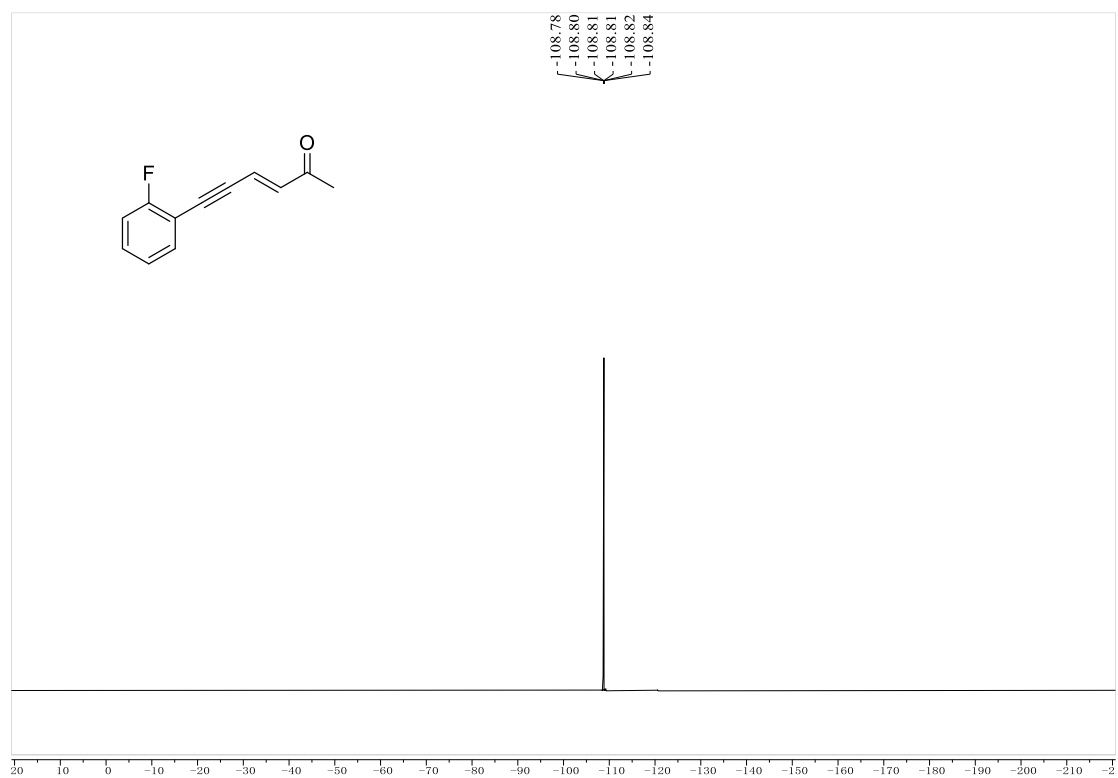

$^1\text{H}$  NMR spectra (600 MHz,  $\text{CDCl}_3$ ) of **1l**

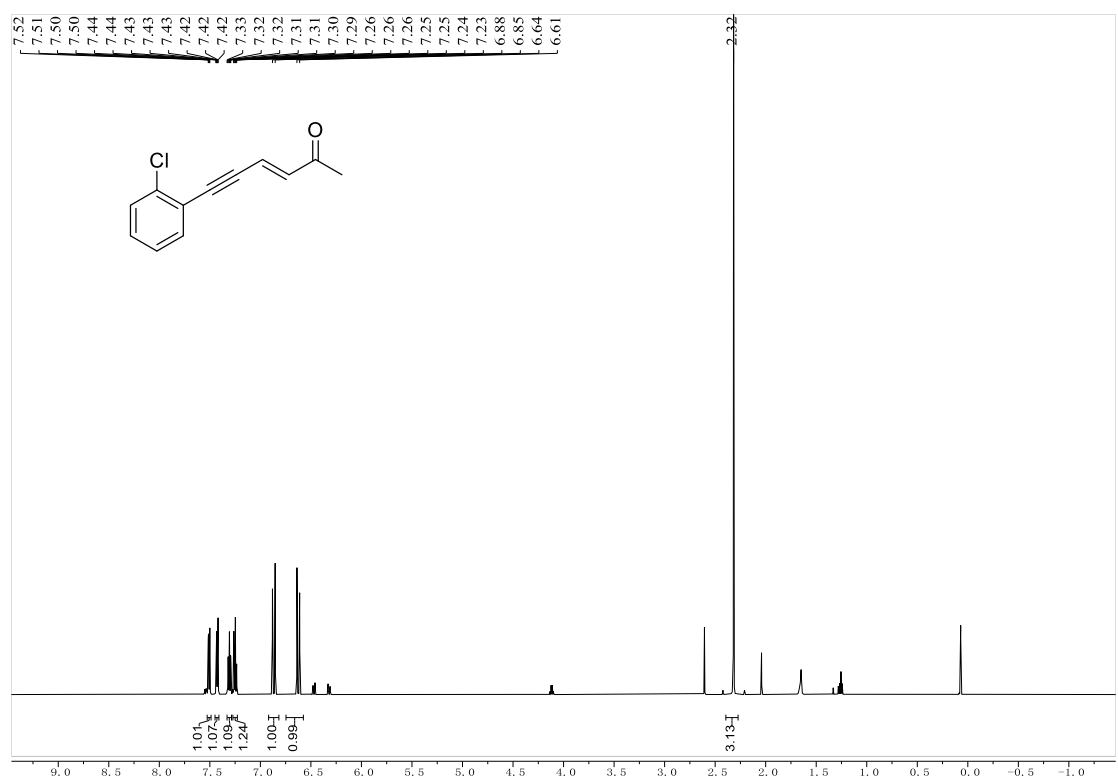

<sup>13</sup>C NMR spectra (151 MHz, CDCl<sub>3</sub>) of **1l**

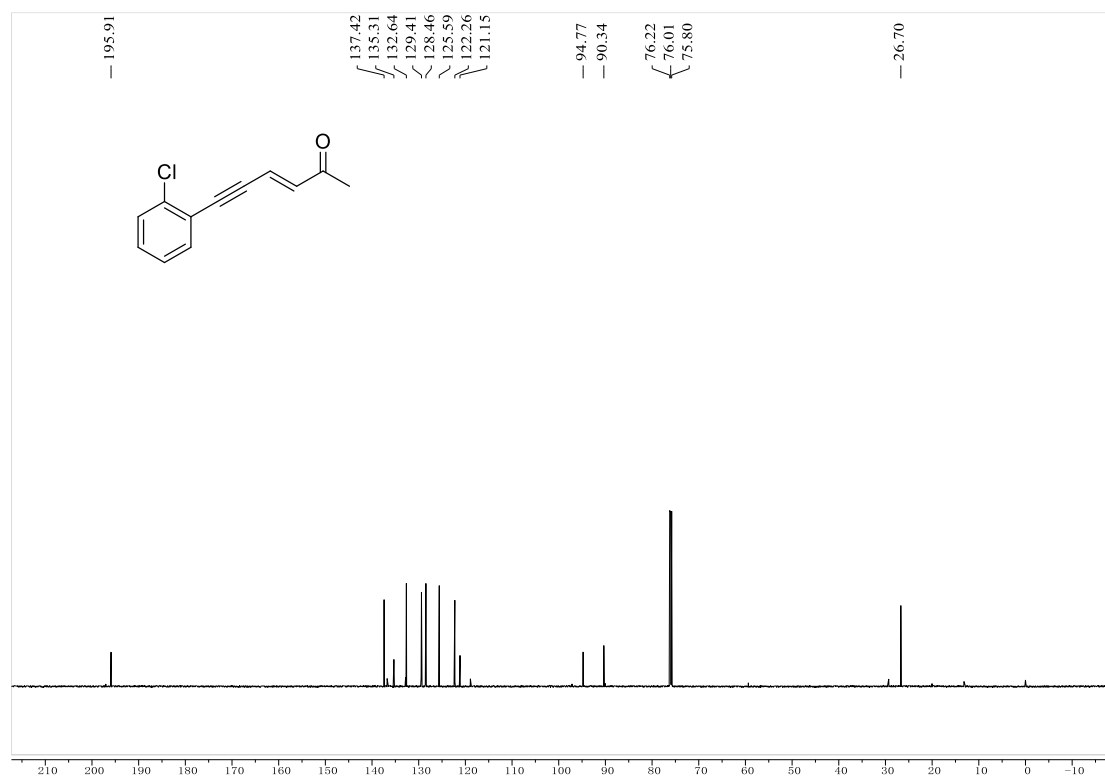

<sup>1</sup>H NMR spectra (600 MHz, CDCl<sub>3</sub>) of **1m**

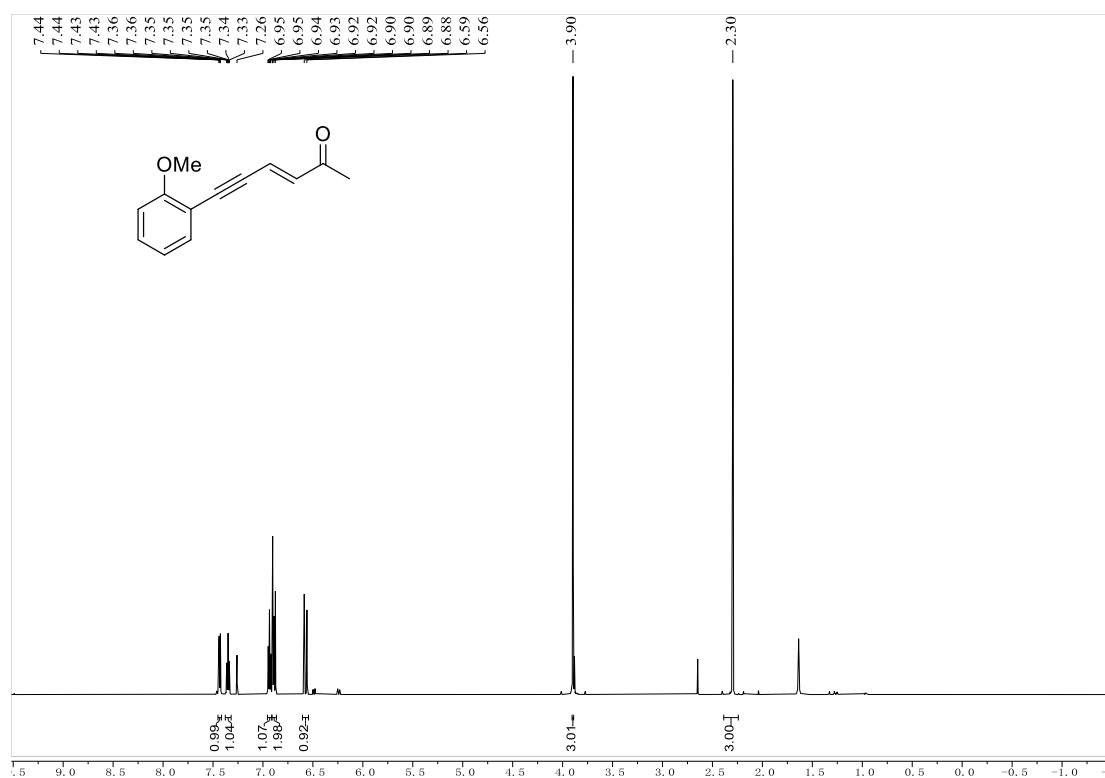

<sup>13</sup>C NMR spectra (151 MHz, CDCl<sub>3</sub>) of **1m**

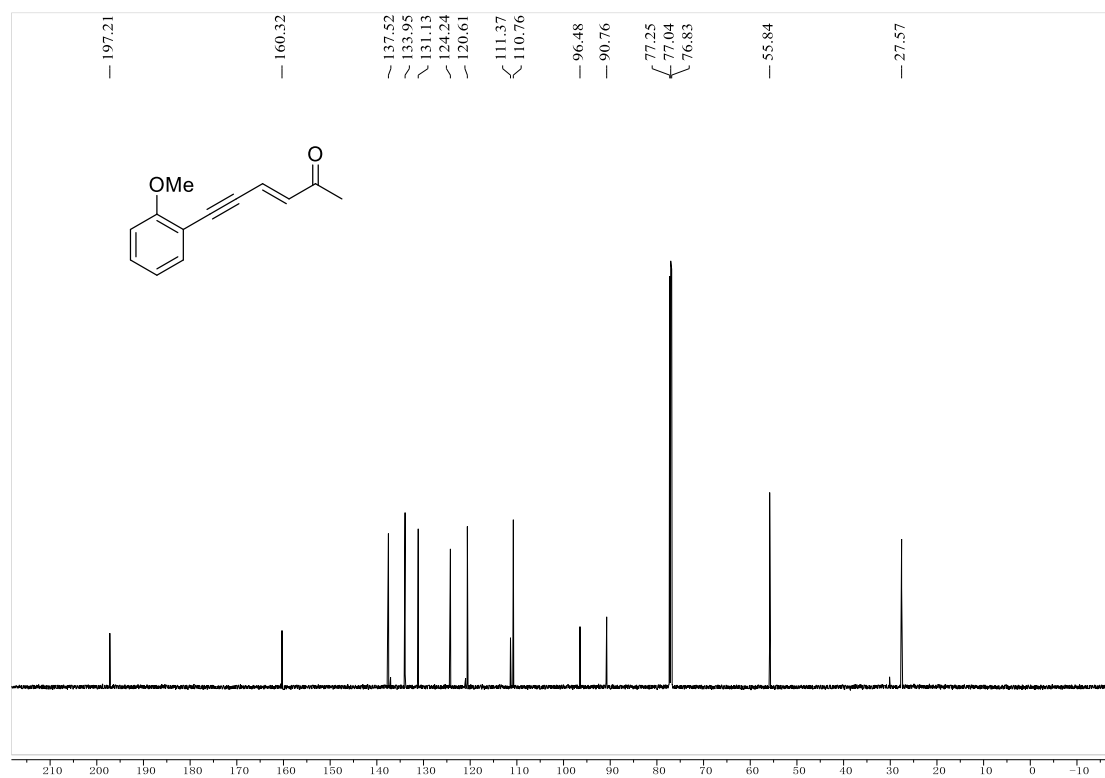

<sup>1</sup>H NMR spectra (600 MHz, CDCl<sub>3</sub>) of **1n**

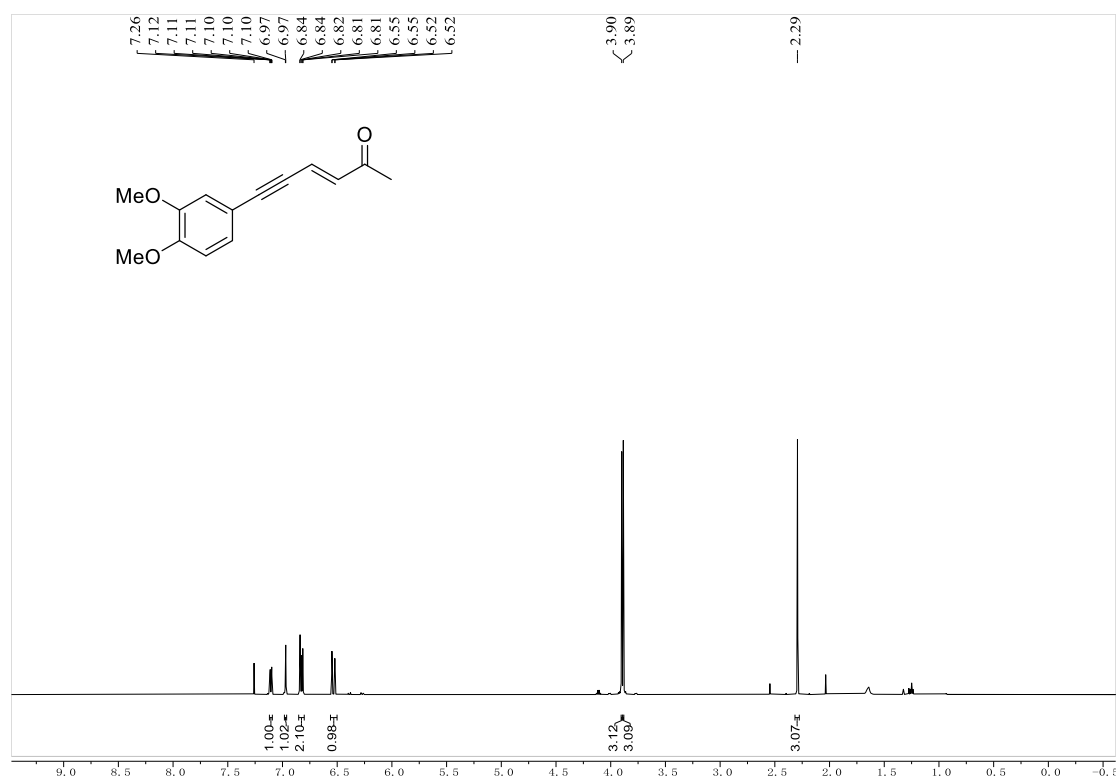

$^{13}\text{C}$  NMR spectra (151 MHz,  $\text{CDCl}_3$ ) of **1n**

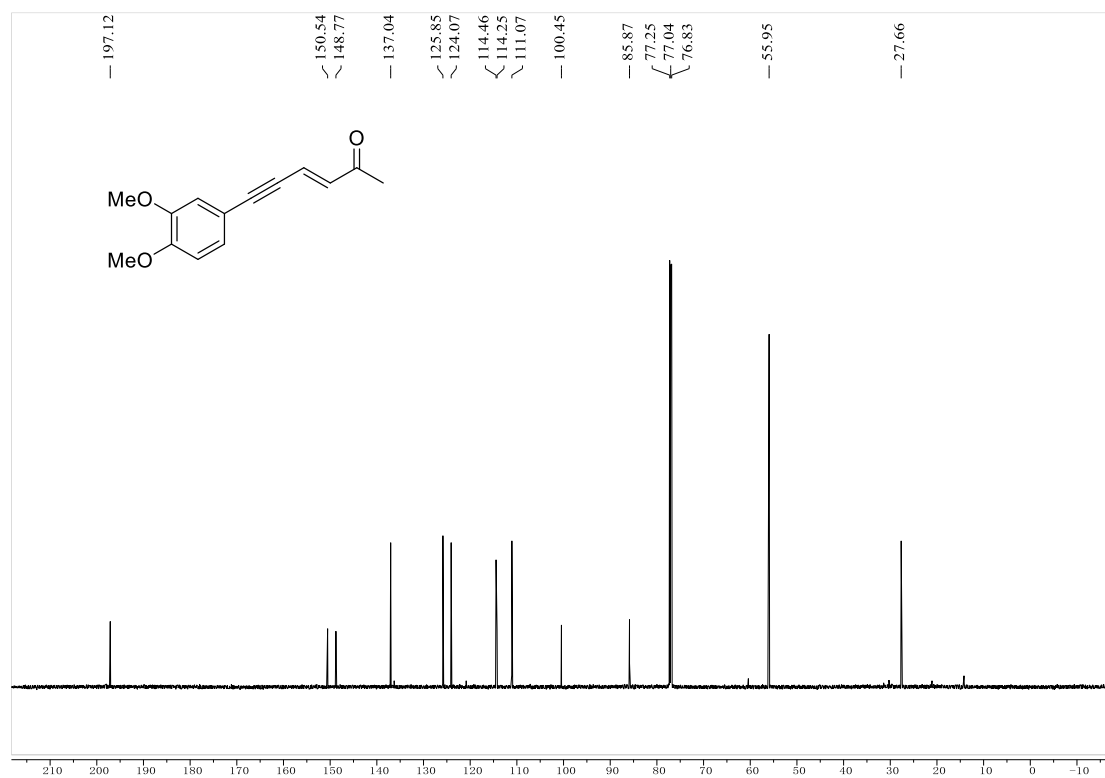

$^1\text{H}$  NMR spectra (600 MHz,  $\text{CDCl}_3$ ) of **1o**

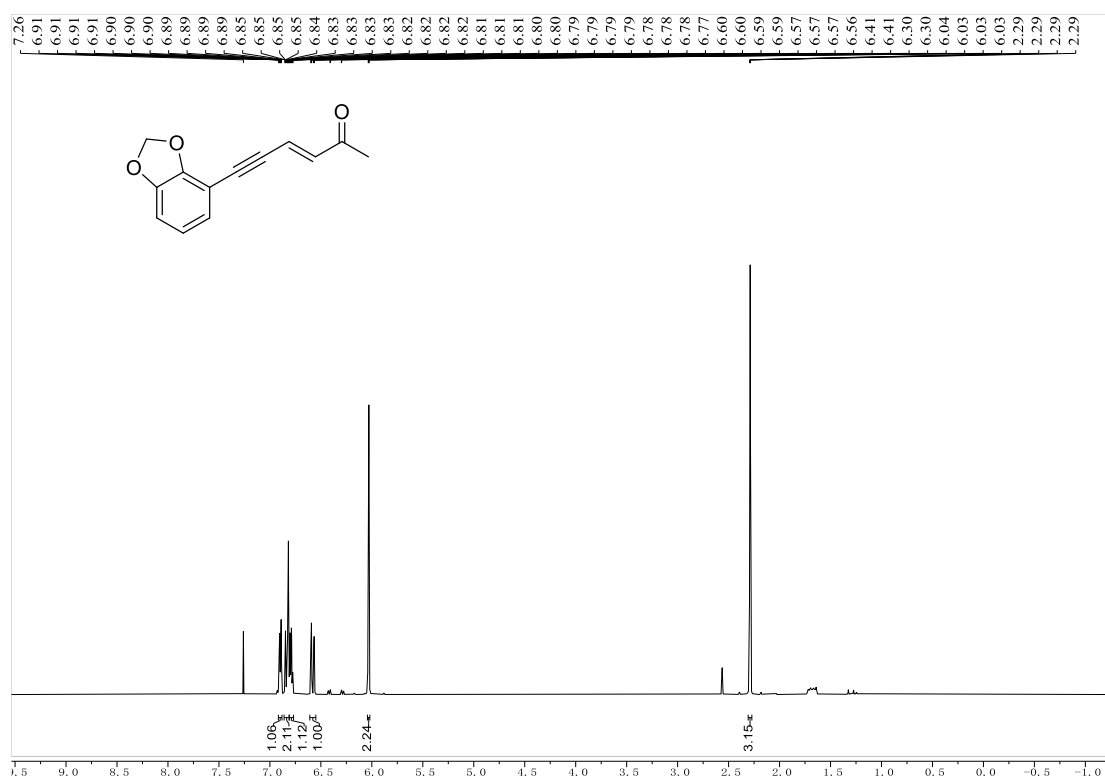



<sup>13</sup>C NMR spectra (151 MHz, CDCl<sub>3</sub>) of **1o**

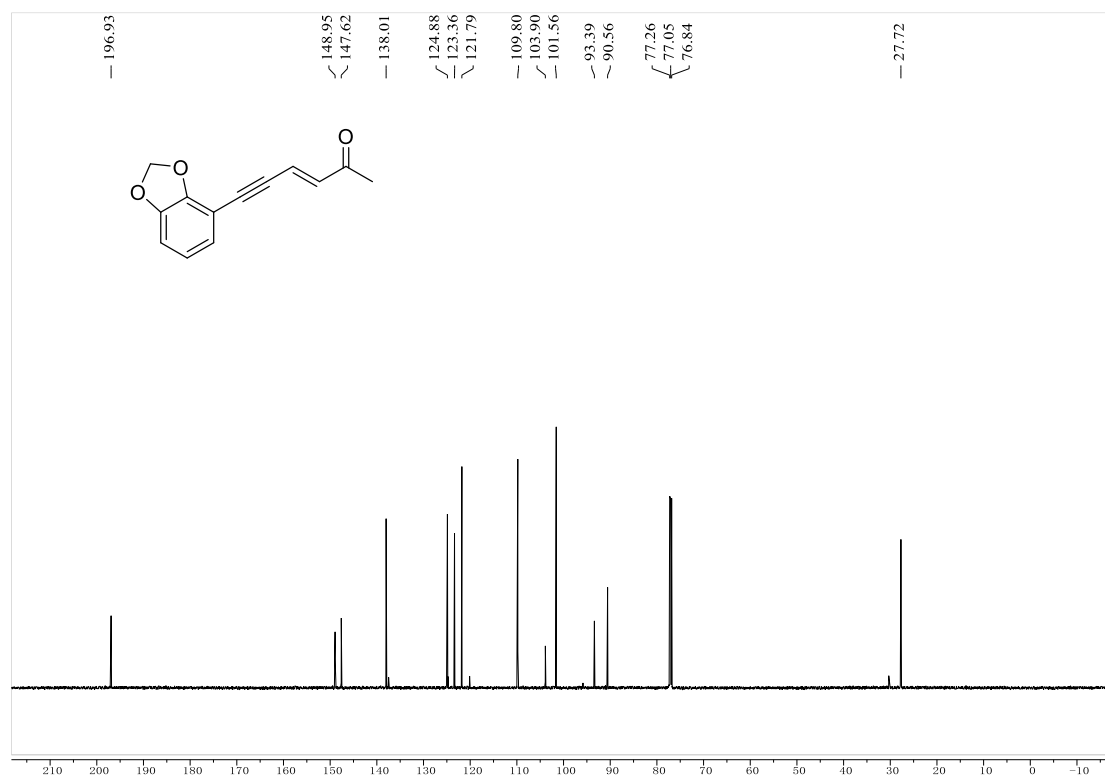

<sup>1</sup>H NMR spectra (600 MHz, CDCl<sub>3</sub>) of **1p**

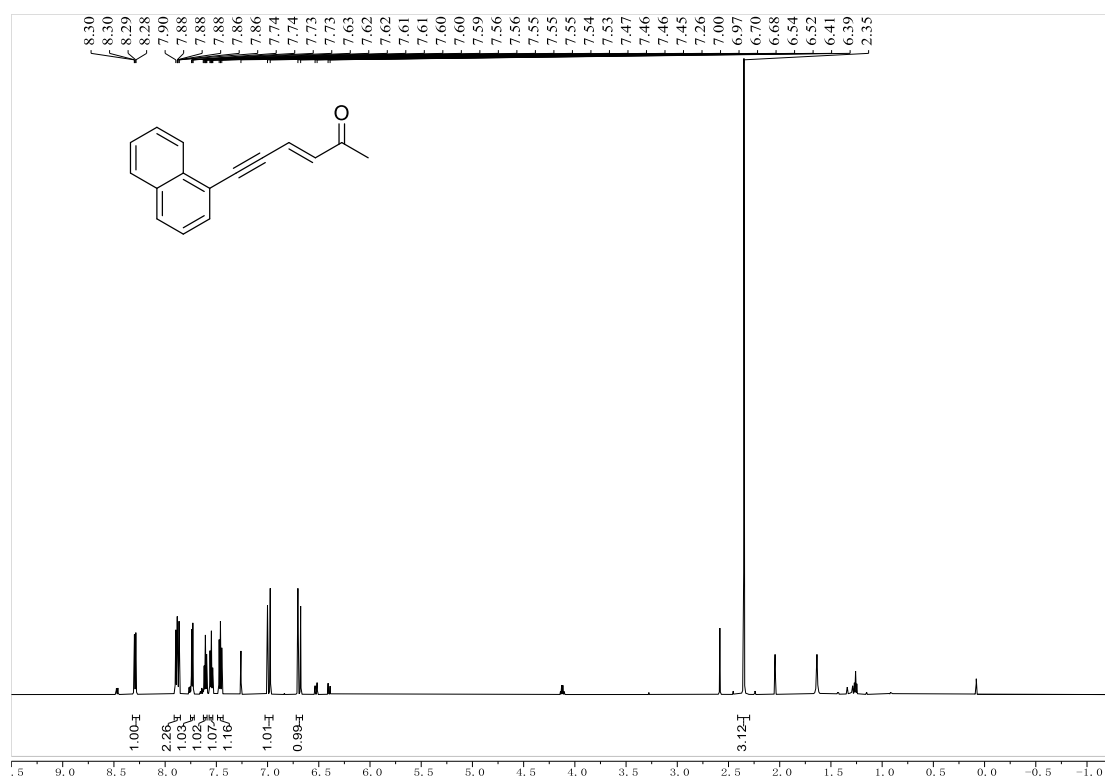

<sup>13</sup>C NMR spectra (151 MHz, CDCl<sub>3</sub>) of **1p**

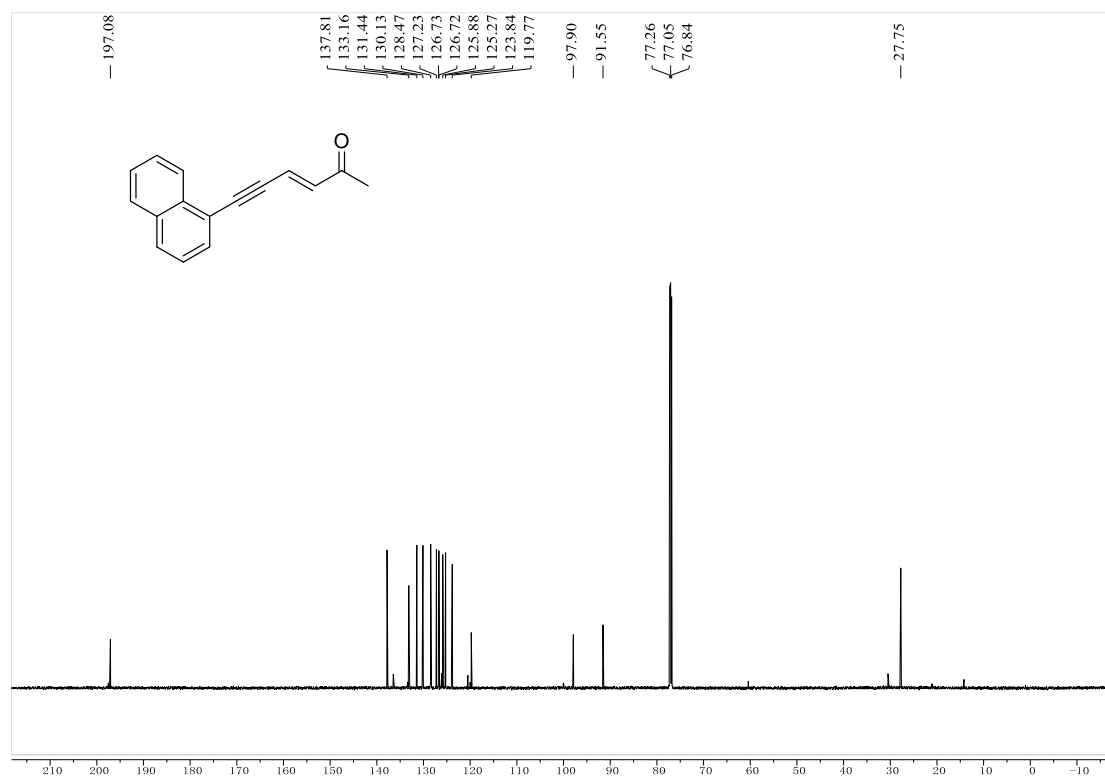

<sup>1</sup>H NMR spectra (600 MHz, CDCl<sub>3</sub>) of **1q**

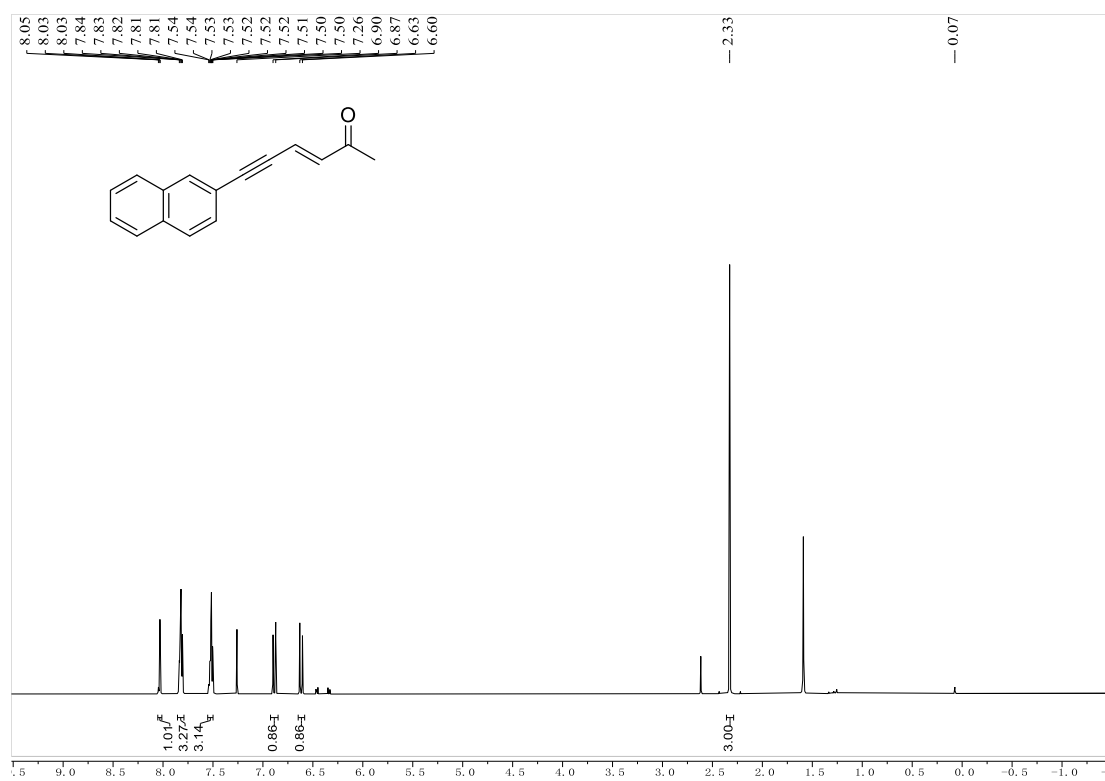

<sup>13</sup>C NMR spectra (151 MHz, CDCl<sub>3</sub>) of **1q**

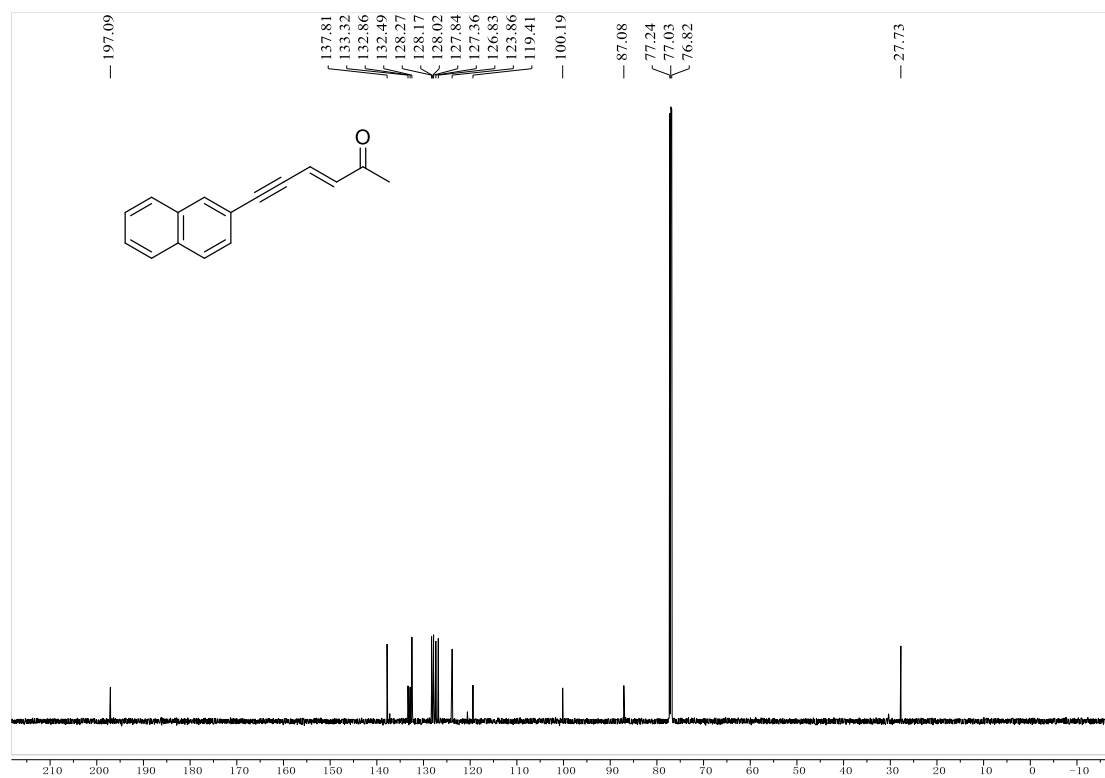

<sup>1</sup>H NMR spectra (600 MHz, CDCl<sub>3</sub>) of **1r**

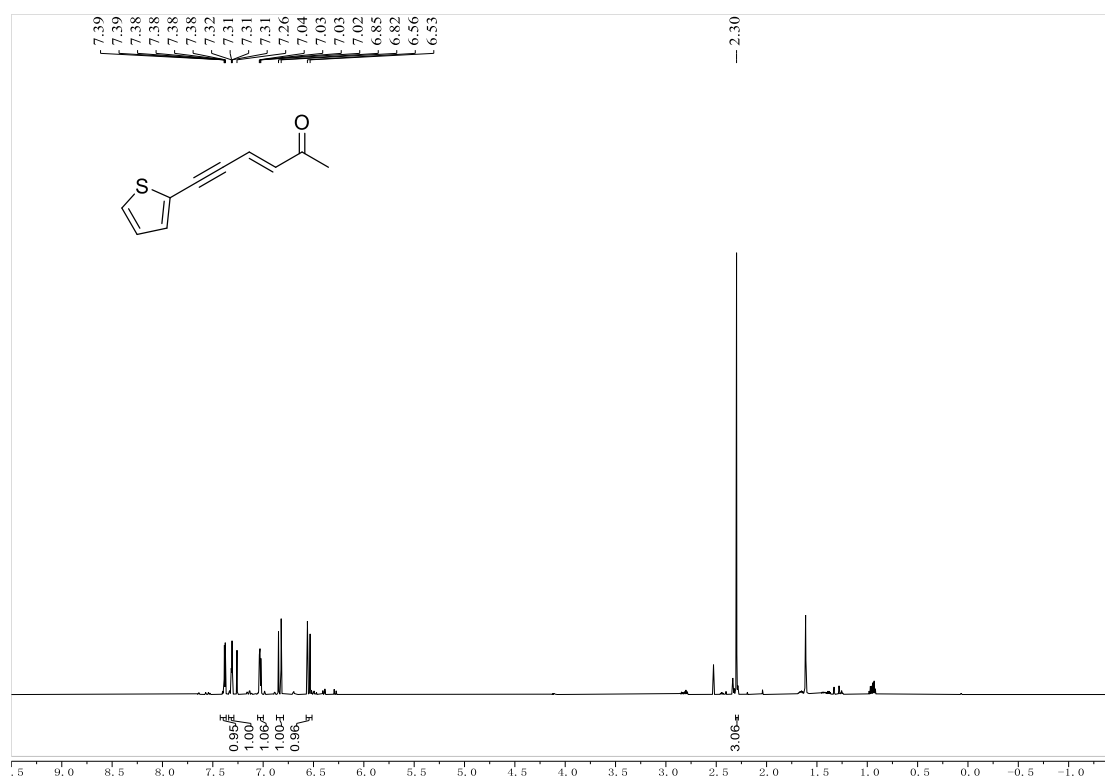

<sup>13</sup>C NMR spectra (151 MHz, CDCl<sub>3</sub>) of **1r**

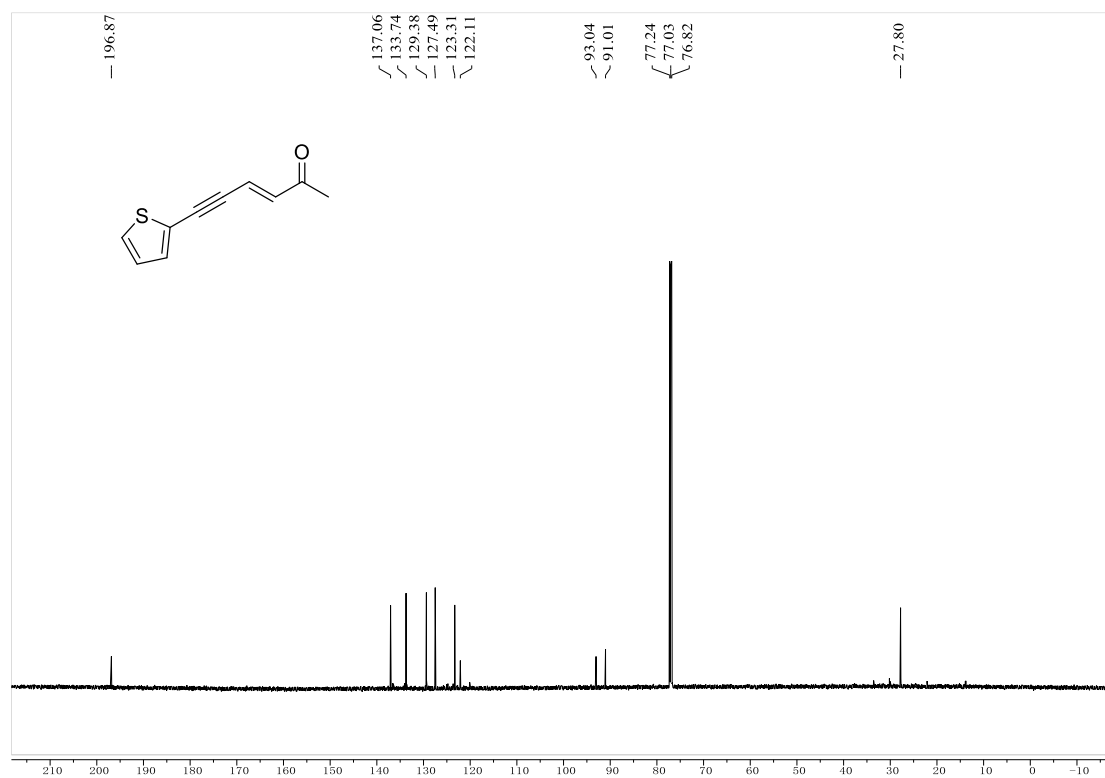

<sup>1</sup>H NMR spectra (600 MHz, CDCl<sub>3</sub>) of **1s**

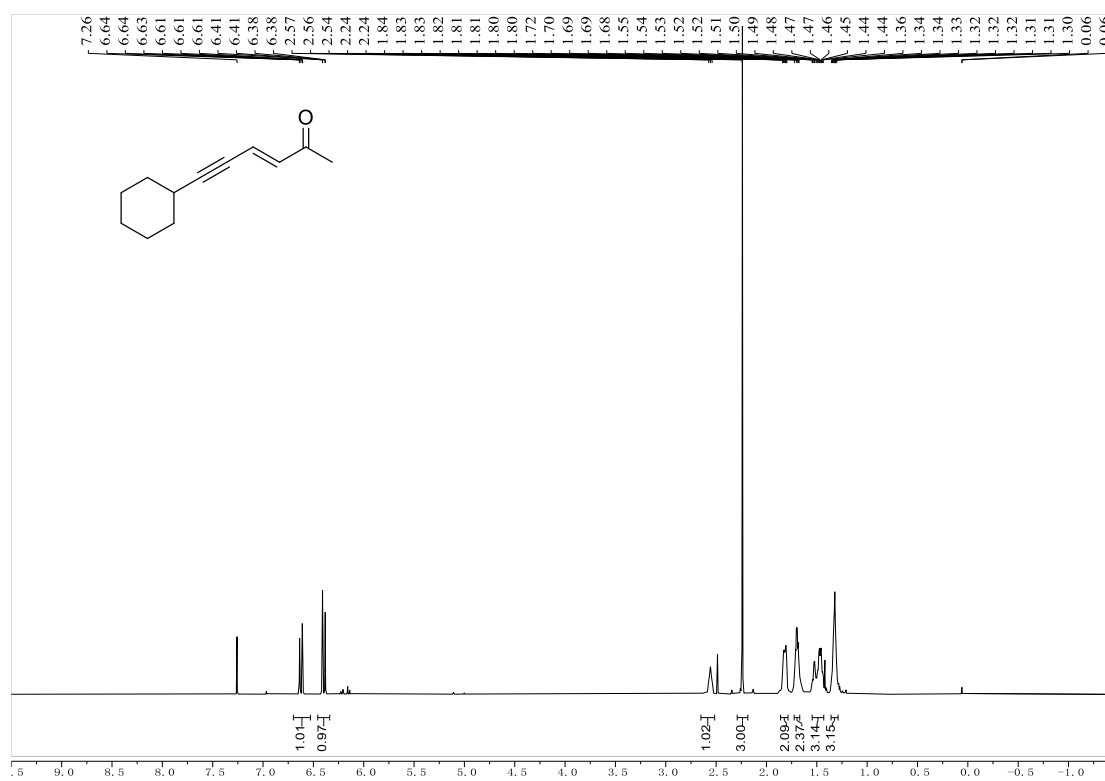

$^{13}\text{C}$  NMR spectra (151 MHz,  $\text{CDCl}_3$ ) of **1s**

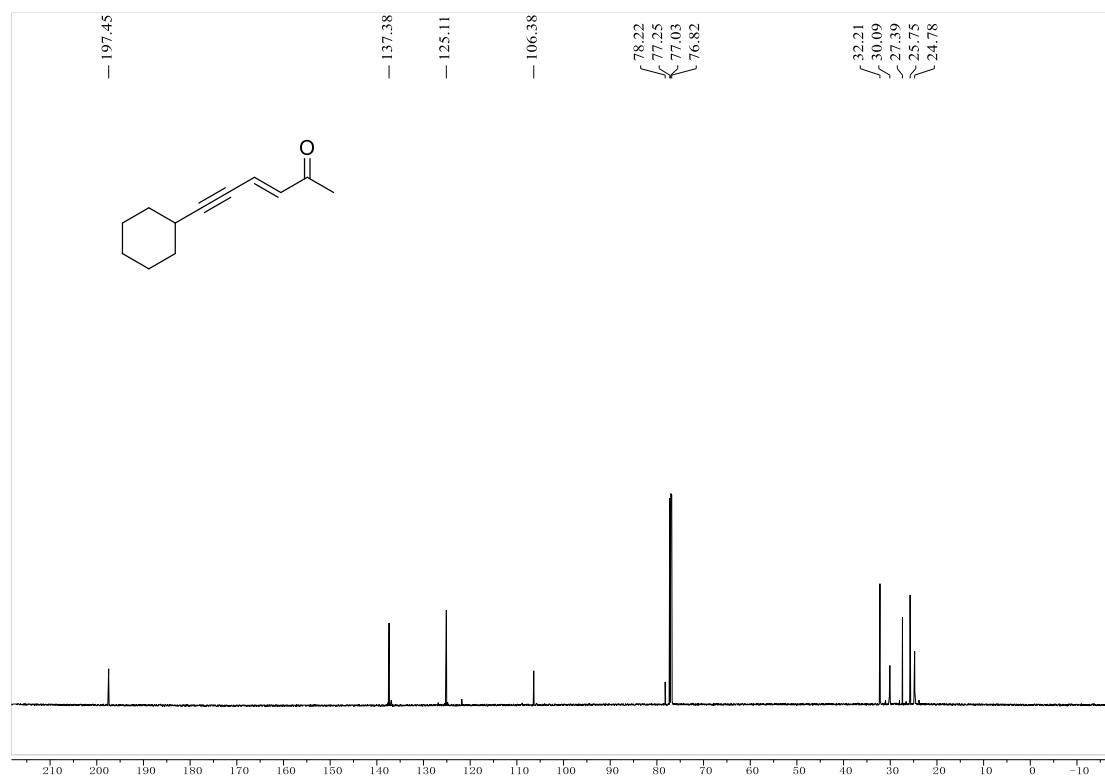

$^1\text{H}$  NMR spectra (600 MHz,  $\text{CDCl}_3$ ) of **1t**

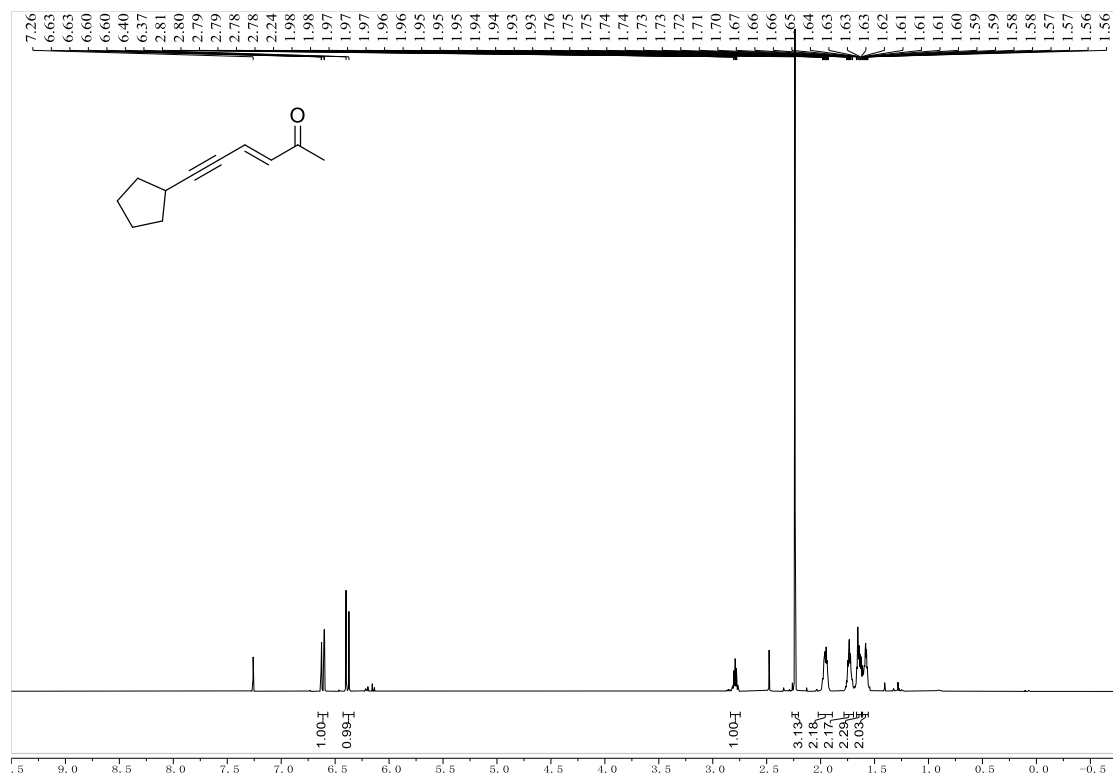

<sup>13</sup>C NMR spectra (151 MHz, CDCl<sub>3</sub>) of **1t**

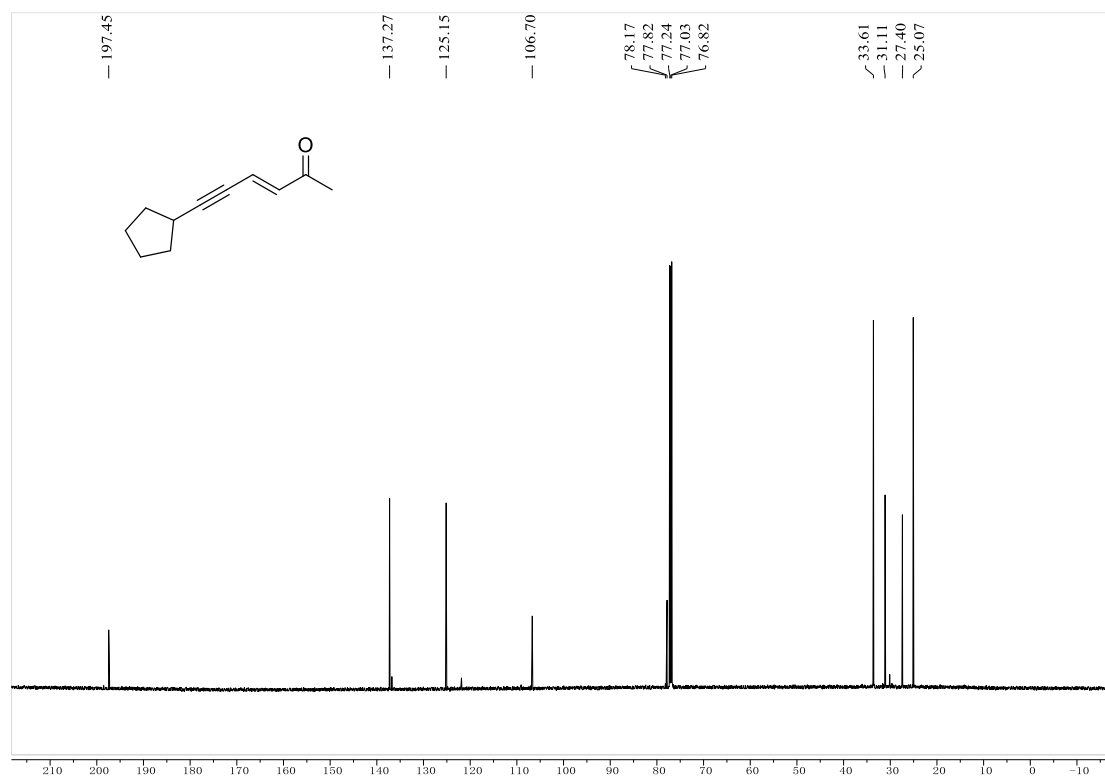

<sup>1</sup>H NMR spectra (600 MHz, CDCl<sub>3</sub>) of **1u**

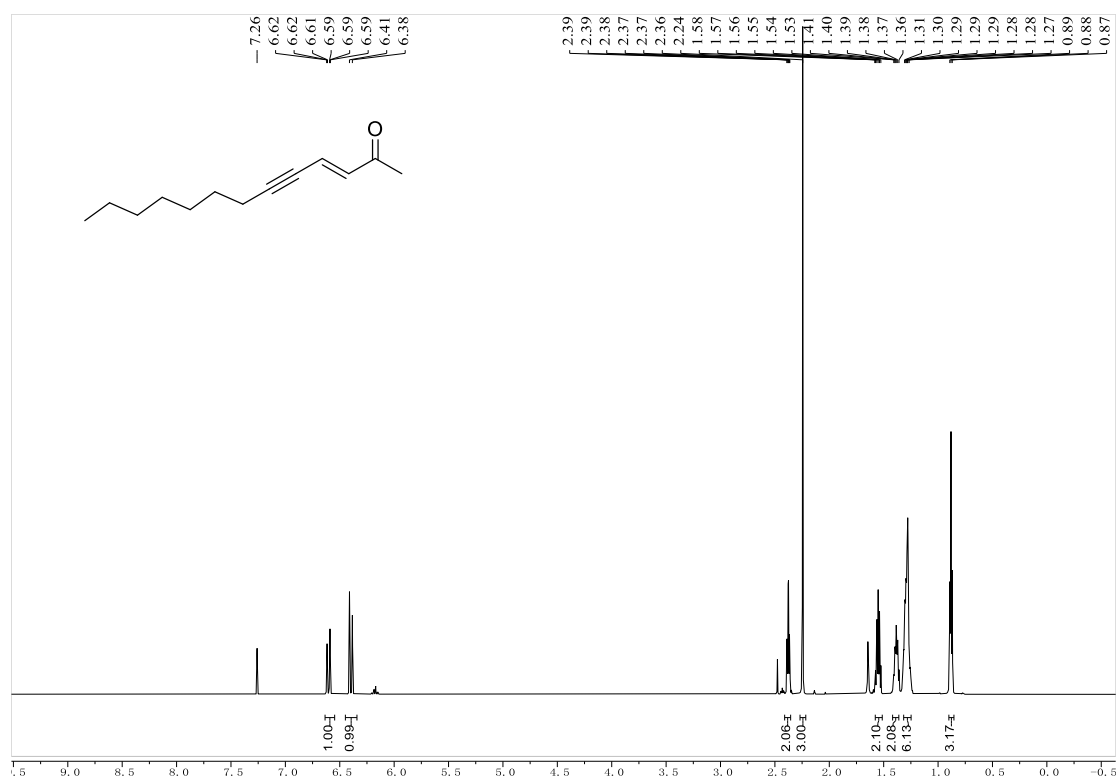

$^{13}\text{C}$  NMR spectra (151 MHz,  $\text{CDCl}_3$ ) of **1u**

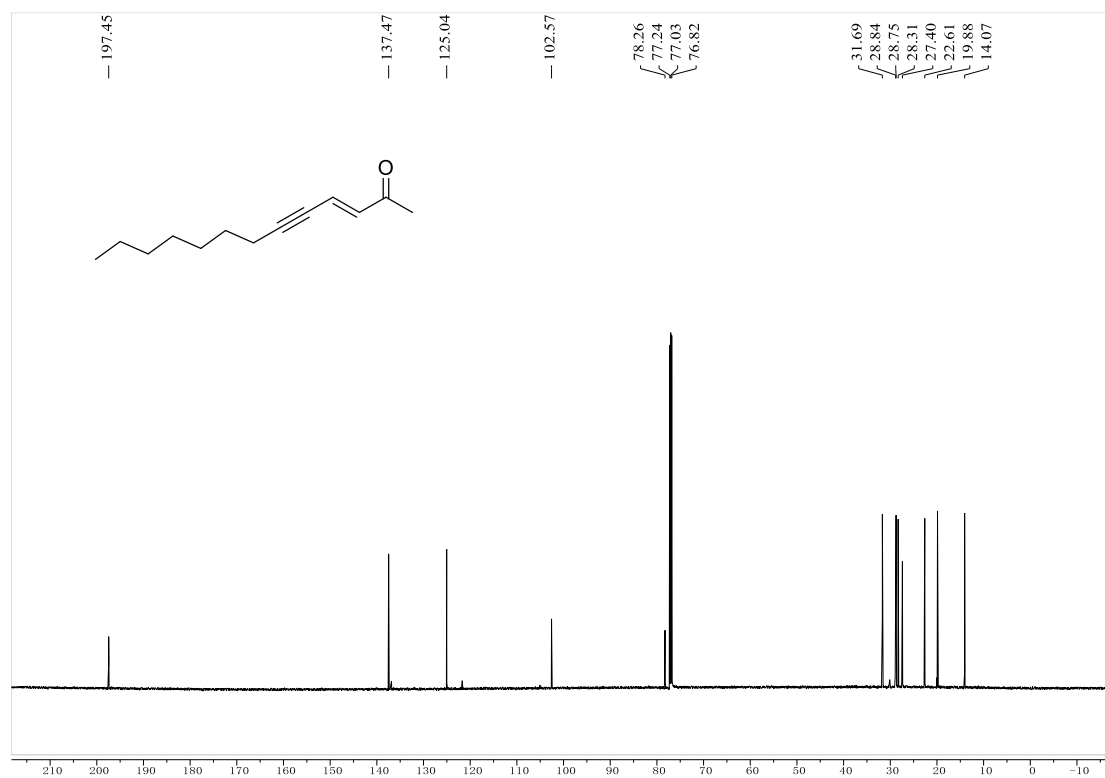

$^1\text{H}$  NMR spectra (600 MHz,  $\text{CDCl}_3$ ) of **1v**

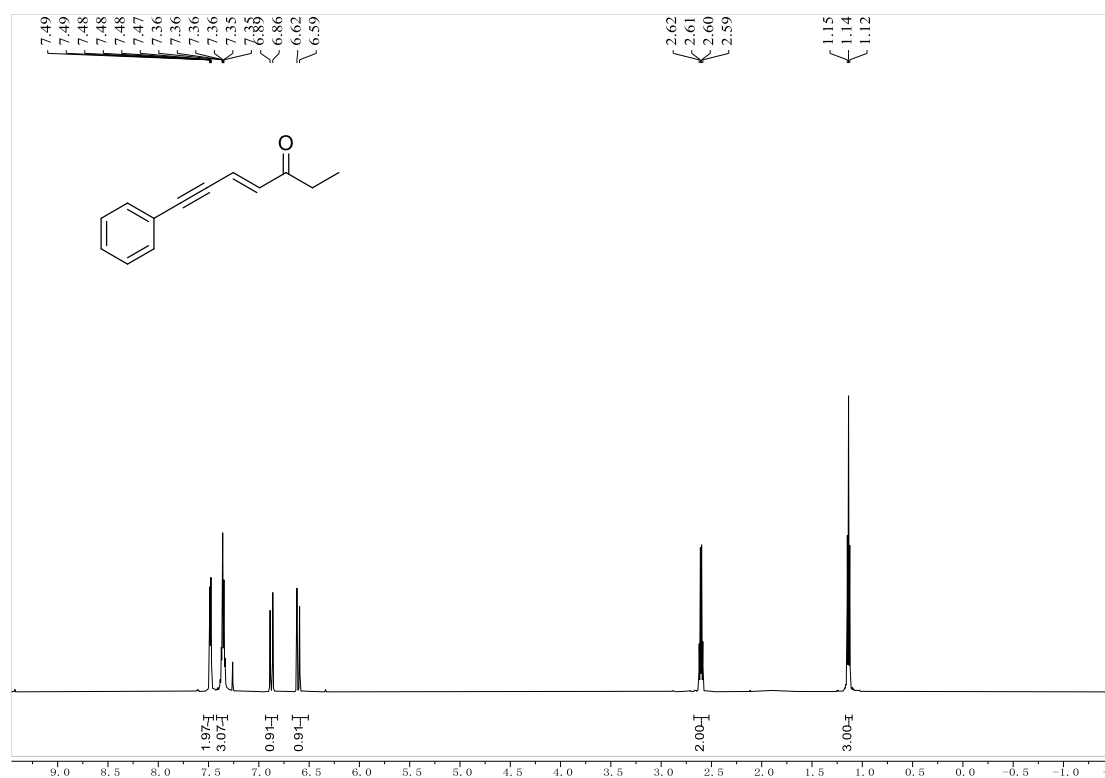

<sup>13</sup>C NMR spectra (151 MHz, CDCl<sub>3</sub>) of **1v**

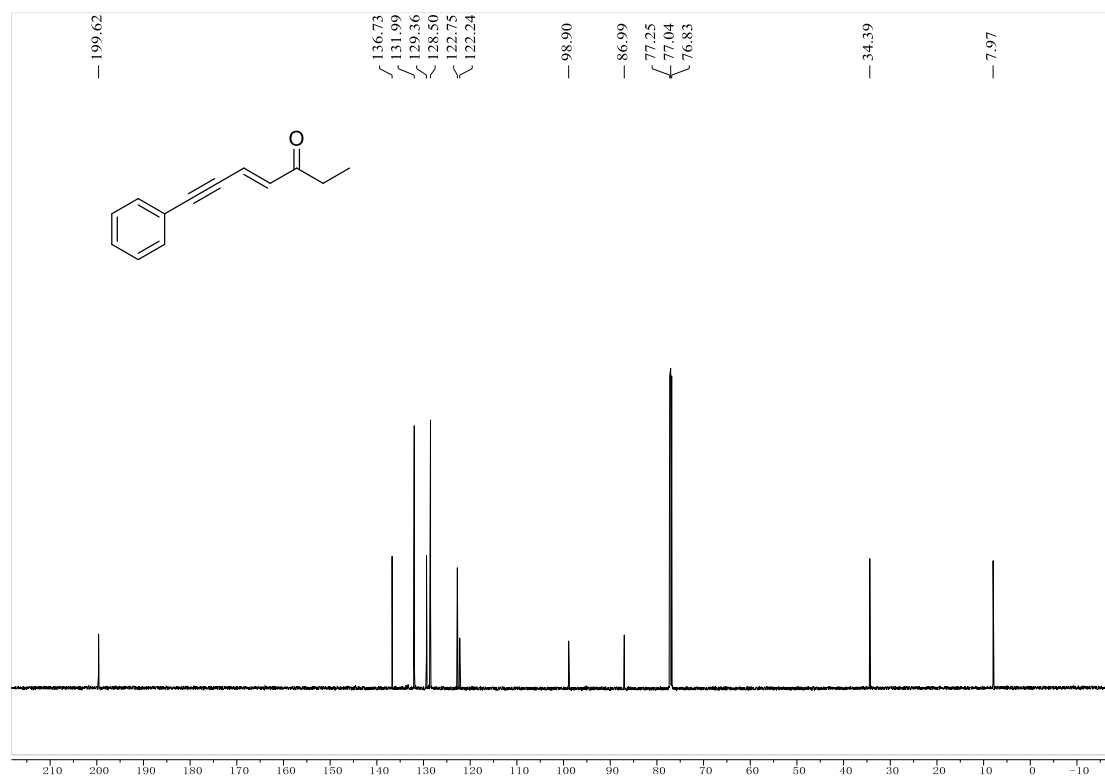

<sup>1</sup>H NMR spectra (400 MHz, CDCl<sub>3</sub>) of **1w**

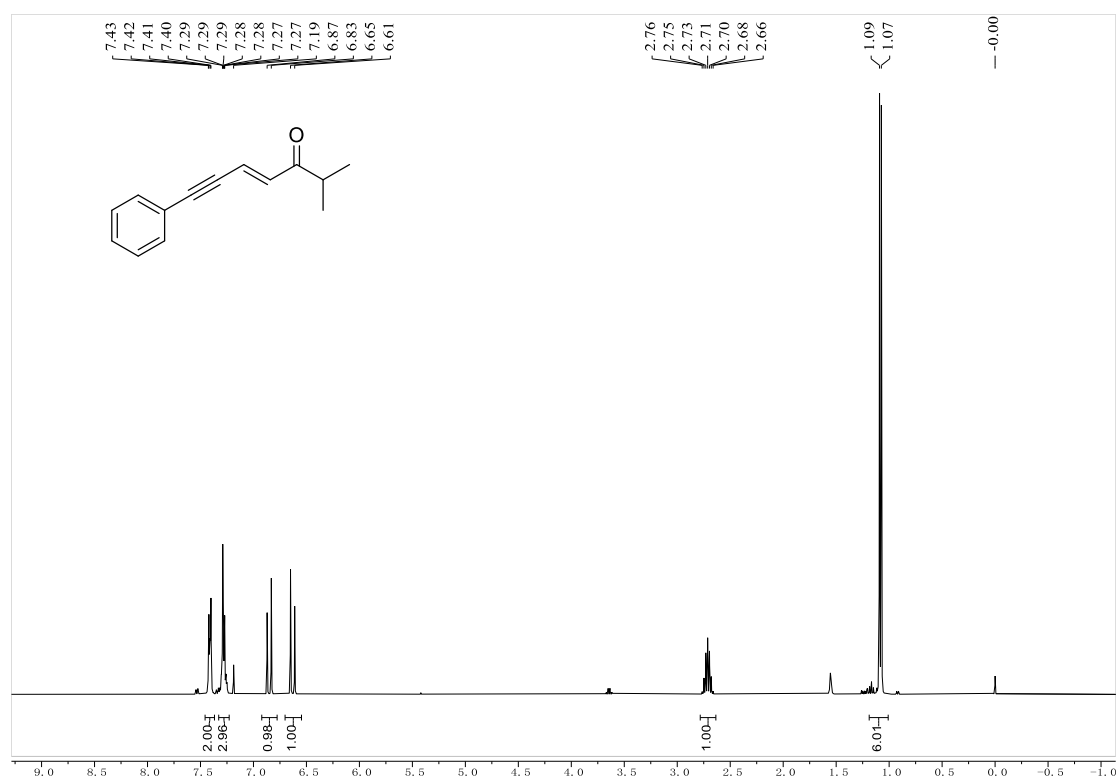



<sup>13</sup>C NMR spectra (101 MHz, CDCl<sub>3</sub>) of **1w**

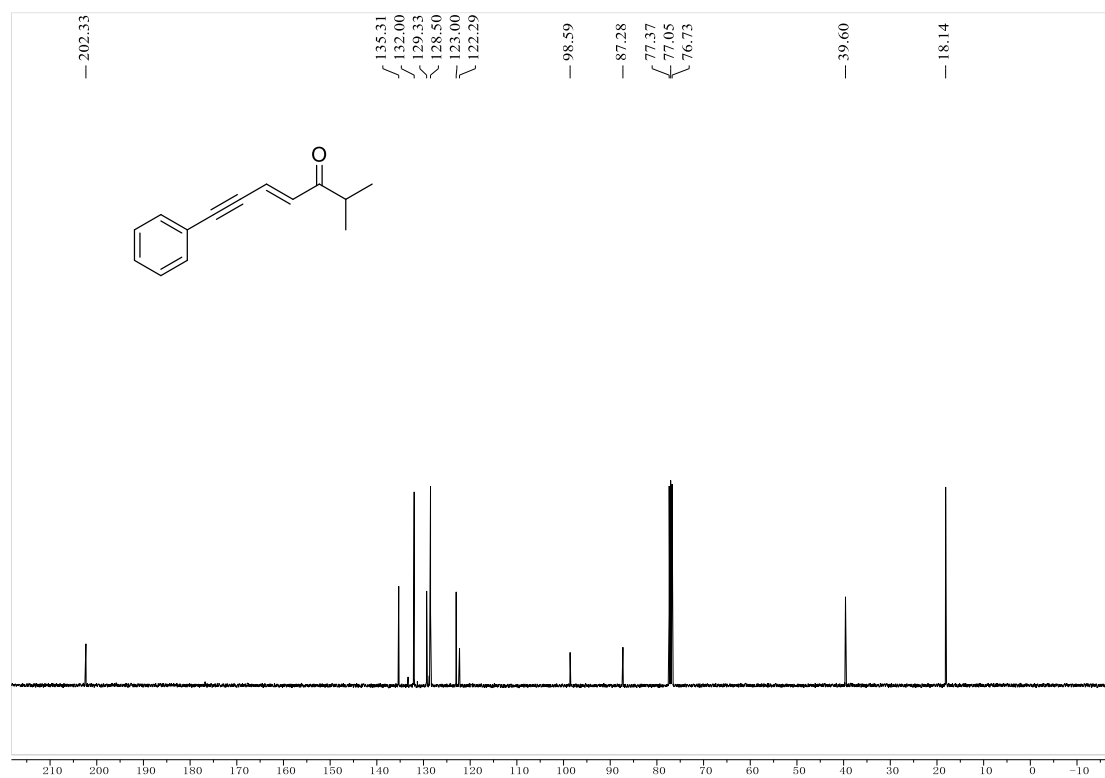

<sup>1</sup>H NMR spectra (600 MHz, CDCl<sub>3</sub>) of **1x**

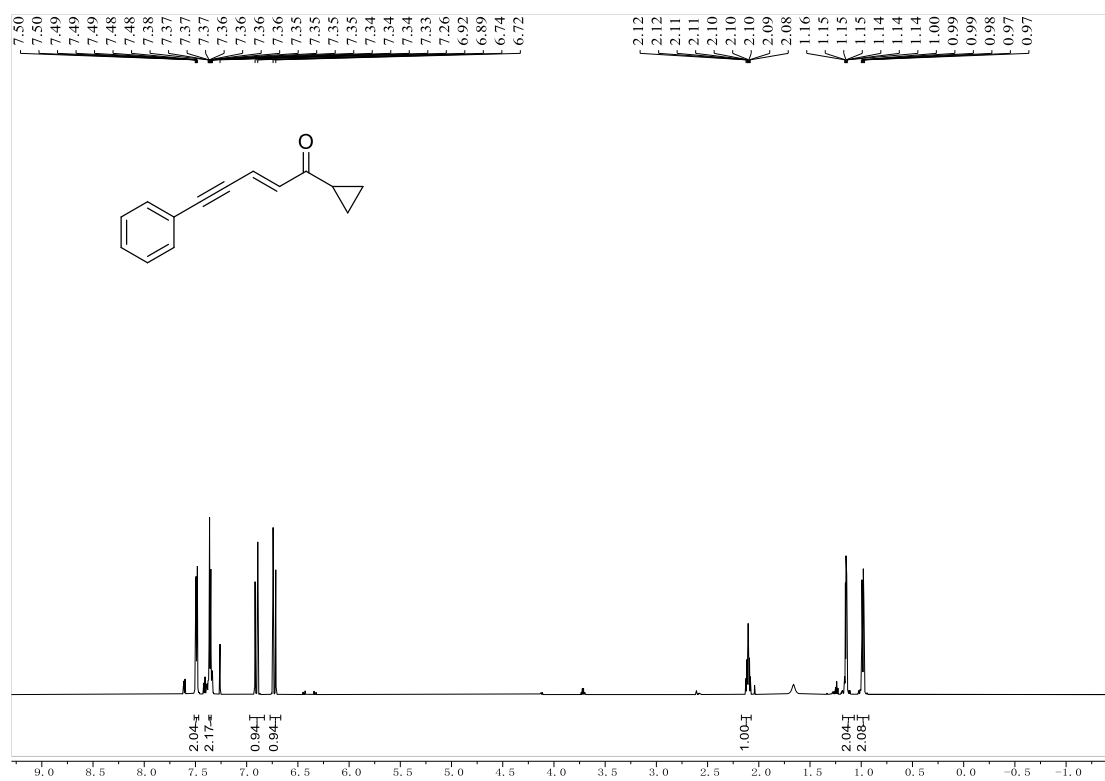

$^{13}\text{C}$  NMR spectra (151 MHz,  $\text{CDCl}_3$ ) of **1x**

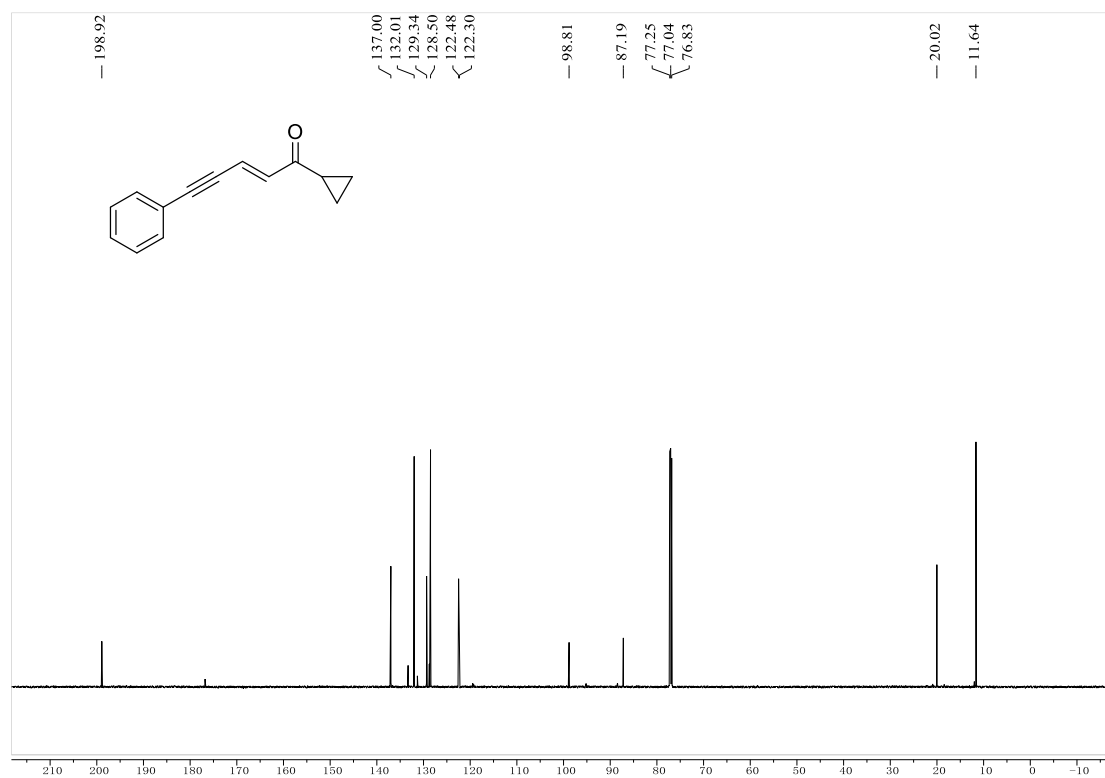

$^1\text{H}$  NMR (600 MHz,  $\text{CDCl}_3$ ) of **1y**

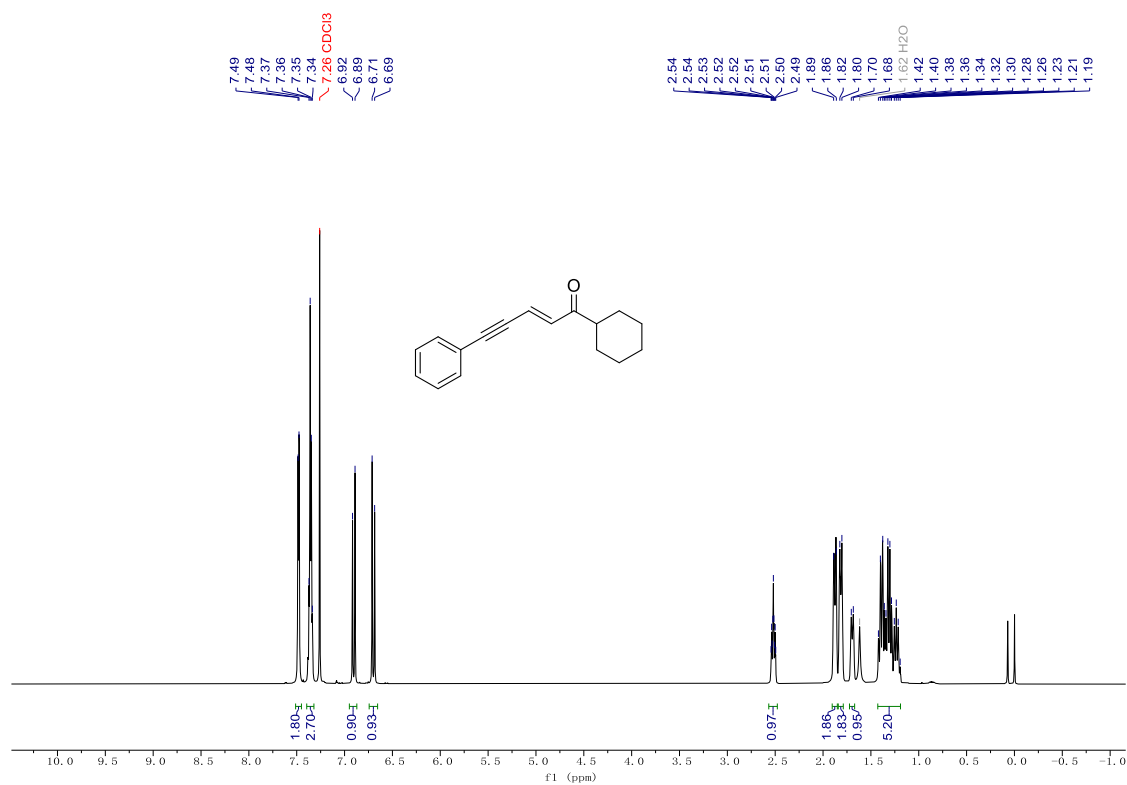

$^{13}\text{C}$  NMR (151 MHz,  $\text{CDCl}_3$ ) of **1y**

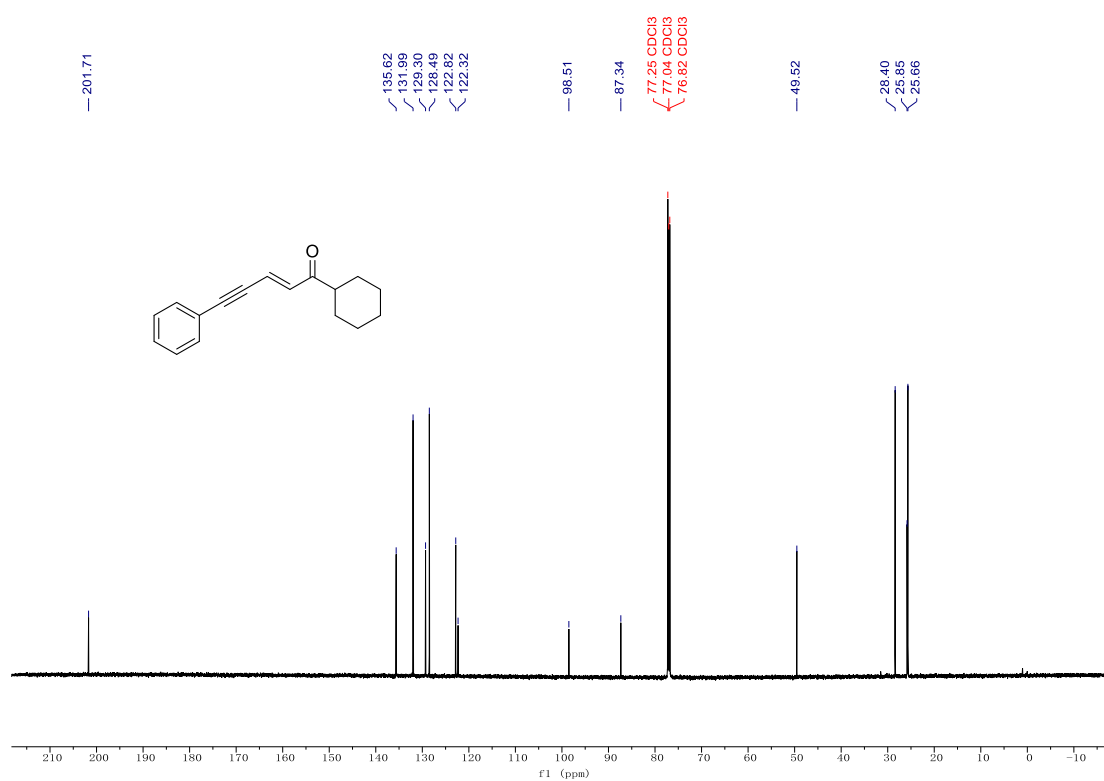

$^1\text{H}$  NMR spectra (600 MHz,  $\text{CDCl}_3$ ) of **1aa**

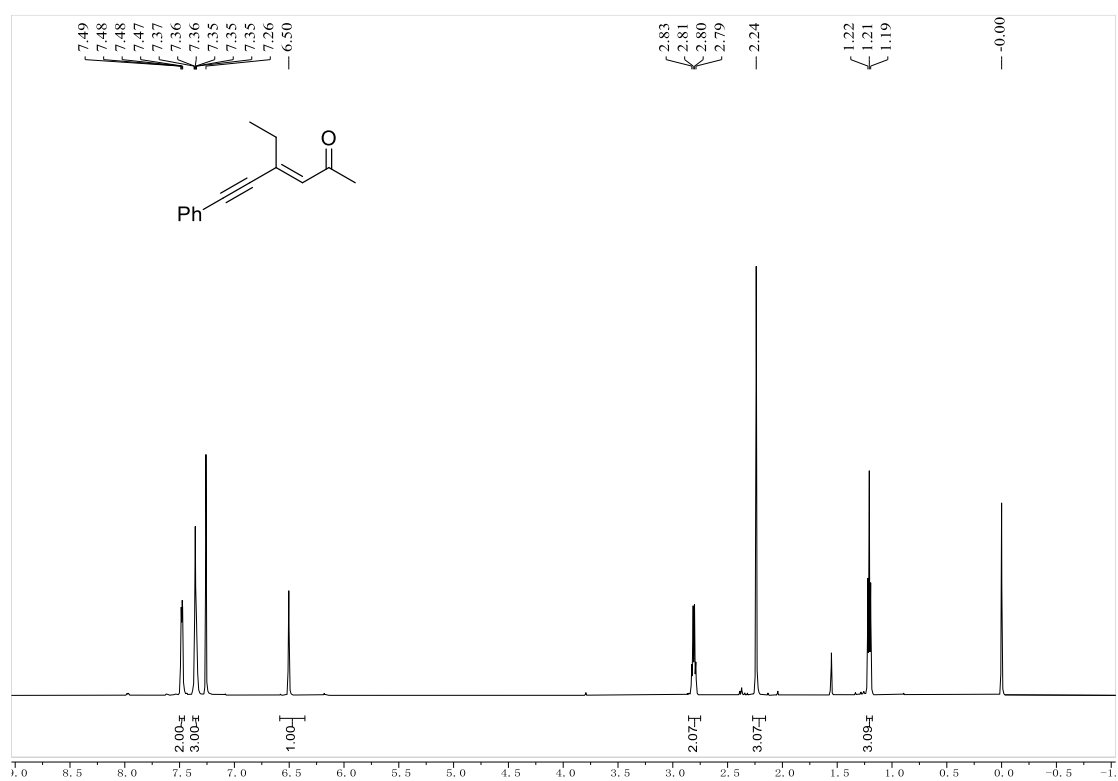

$^{13}\text{C}$  NMR spectra (151 MHz,  $\text{CDCl}_3$ ) of **1a**

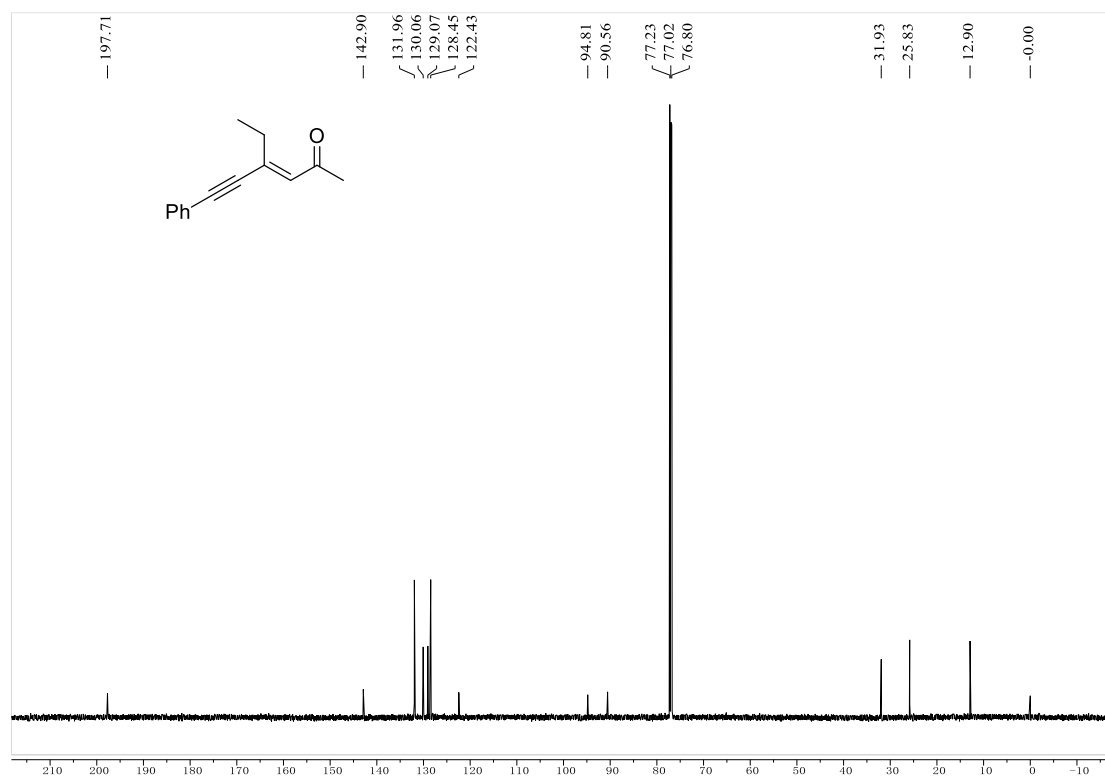

$^1\text{H}$  NMR spectra (600 MHz,  $\text{CDCl}_3$ ) of **2a**

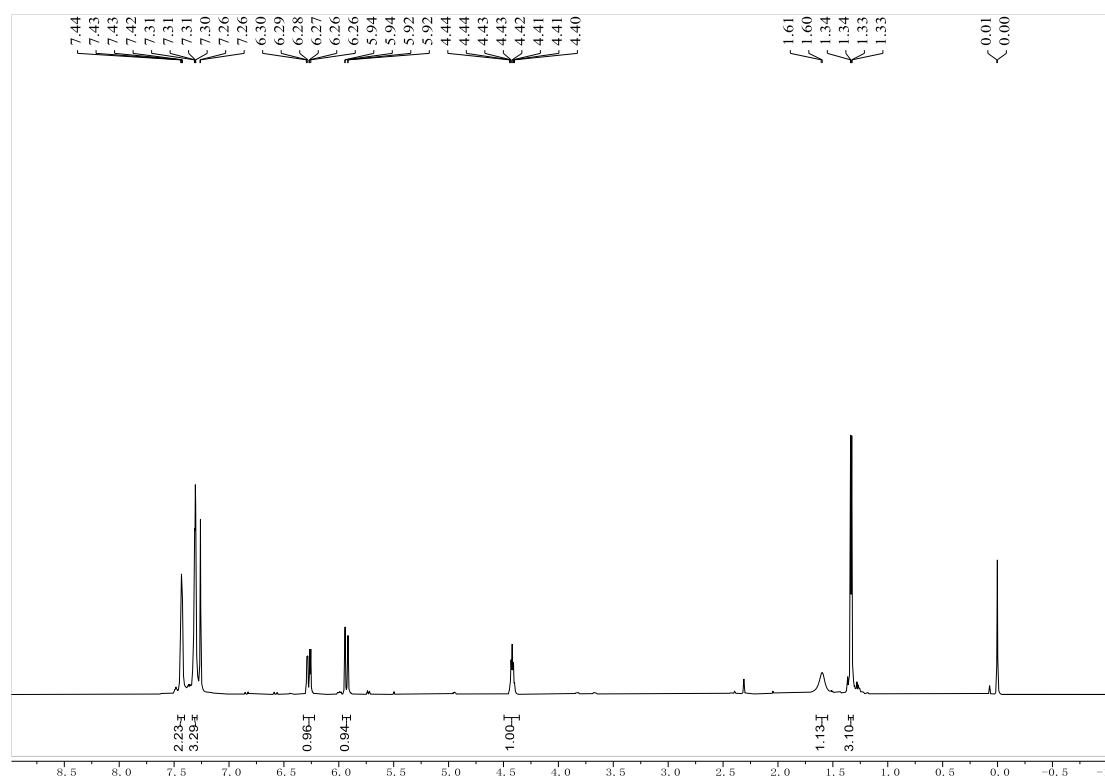

<sup>13</sup>C NMR spectra (151 MHz, CDCl<sub>3</sub>) of **2a**

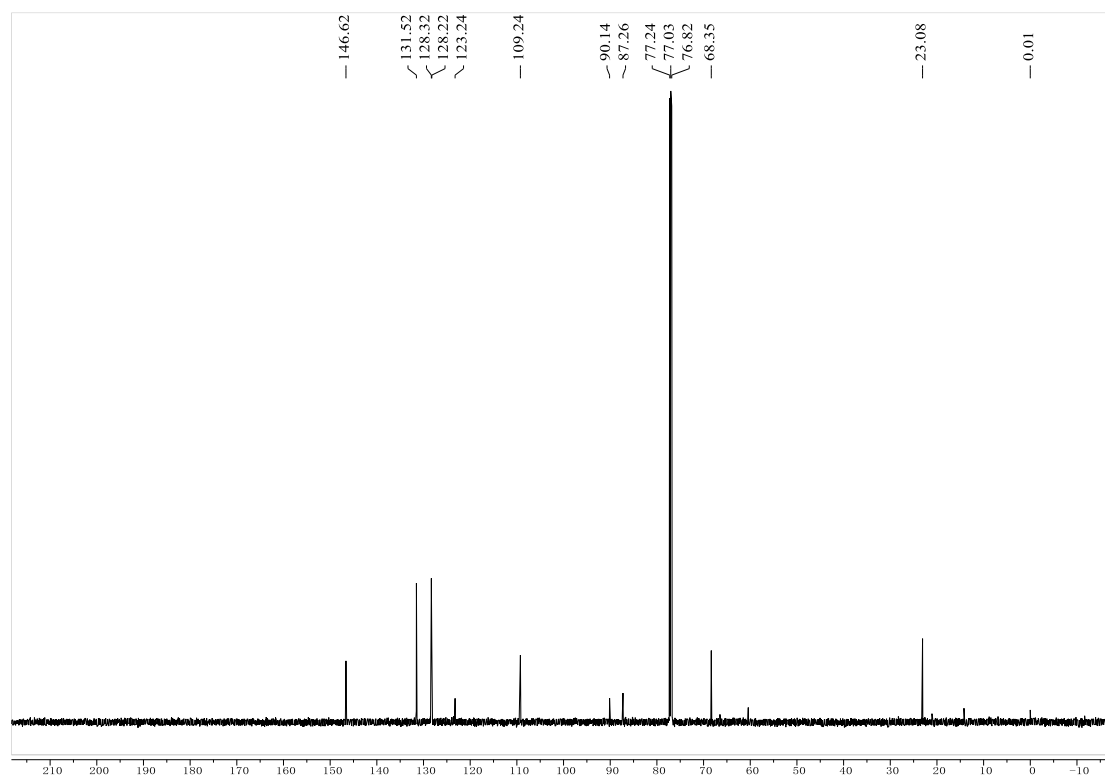

<sup>1</sup>H NMR spectra (600 MHz, CDCl<sub>3</sub>) of **2b**

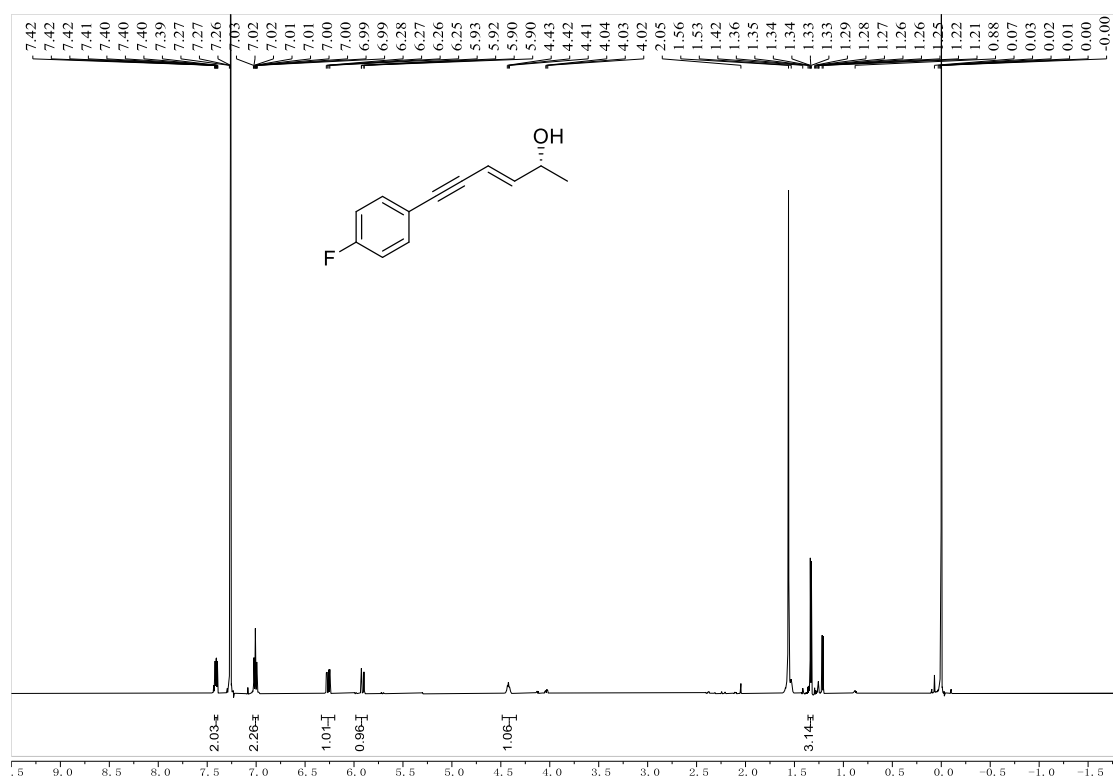

$^{13}\text{C}$  NMR spectra (151 MHz,  $\text{CDCl}_3$ ) of **2b**

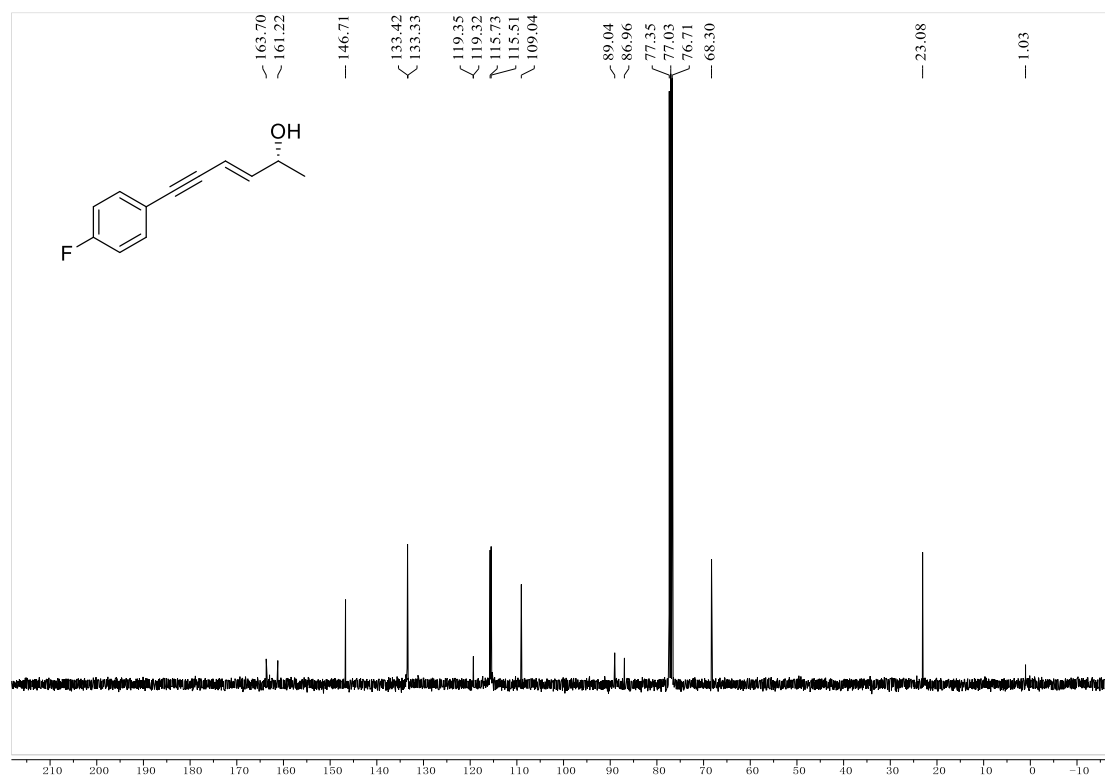

$^{19}\text{F}$  NMR spectra (376 MHz,  $\text{CDCl}_3$ ) of **2b**

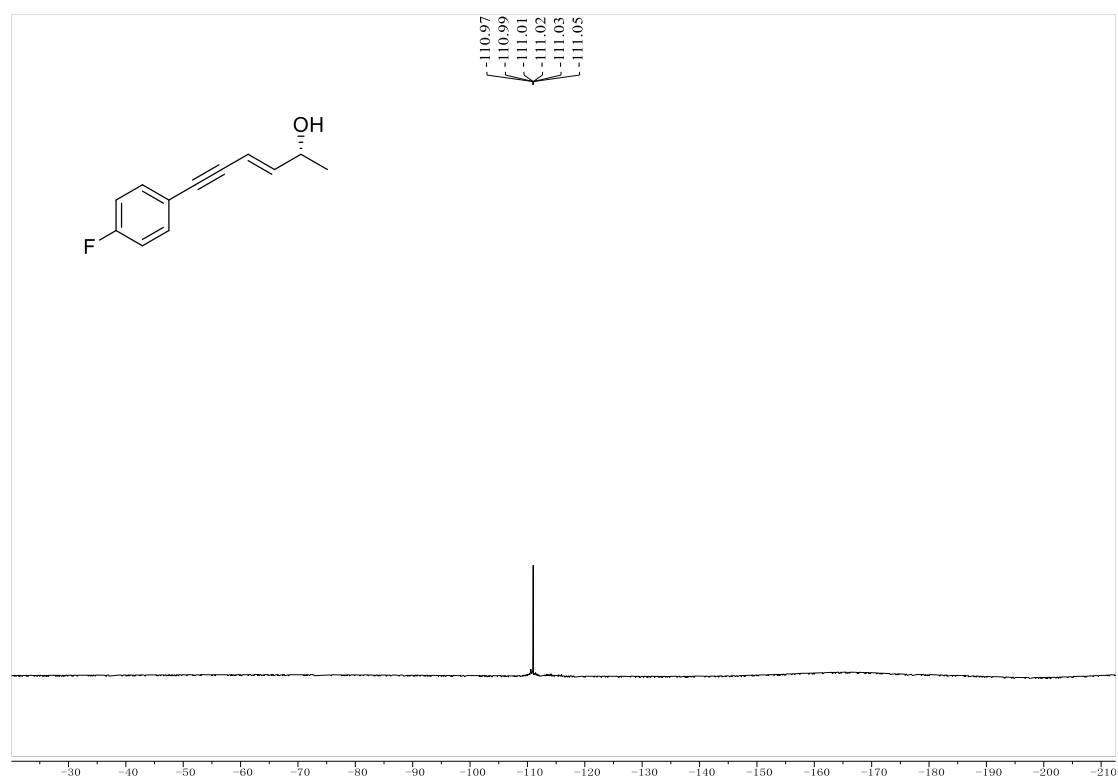

<sup>1</sup>H NMR spectra (400 MHz, CDCl<sub>3</sub>) of **2c**

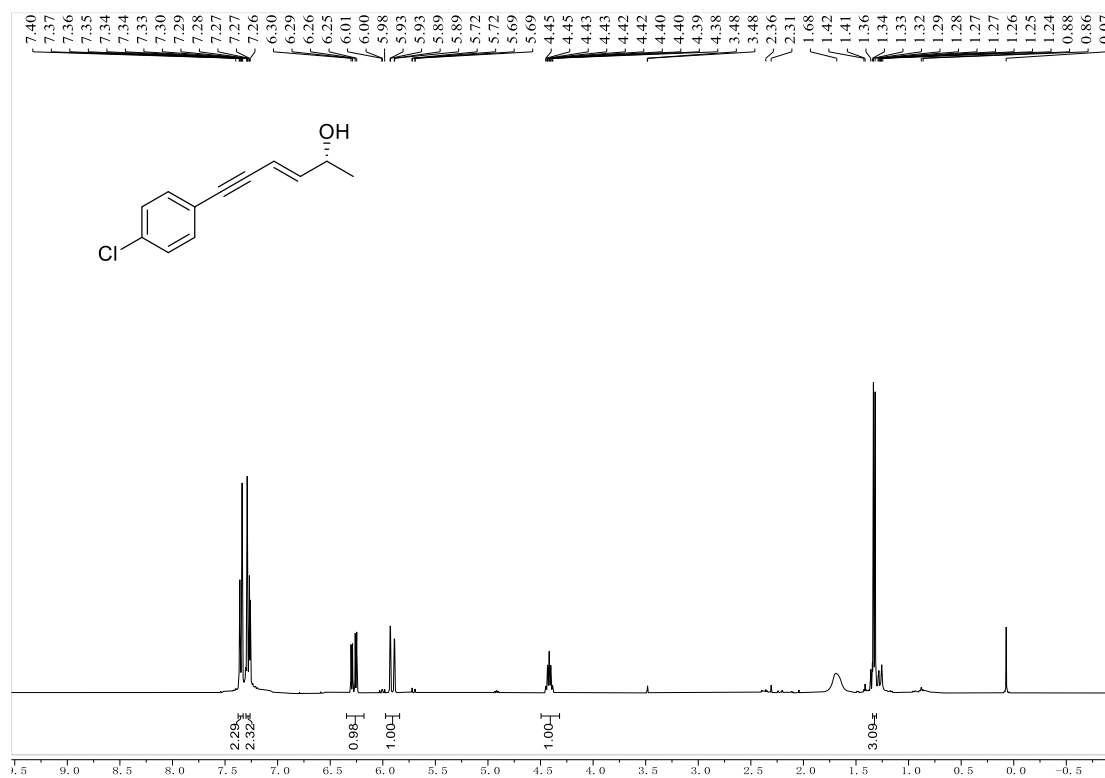

<sup>13</sup>C NMR spectra (101 MHz, CDCl<sub>3</sub>) of **2c**

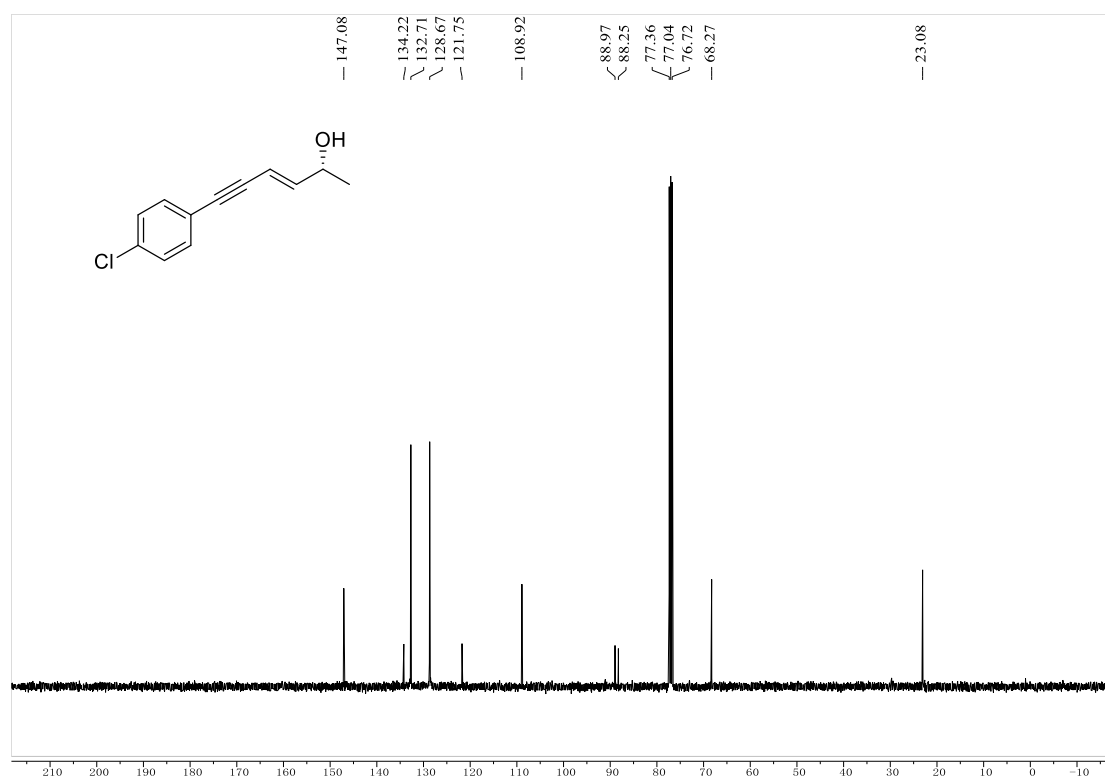

$^1\text{H}$  NMR spectra (400 MHz,  $\text{CDCl}_3$ ) of **2d**

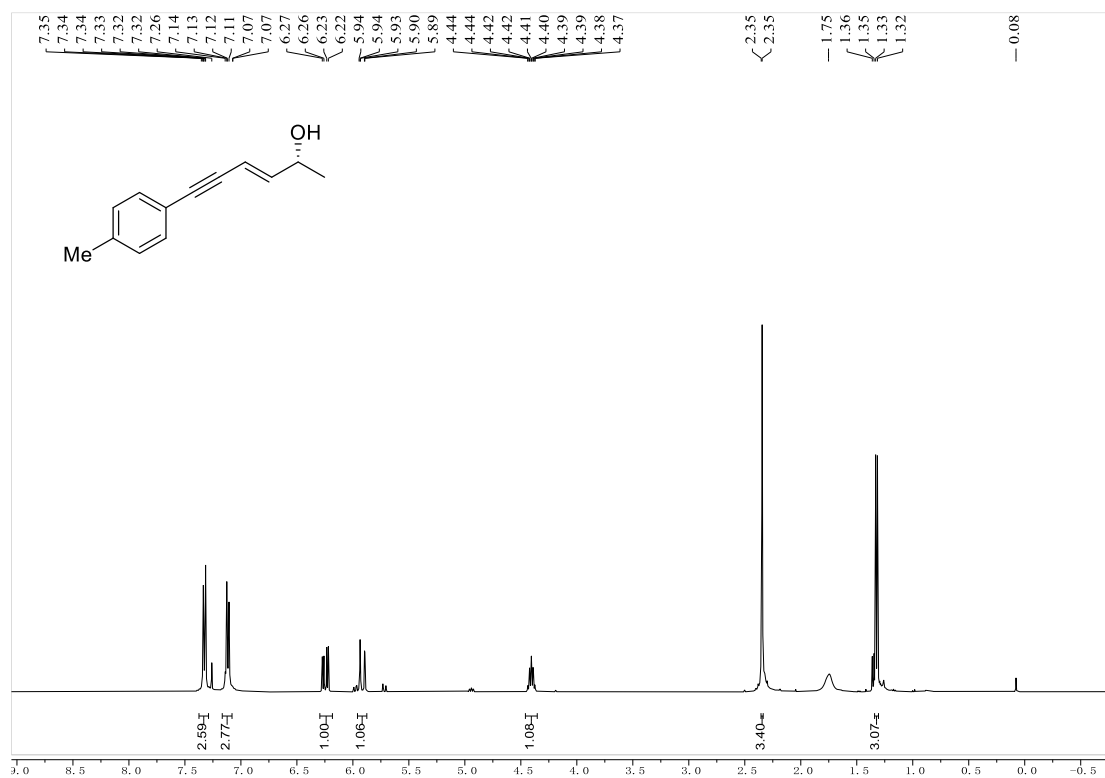

$^{13}\text{C}$  NMR spectra (101 MHz,  $\text{CDCl}_3$ ) of **2d**

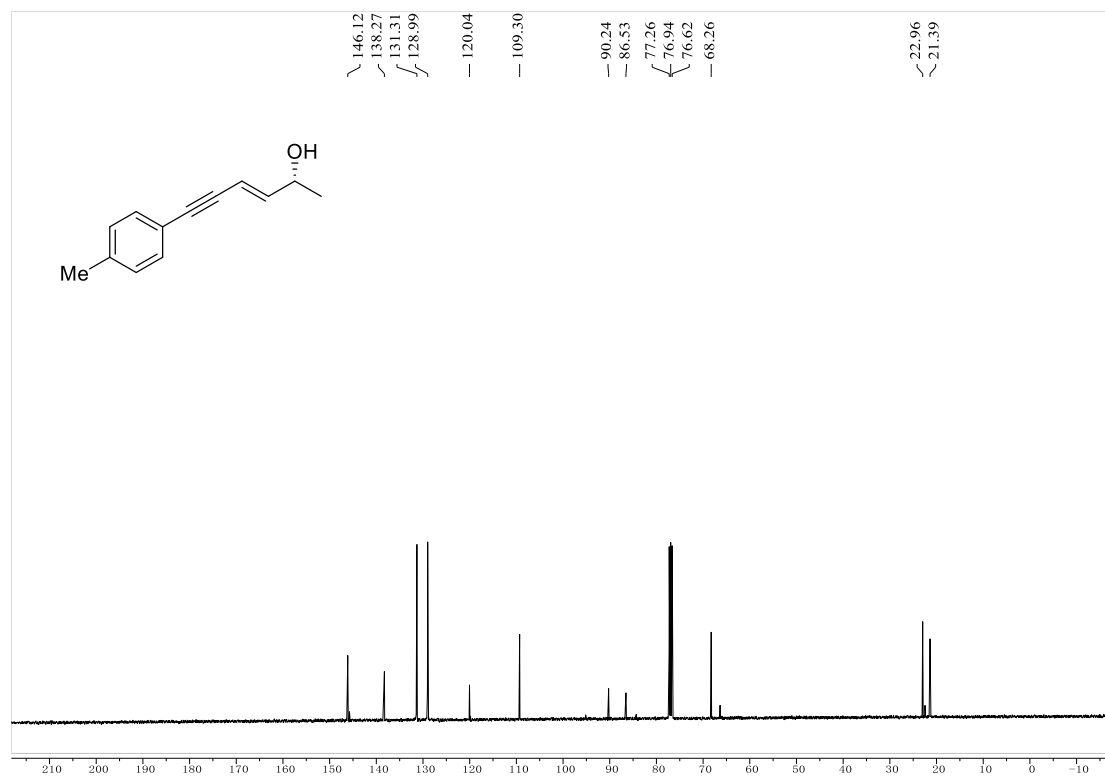



<sup>1</sup>H NMR spectra (400 MHz, CDCl<sub>3</sub>) of **2e**

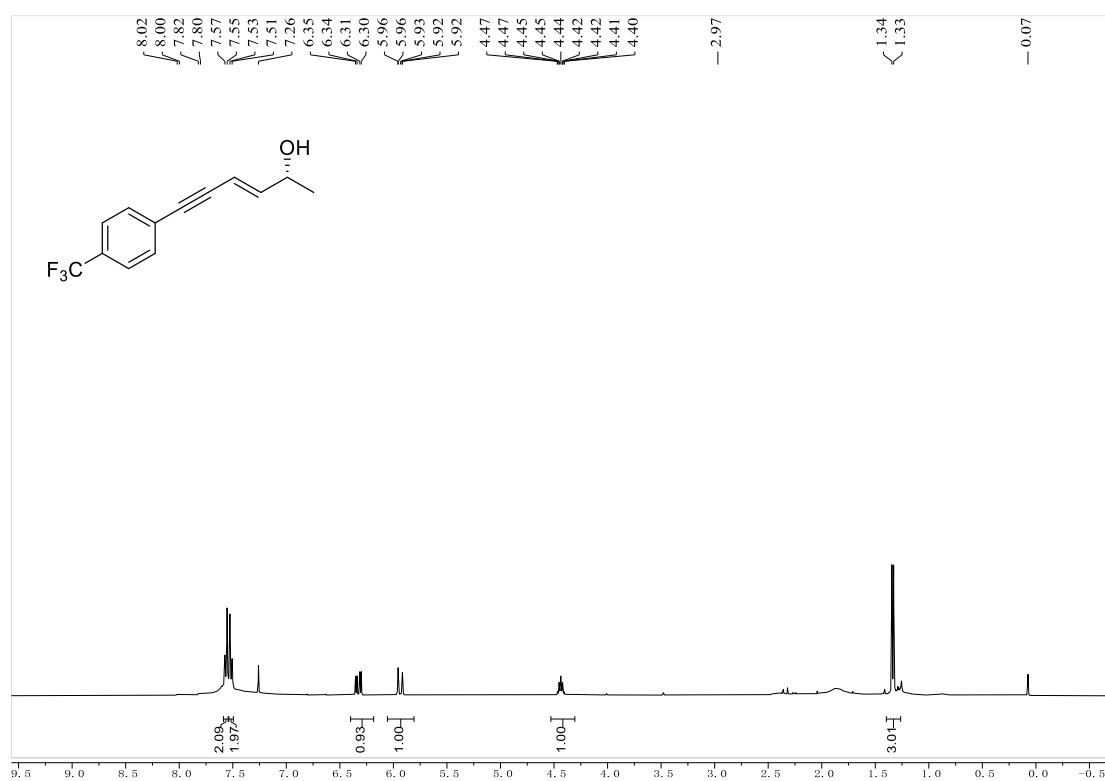

<sup>13</sup>C NMR spectra (101 MHz, CDCl<sub>3</sub>) of **2e**

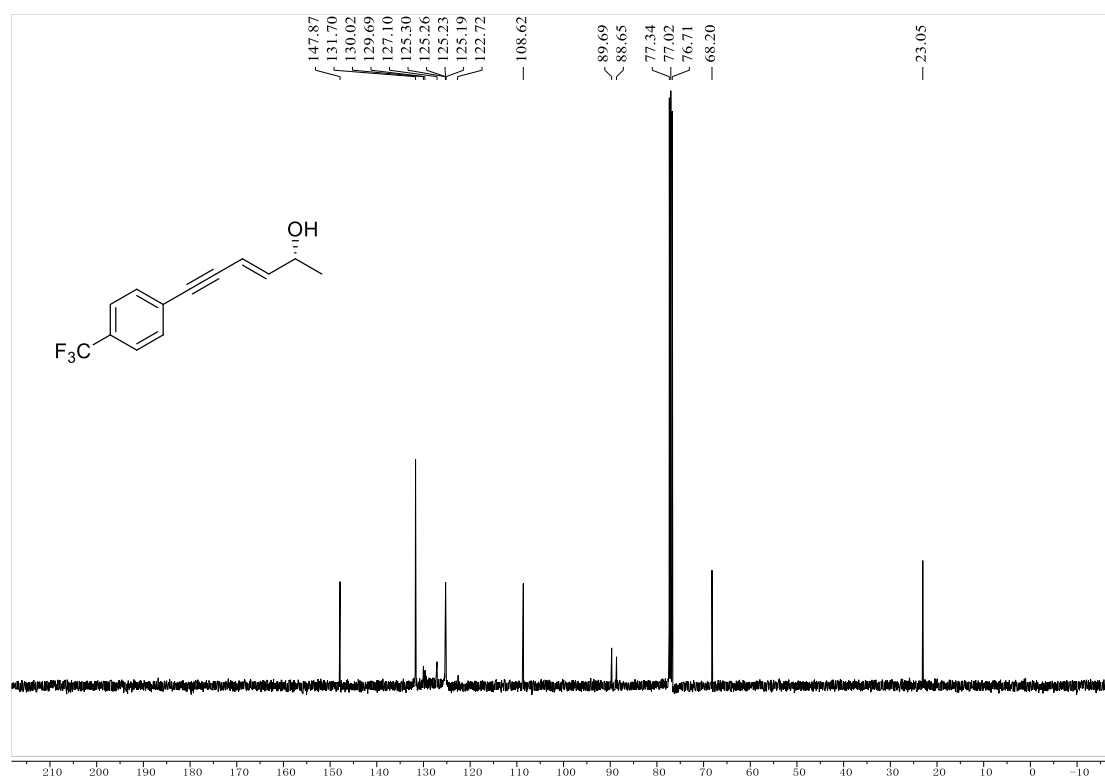

$^{19}\text{F}$  NMR spectra (377 MHz,  $\text{CDCl}_3$ ) of **2e**

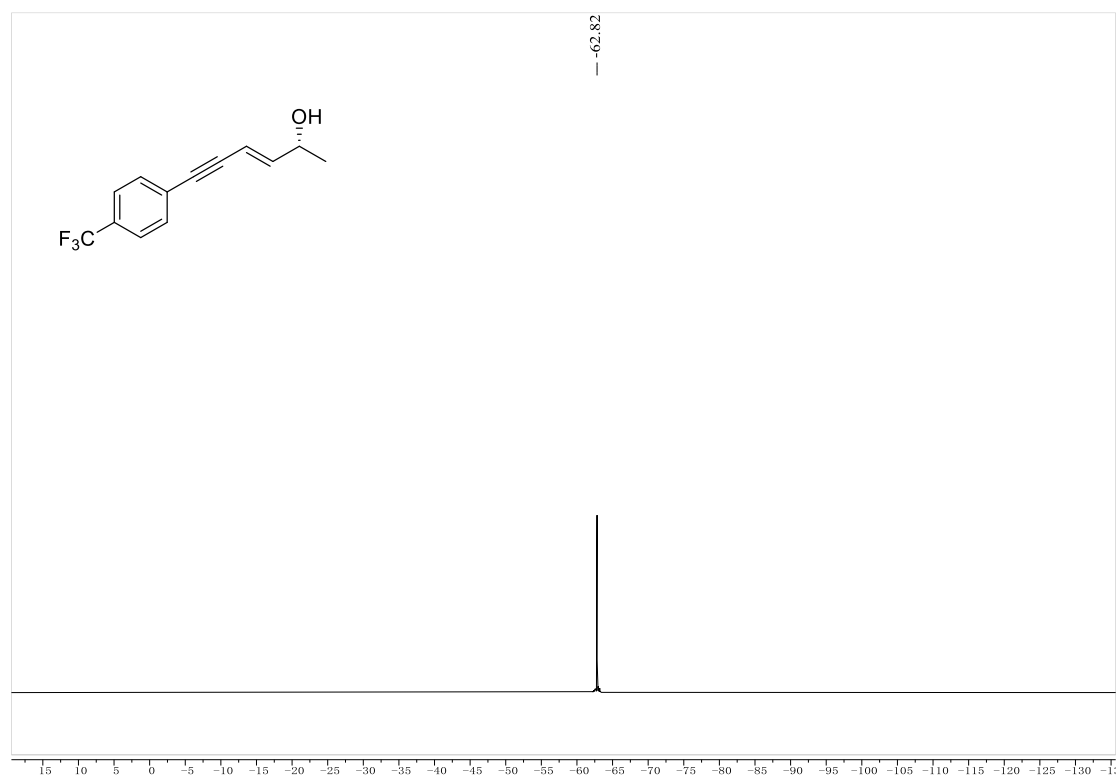

$^1\text{H}$  NMR spectra (600 MHz,  $\text{CDCl}_3$ ) of **2f**

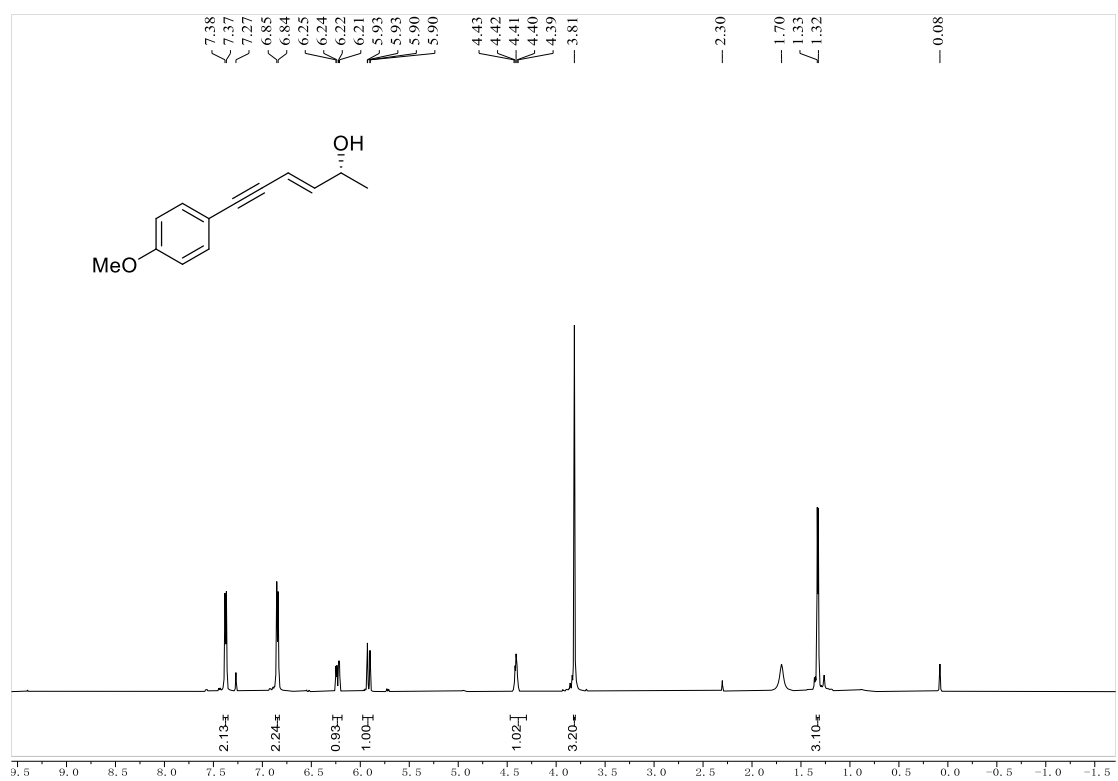

$^{13}\text{C}$  NMR spectra (151 MHz,  $\text{CDCl}_3$ ) of **2f**

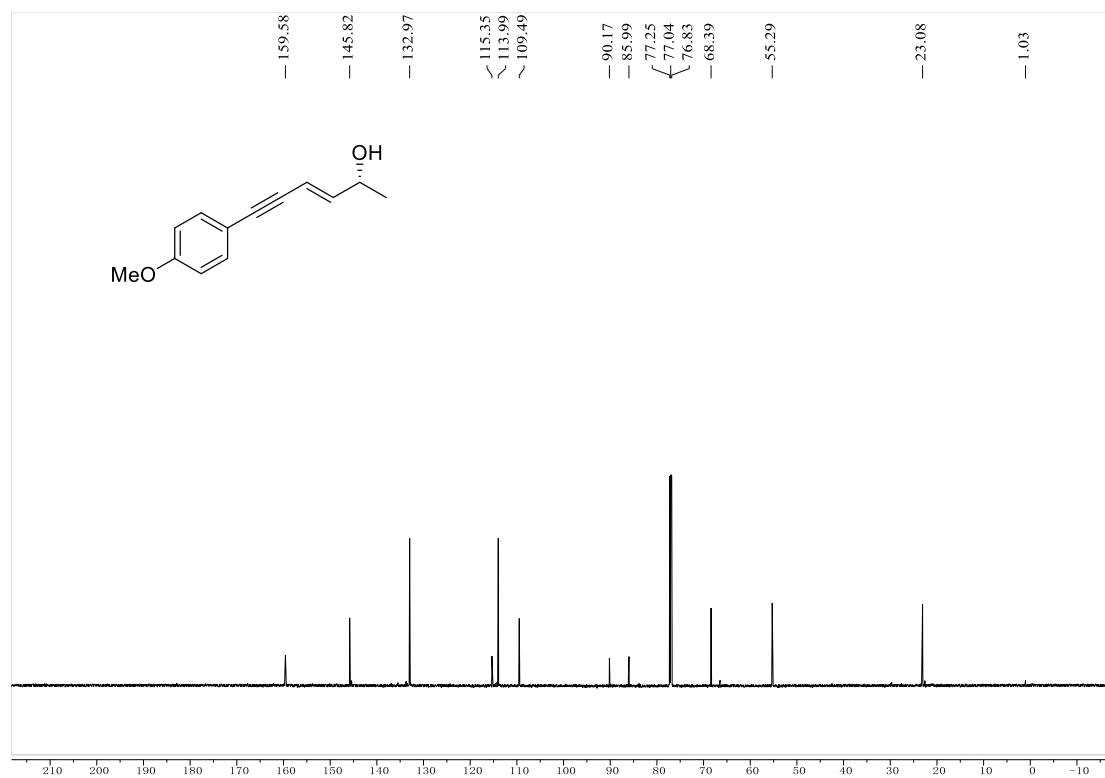

$^1\text{H}$  NMR spectra (600 MHz,  $\text{CDCl}_3$ ) of **2g**

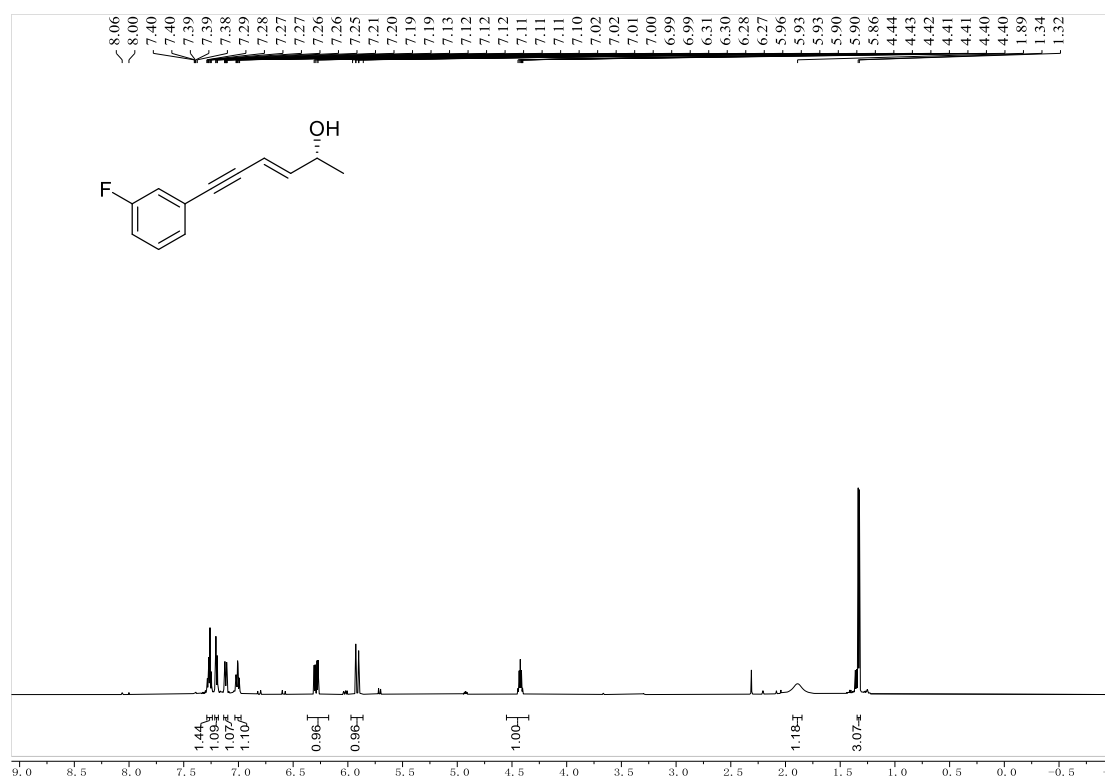

<sup>13</sup>C NMR spectra (151 MHz, CDCl<sub>3</sub>) of **2g**

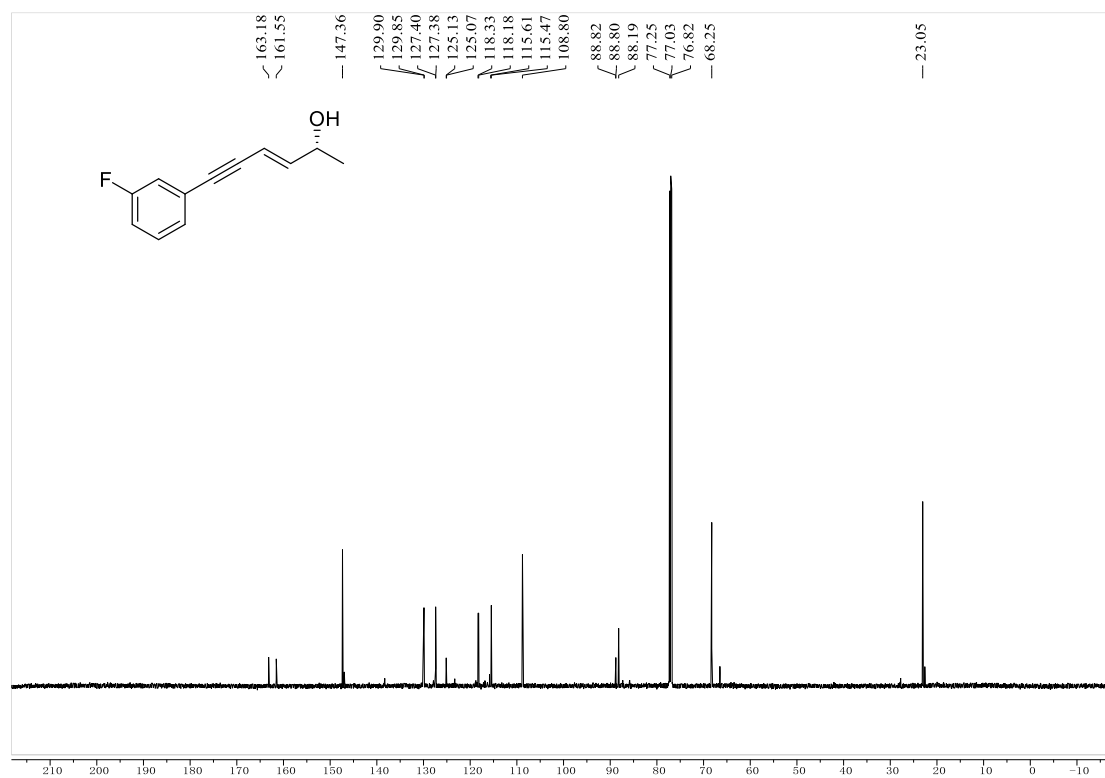

<sup>19</sup>F NMR spectra (376 MHz, CDCl<sub>3</sub>) of **2g**

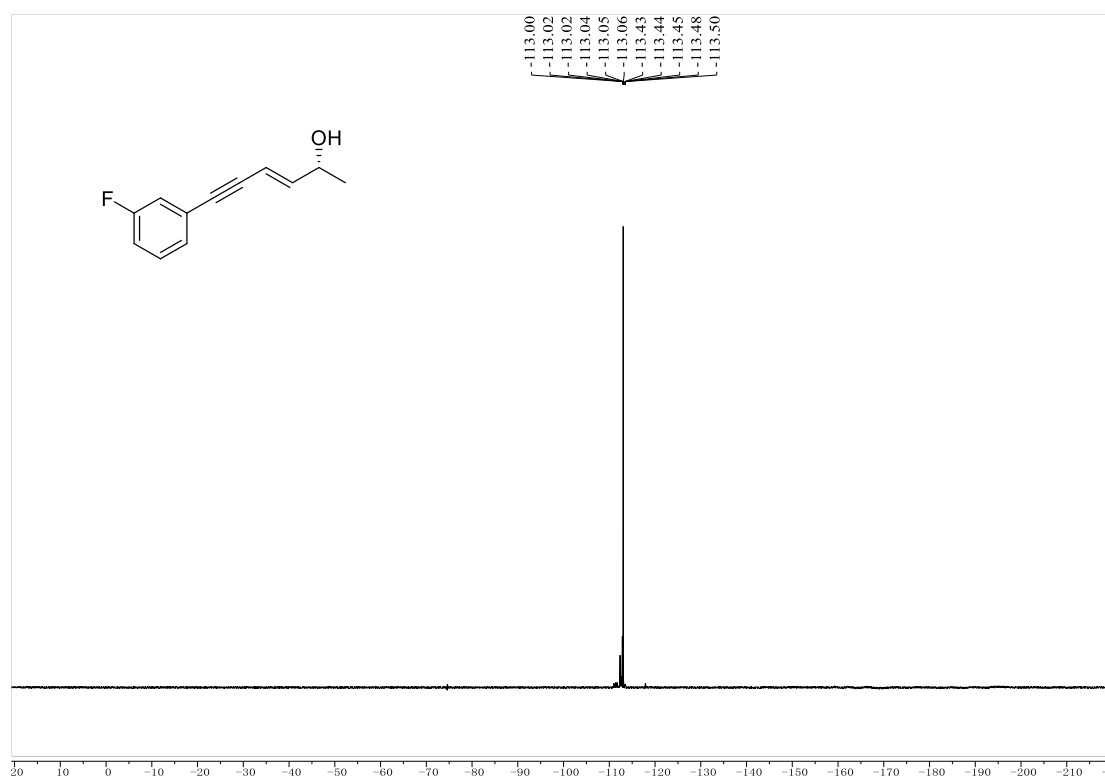

<sup>1</sup>H NMR spectra (600 MHz, CDCl<sub>3</sub>) of **2h**

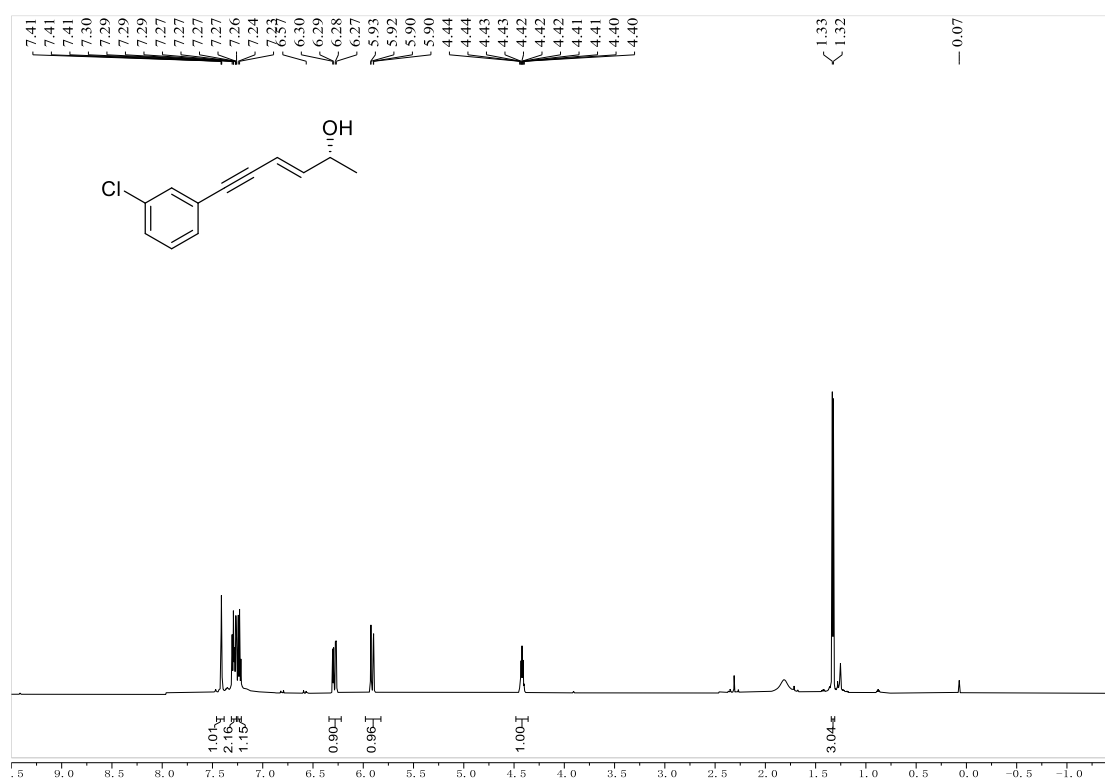

<sup>13</sup>C NMR spectra (151 MHz, CDCl<sub>3</sub>) of **2h**

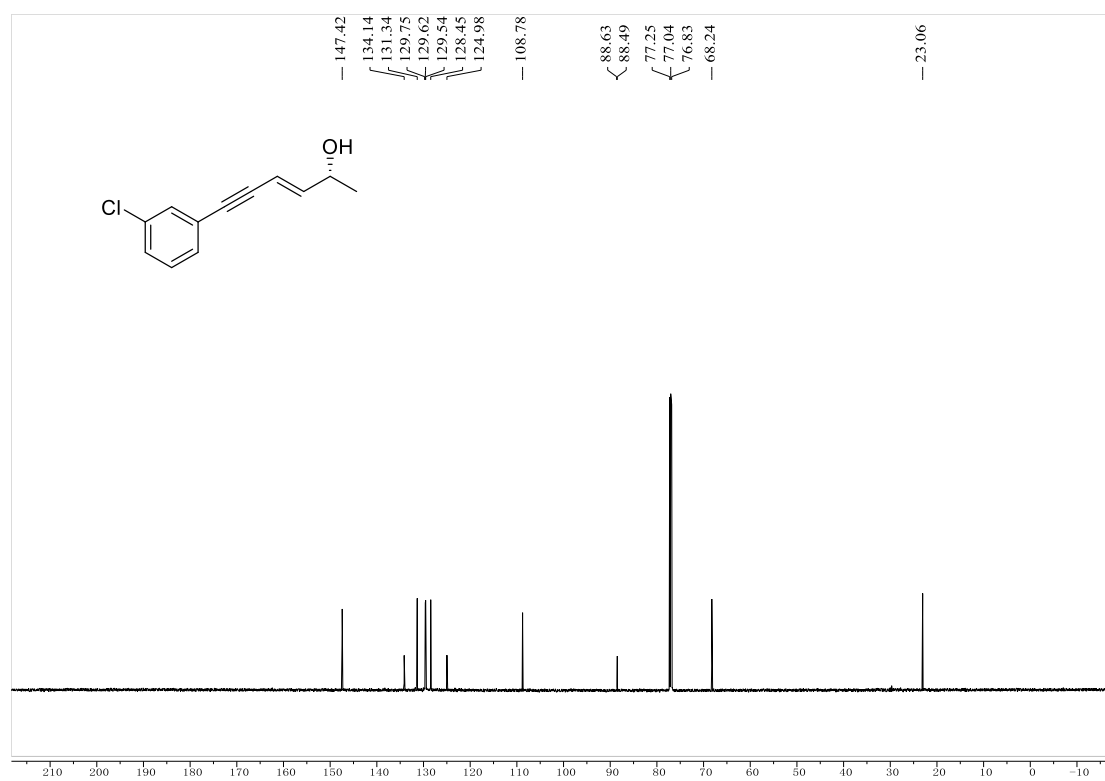

$^1\text{H}$  NMR spectra (600 MHz,  $\text{CDCl}_3$ ) of **2i**

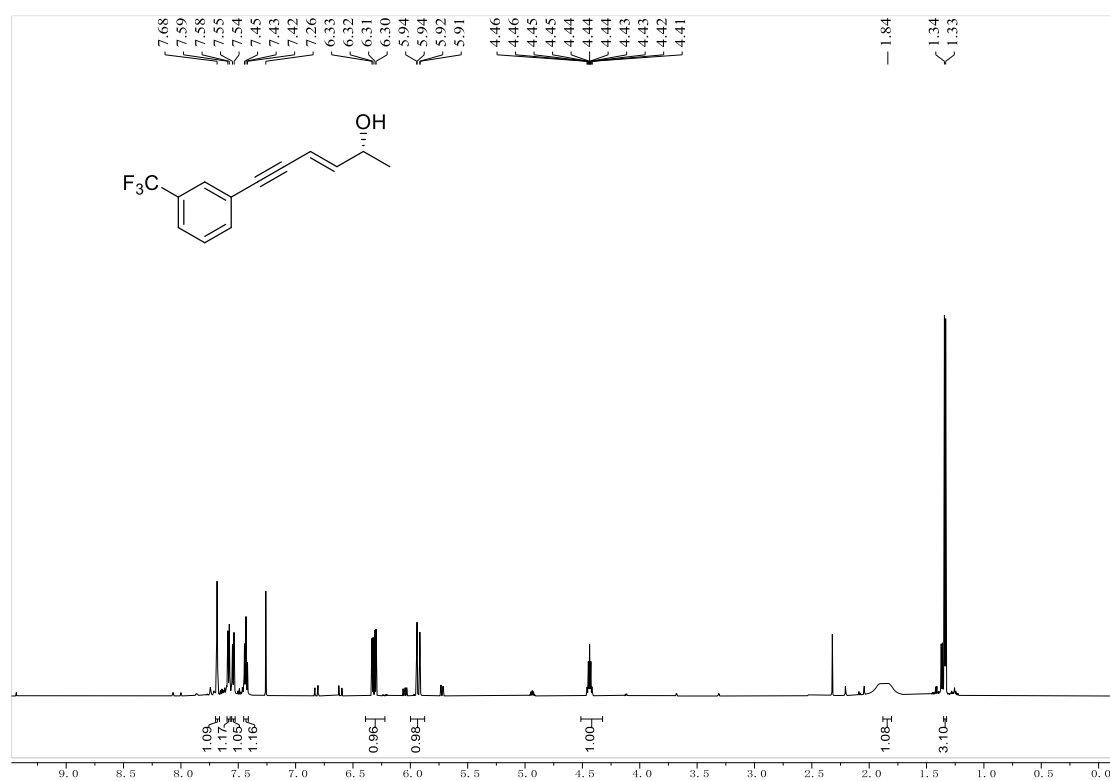

$^{13}\text{C}$  NMR spectra (151 MHz,  $\text{CDCl}_3$ ) of **2i**

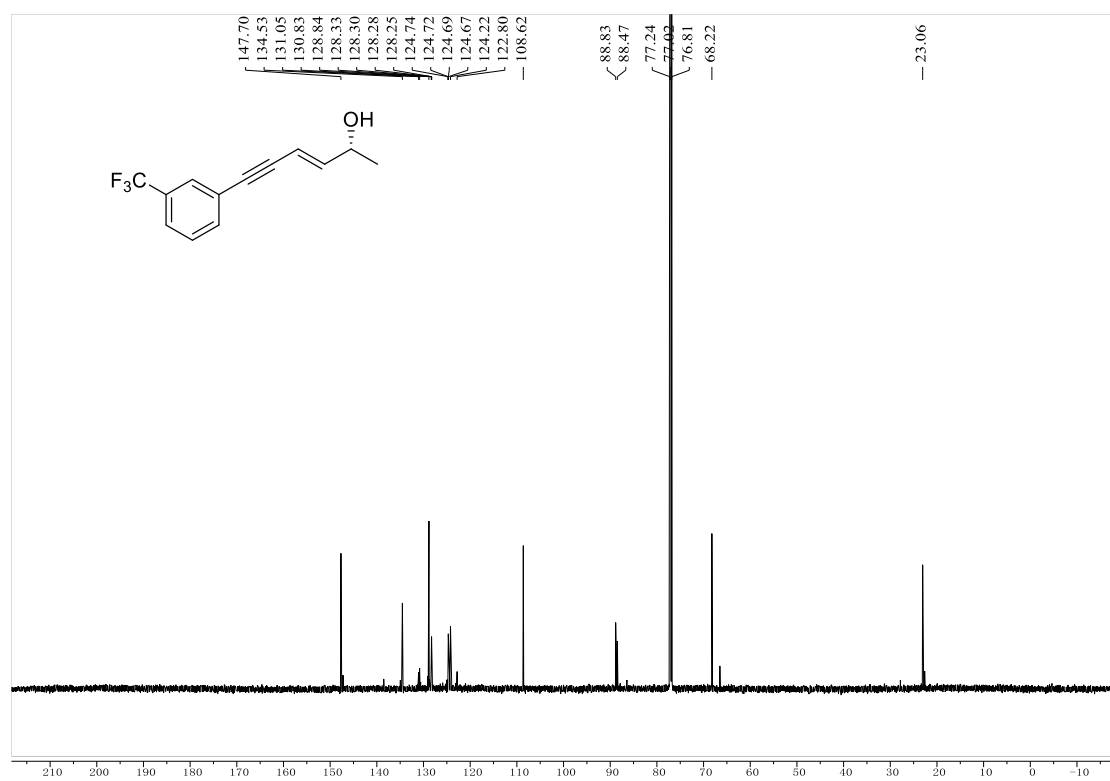

<sup>19</sup>F NMR spectra (376 MHz, CDCl<sub>3</sub>) of **2i**

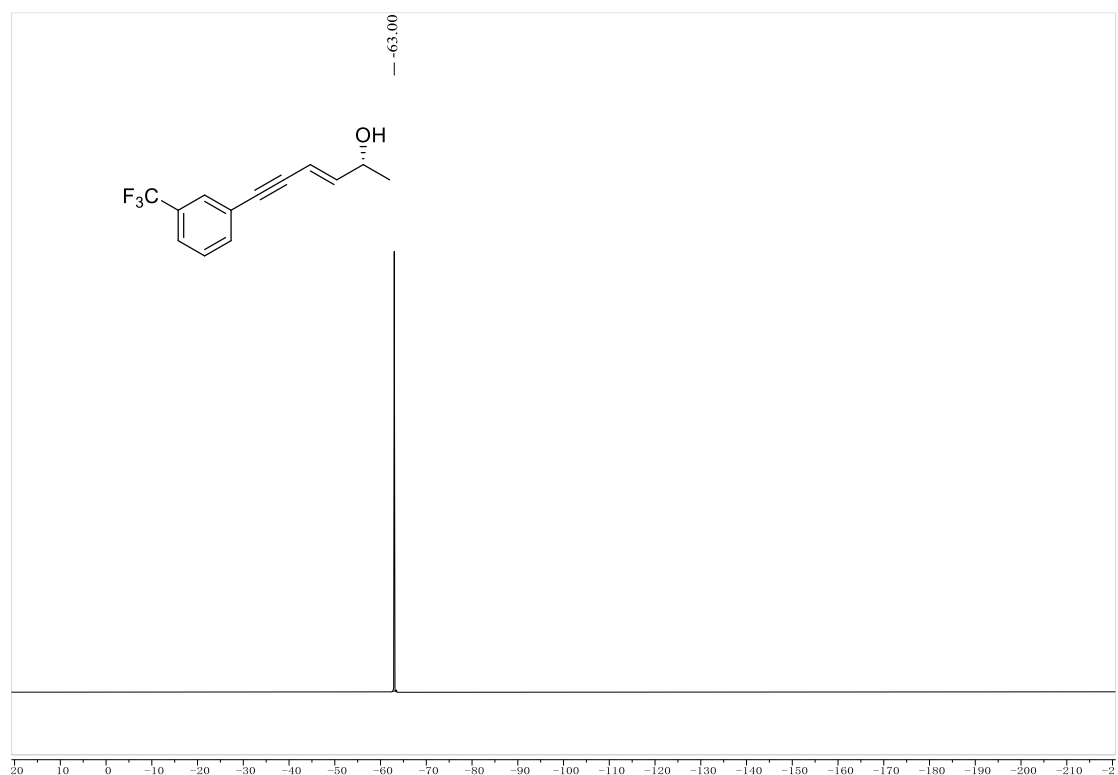

<sup>1</sup>H NMR spectra (400 MHz, CDCl<sub>3</sub>) of **2j**

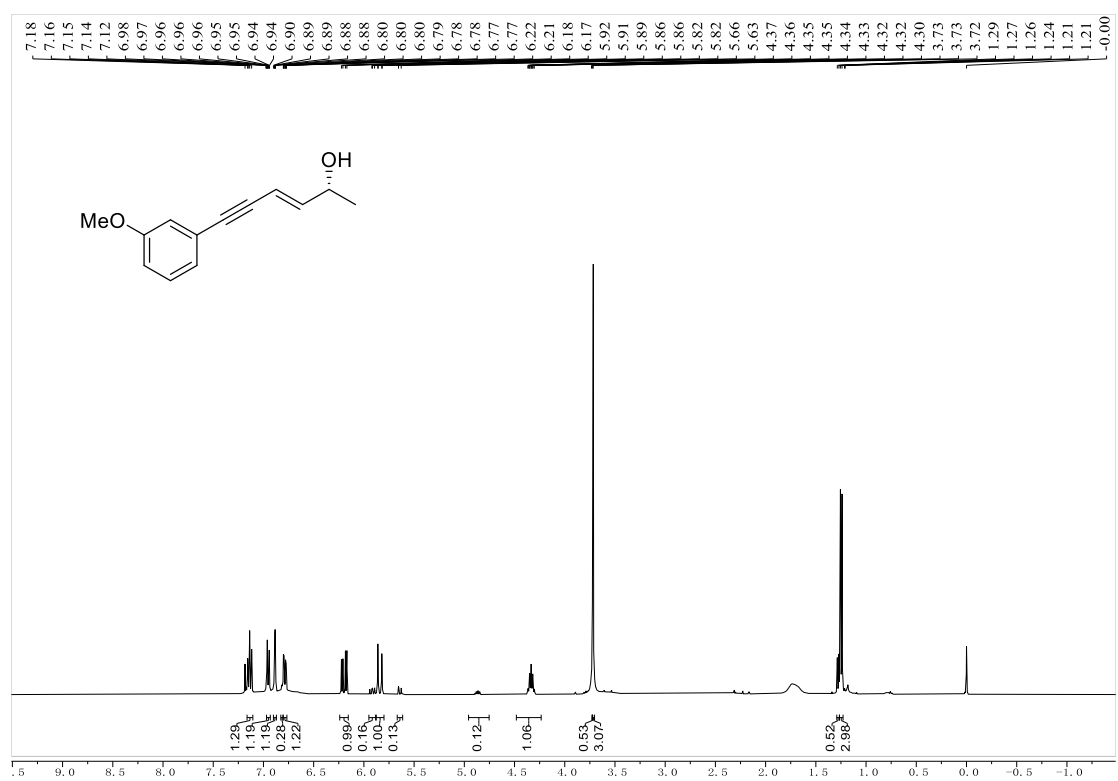

<sup>13</sup>C NMR spectra (101 MHz, CDCl<sub>3</sub>) of **2j**

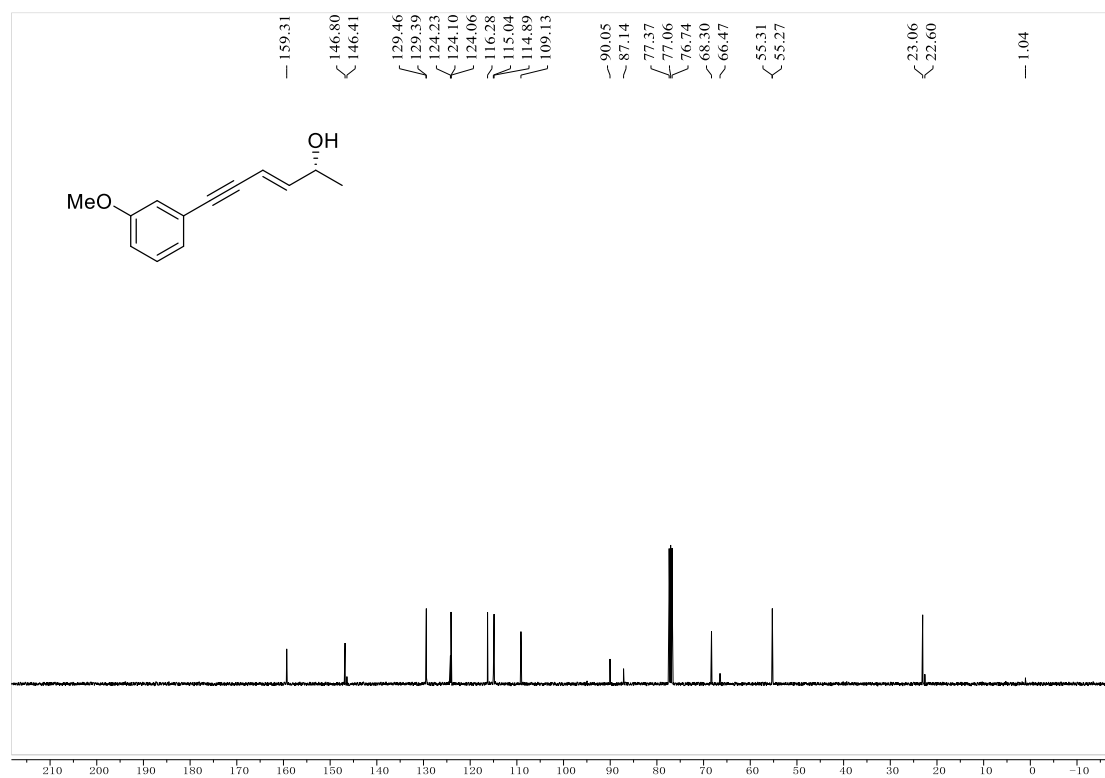

<sup>1</sup>H NMR spectra (600 MHz, CDCl<sub>3</sub>) of **2k**

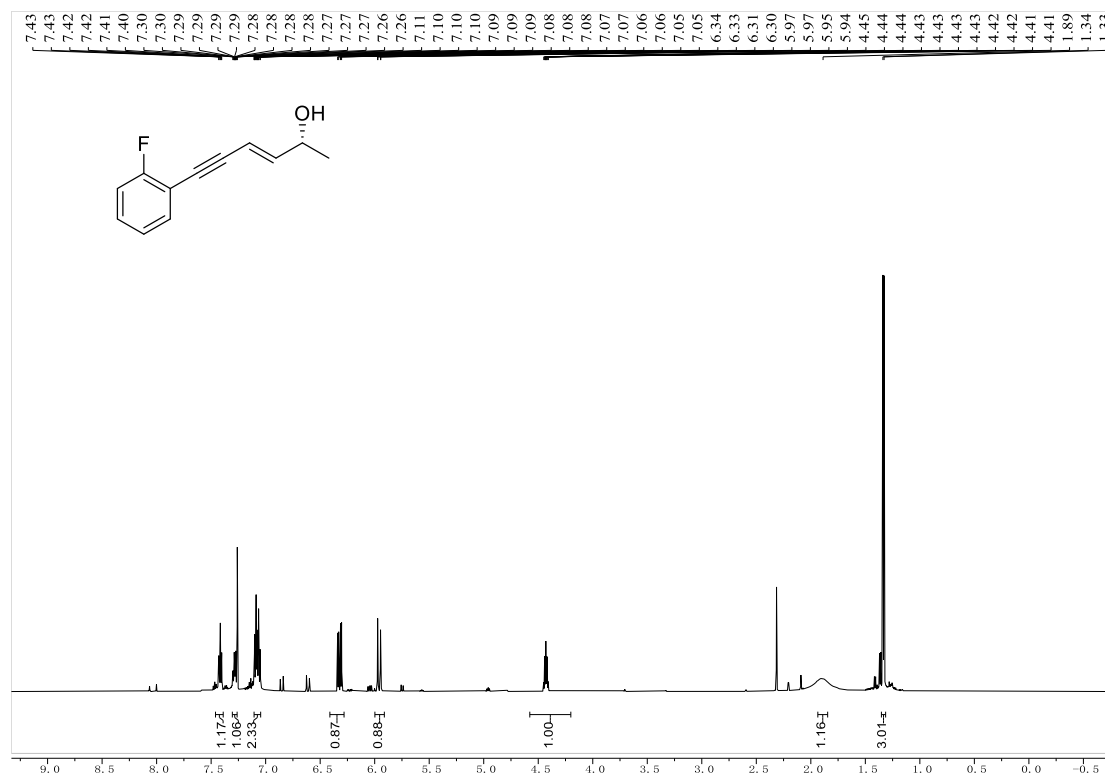



$^{13}\text{C}$  NMR spectra (151 MHz,  $\text{CDCl}_3$ ) of **2k**

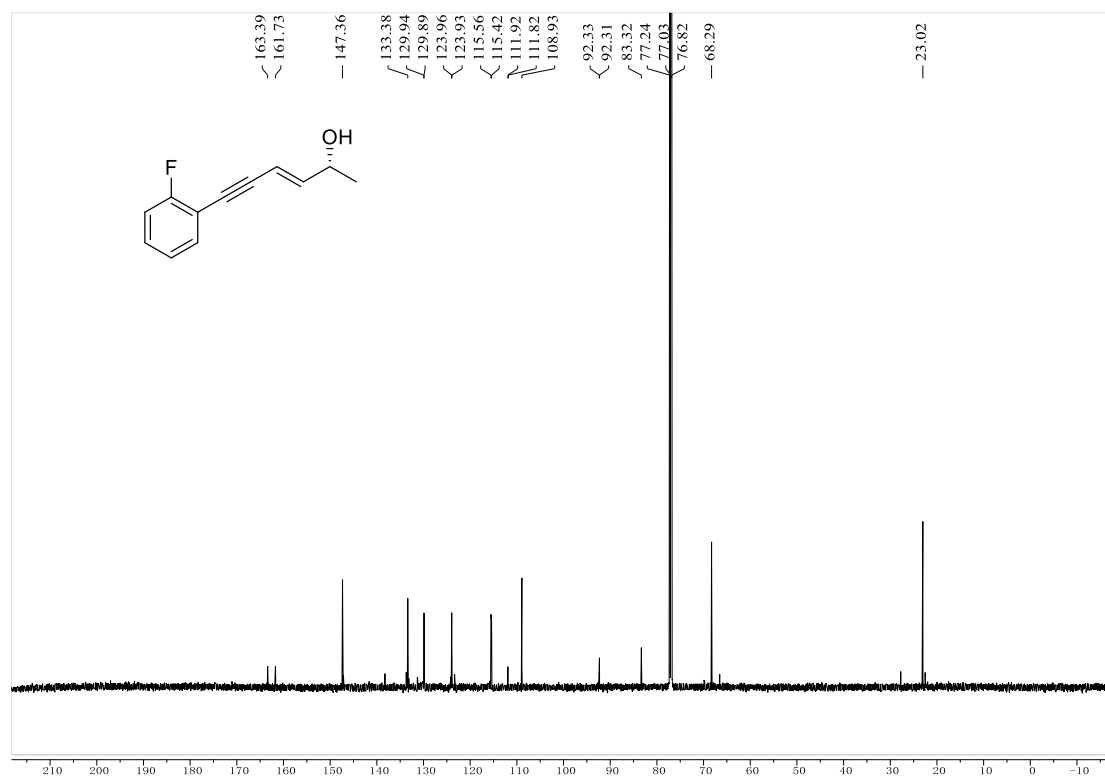

$^{19}\text{F}$  NMR spectra (376 MHz,  $\text{CDCl}_3$ ) of **2k**

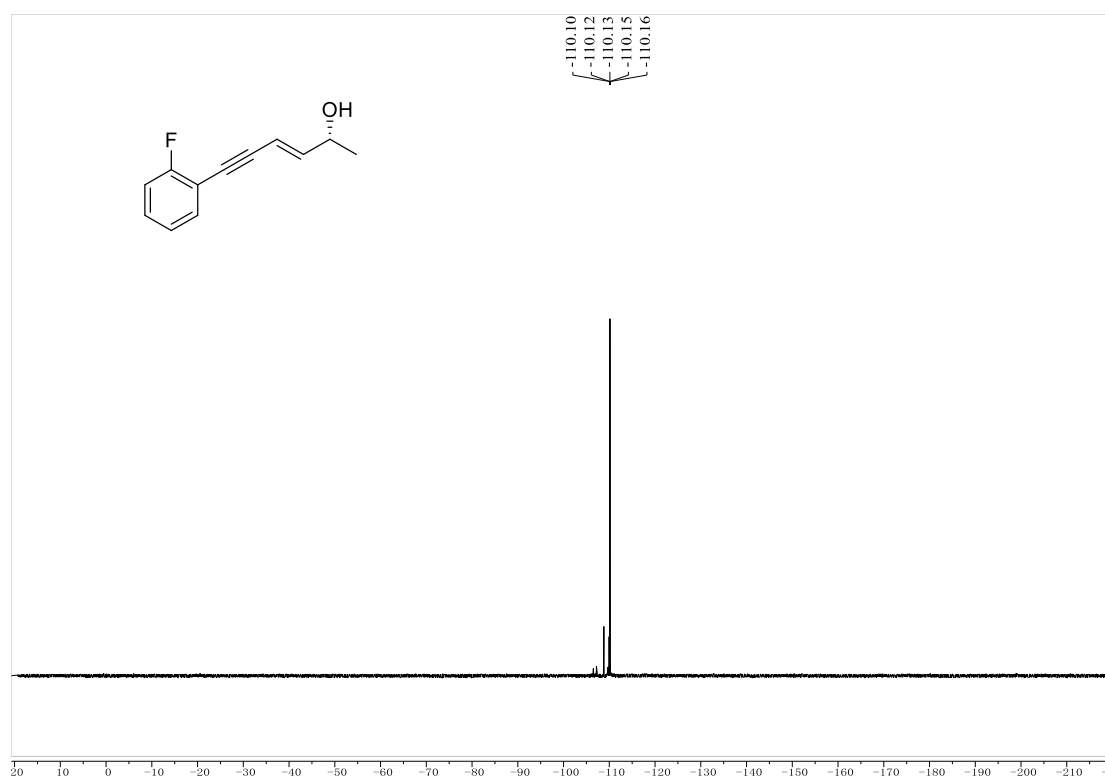

<sup>1</sup>H NMR spectra (600 MHz, CDCl<sub>3</sub>) of **21**

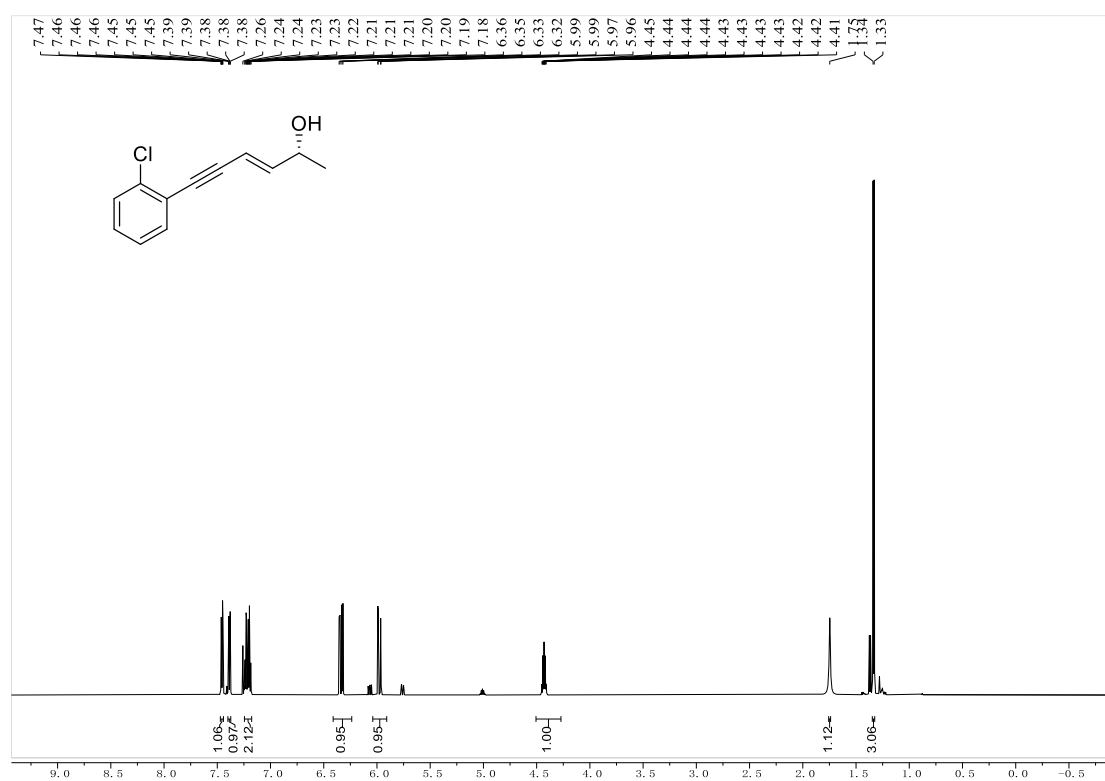

<sup>13</sup>C NMR spectra (151 MHz, CDCl<sub>3</sub>) of **21**

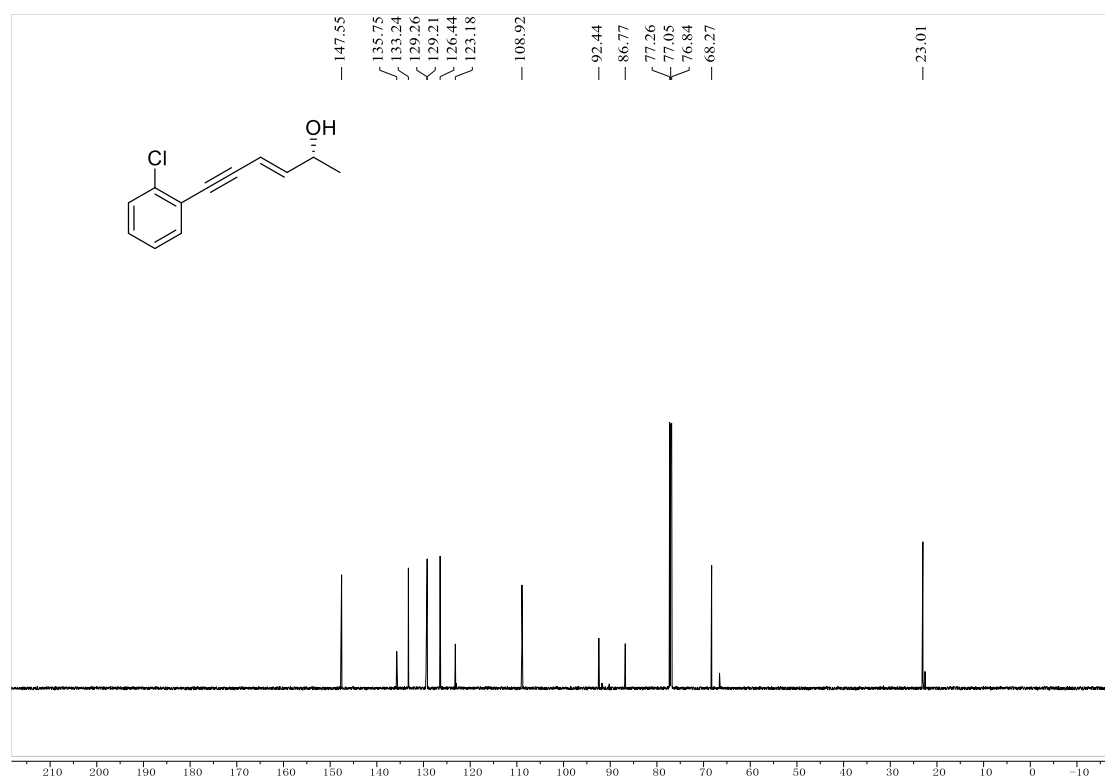

<sup>1</sup>H NMR spectra (600 MHz, CDCl<sub>3</sub>) of **2m**

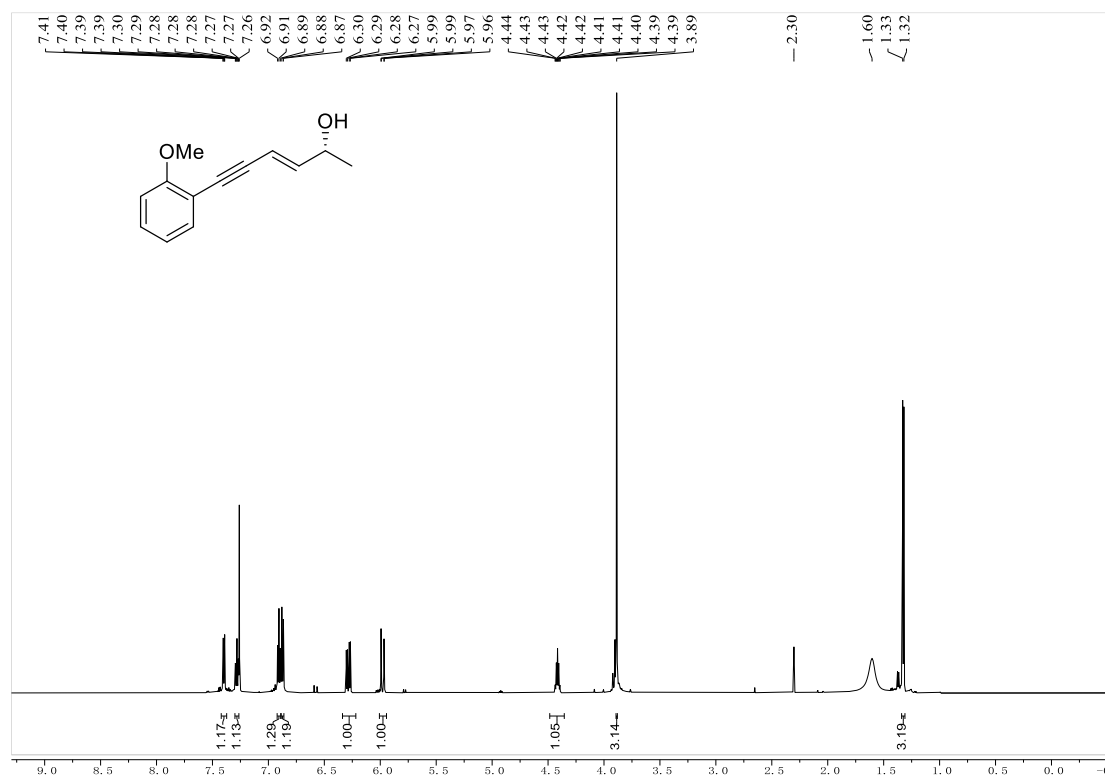

<sup>13</sup>C NMR spectra (151 MHz, CDCl<sub>3</sub>) of **2m**

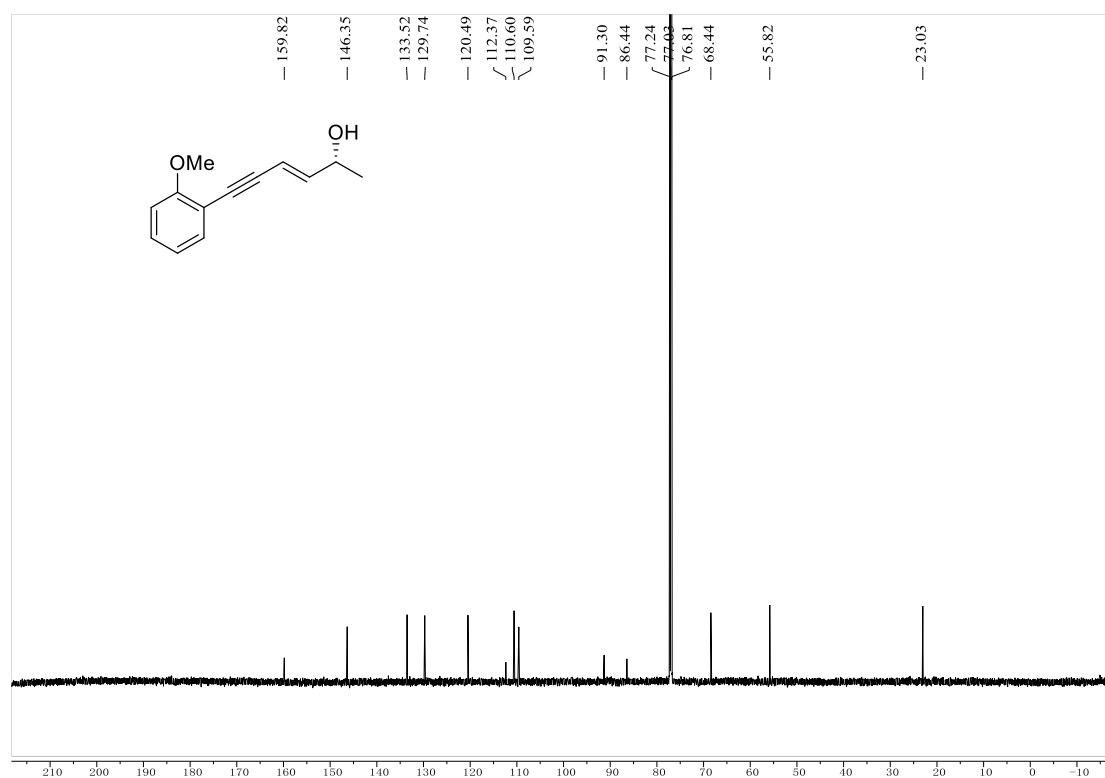

<sup>1</sup>H NMR spectra (600 MHz, CDCl<sub>3</sub>) of **2n**

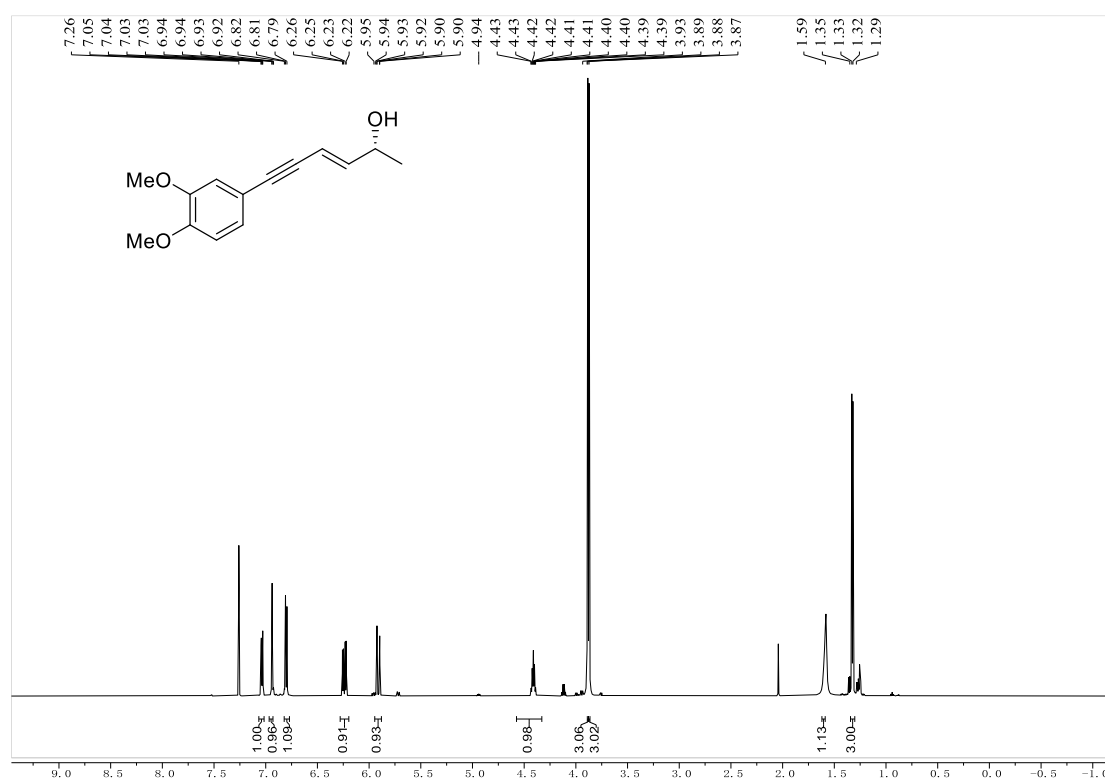

<sup>13</sup>C NMR spectra (151 MHz, CDCl<sub>3</sub>) of **2n**

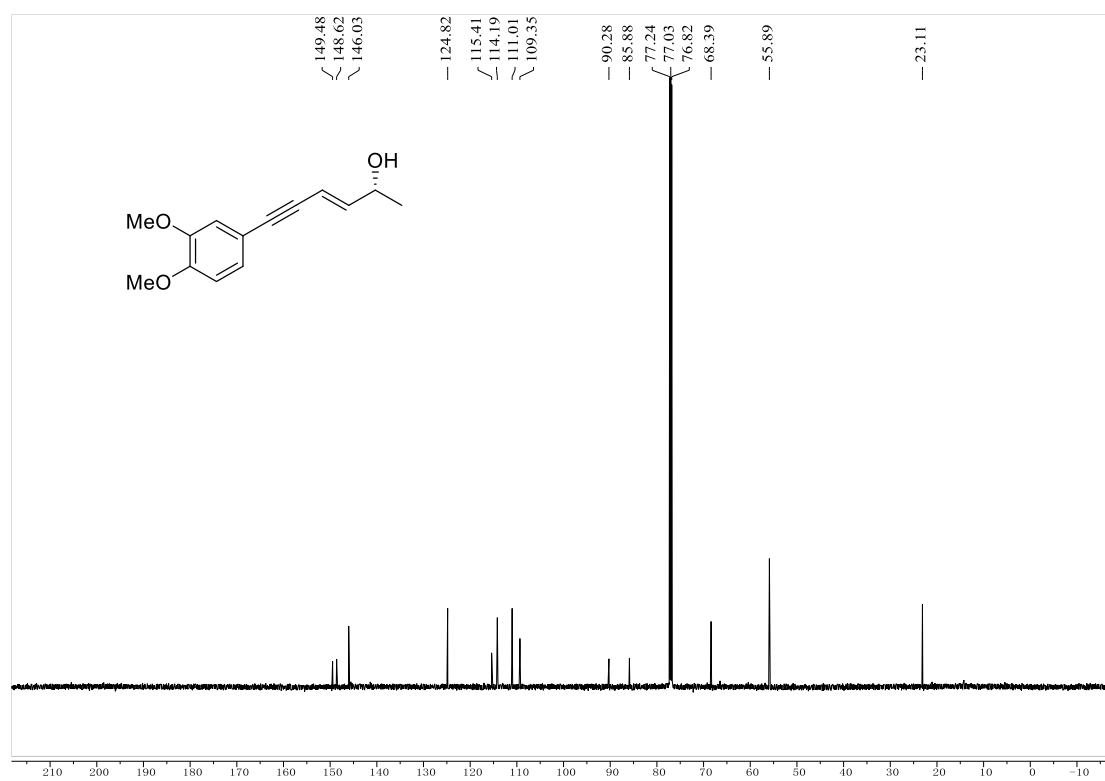

$^1\text{H}$  NMR spectra (600 MHz,  $\text{CDCl}_3$ ) of **2o**

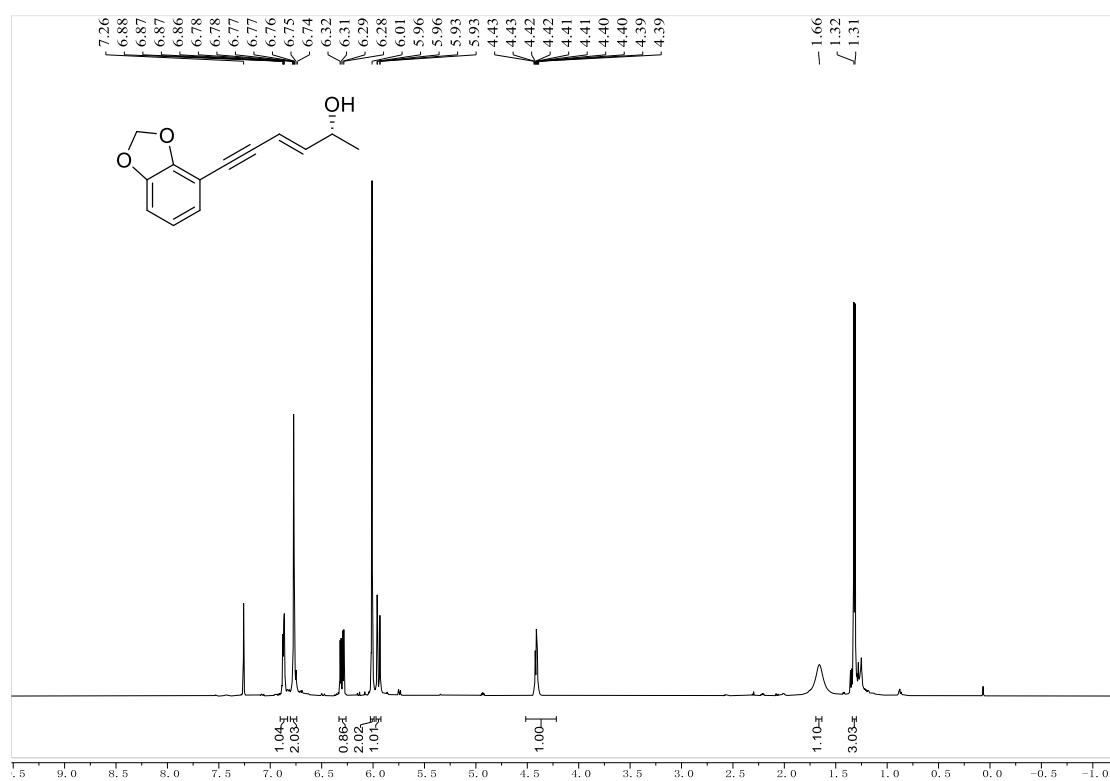

$^{13}\text{C}$  NMR spectra (151 MHz,  $\text{CDCl}_3$ ) of **2o**

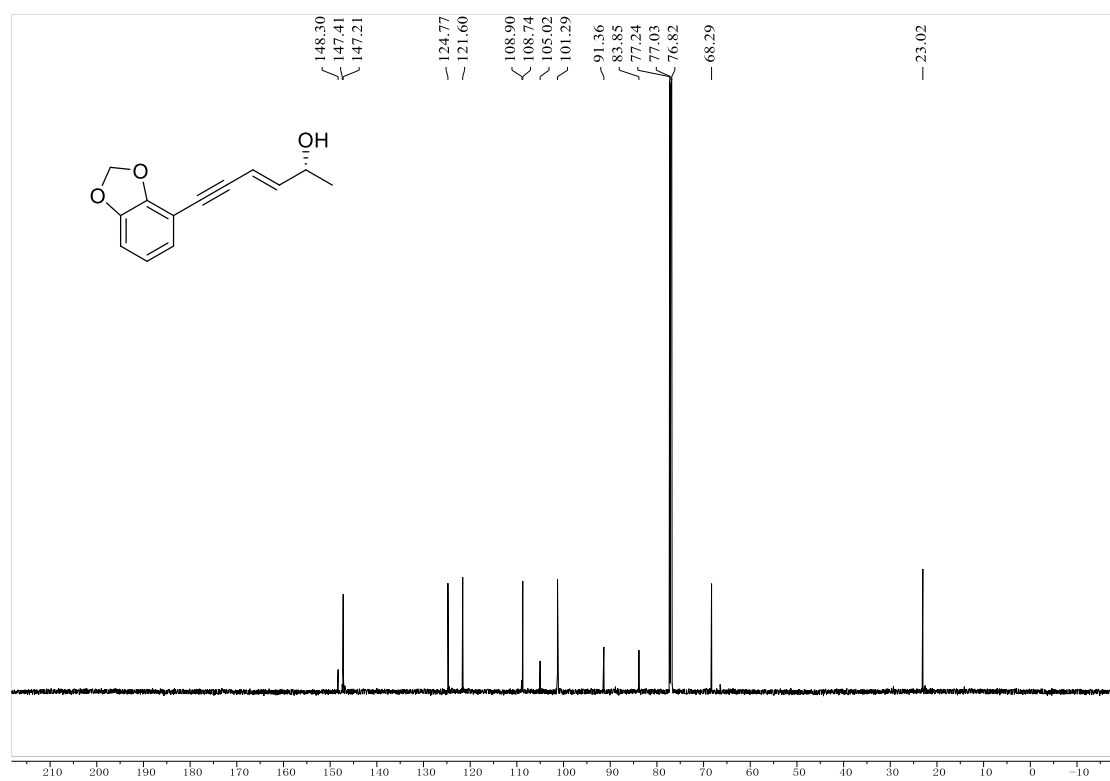

<sup>1</sup>H NMR spectra (400 MHz, CDCl<sub>3</sub>) of **2p**

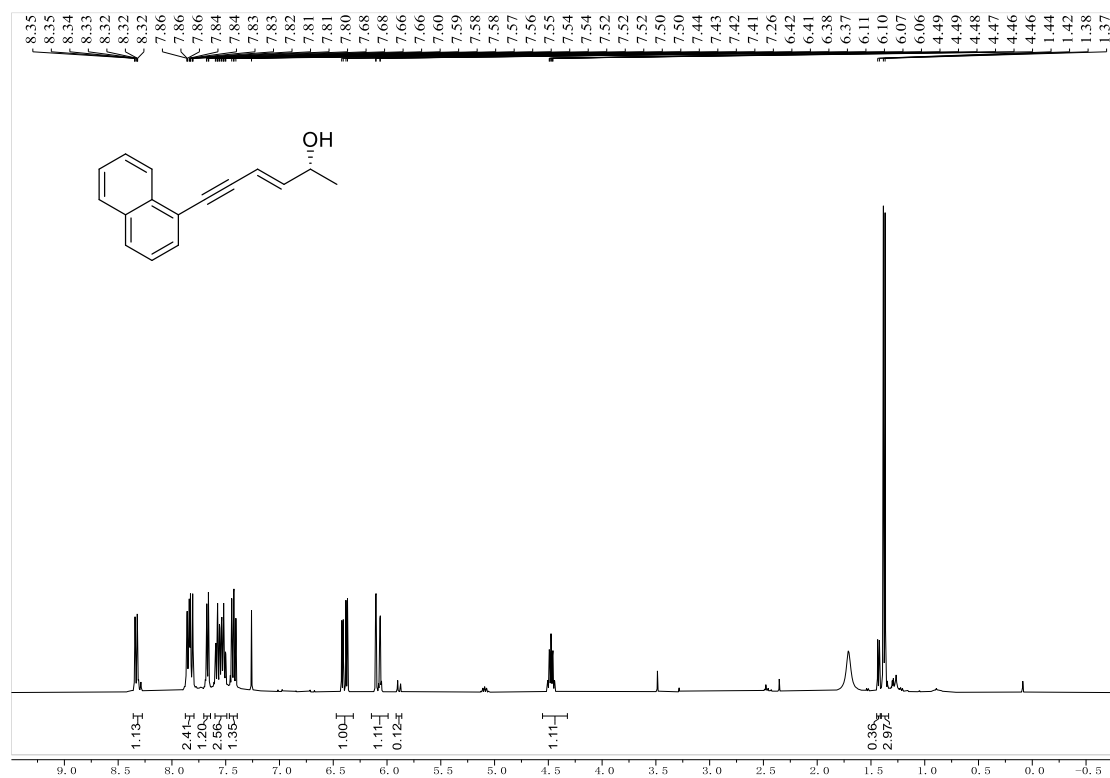

<sup>13</sup>C NMR spectra (101 MHz, CDCl<sub>3</sub>) of **2p**

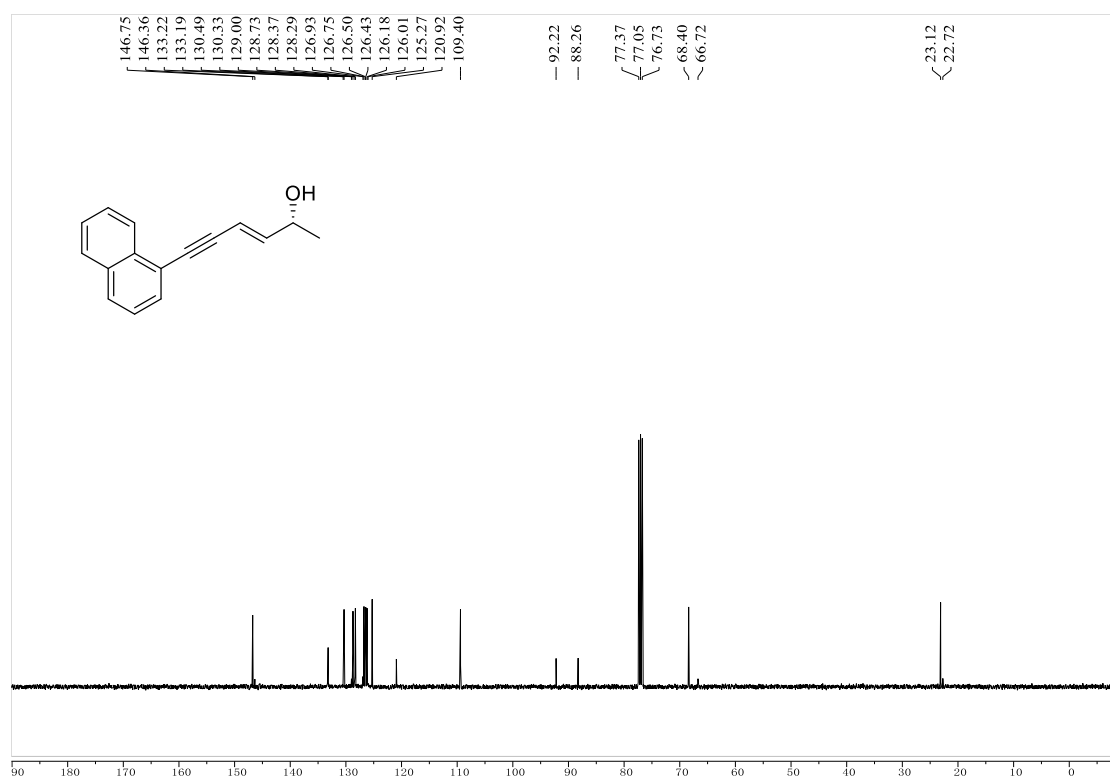

<sup>1</sup>H NMR spectra (600 MHz, CDCl<sub>3</sub>) of **2q**

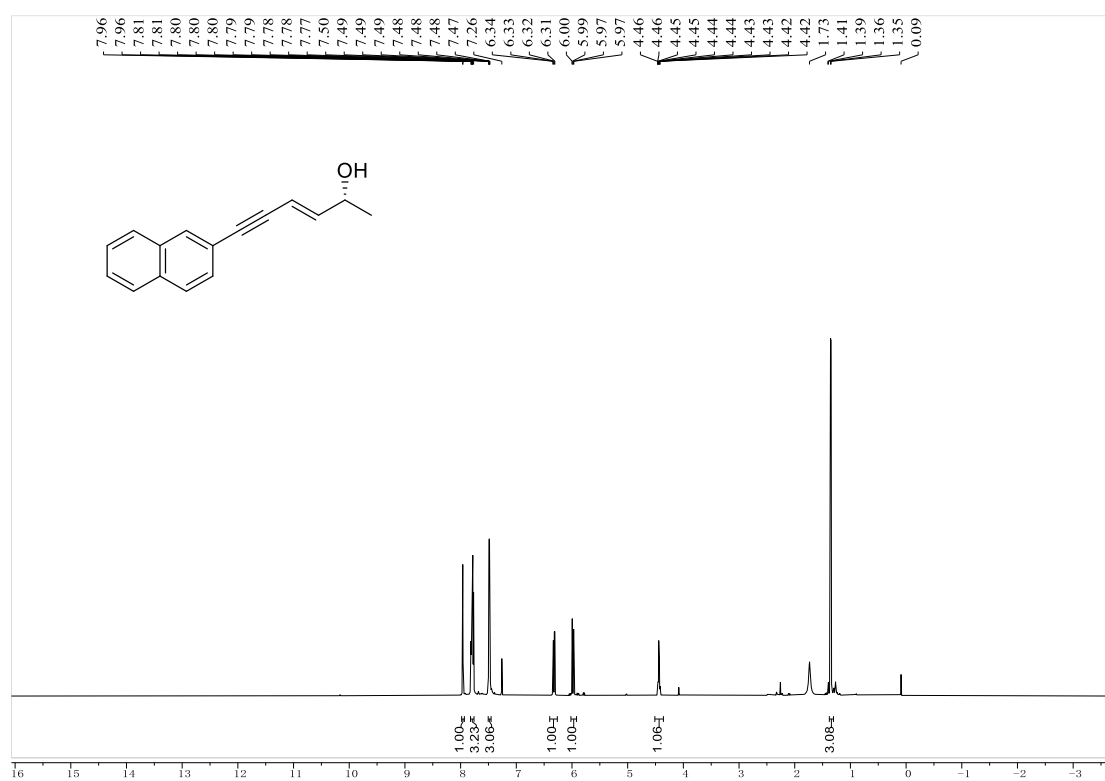

<sup>13</sup>C NMR spectra (151 MHz, CDCl<sub>3</sub>) of **2q**

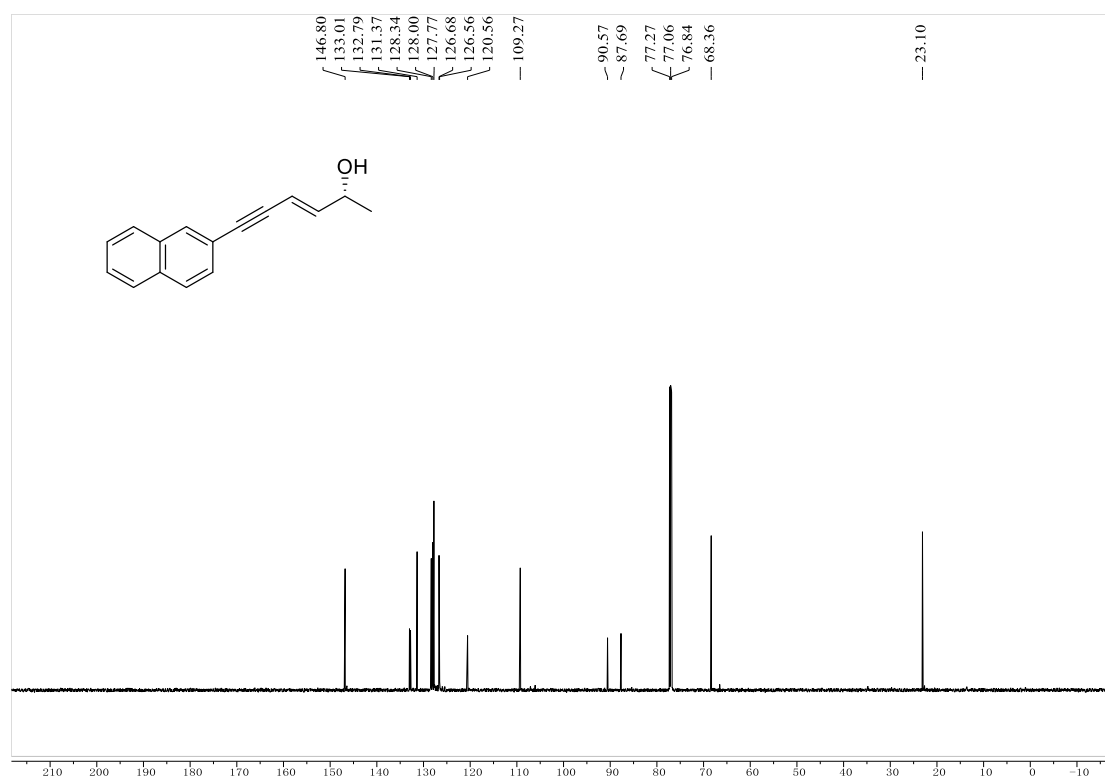

$^1\text{H}$  NMR spectra (600 MHz,  $\text{CDCl}_3$ ) of **2r**

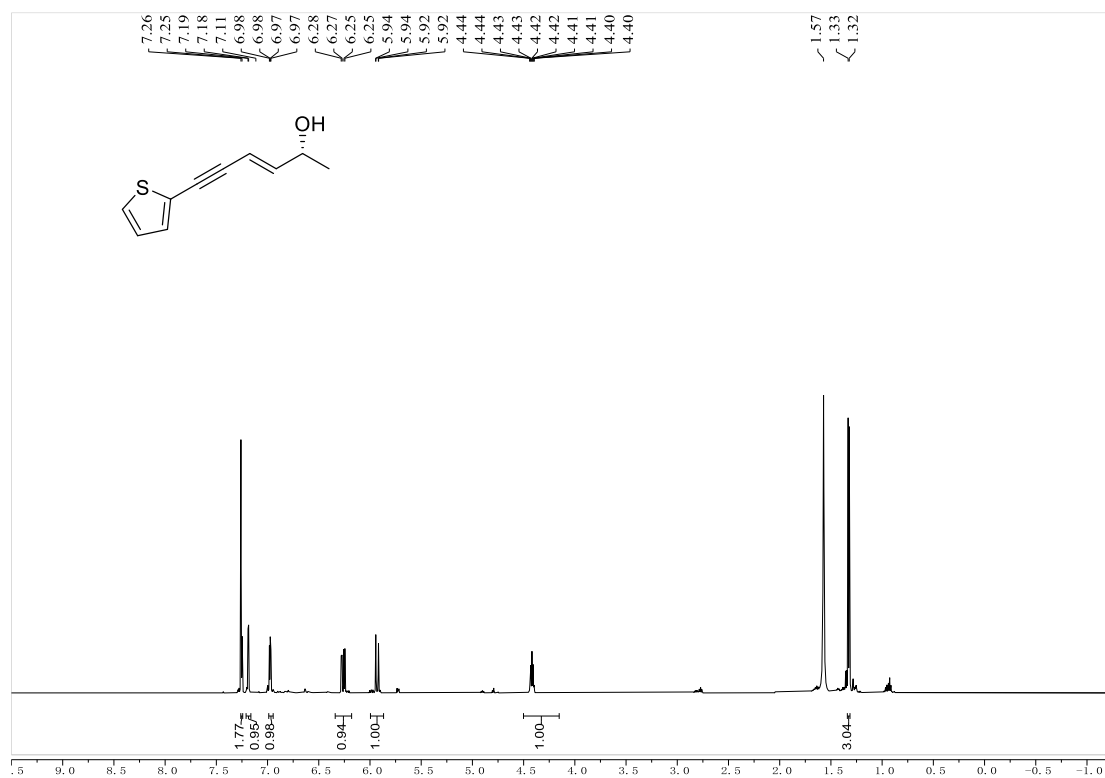

$^{13}\text{C}$  NMR spectra (151 MHz,  $\text{CDCl}_3$ ) of **2r**

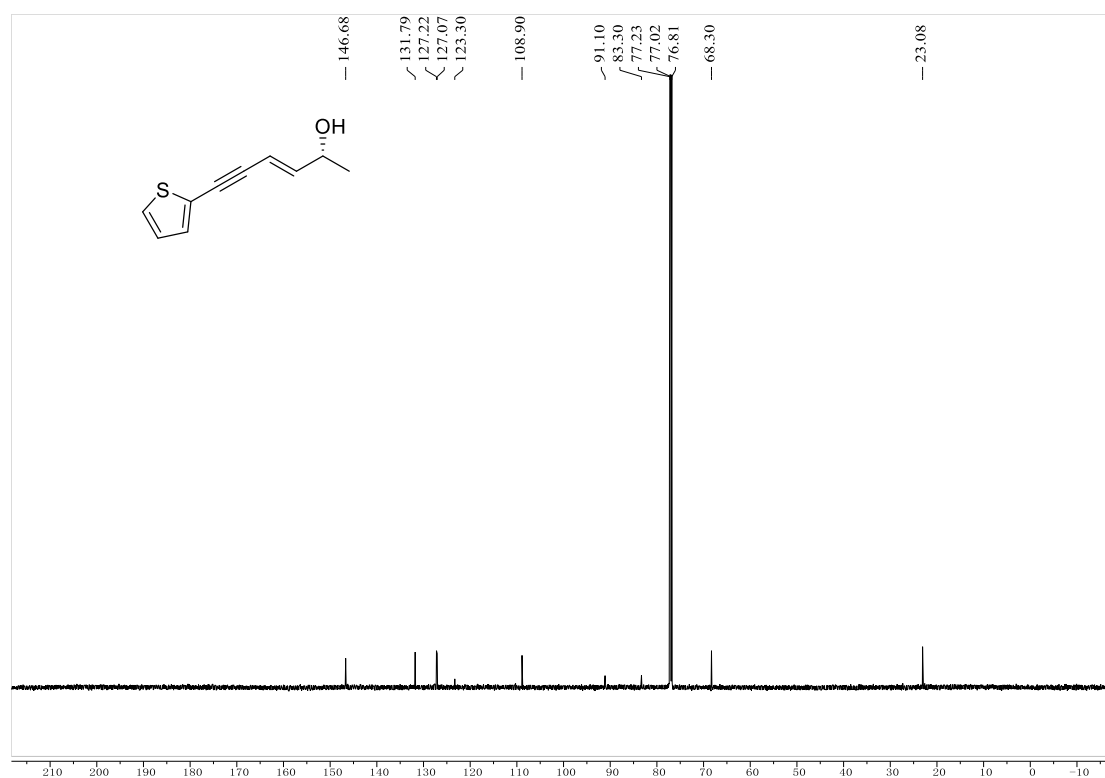



<sup>1</sup>H NMR spectra (600 MHz, CDCl<sub>3</sub>) of **2s**

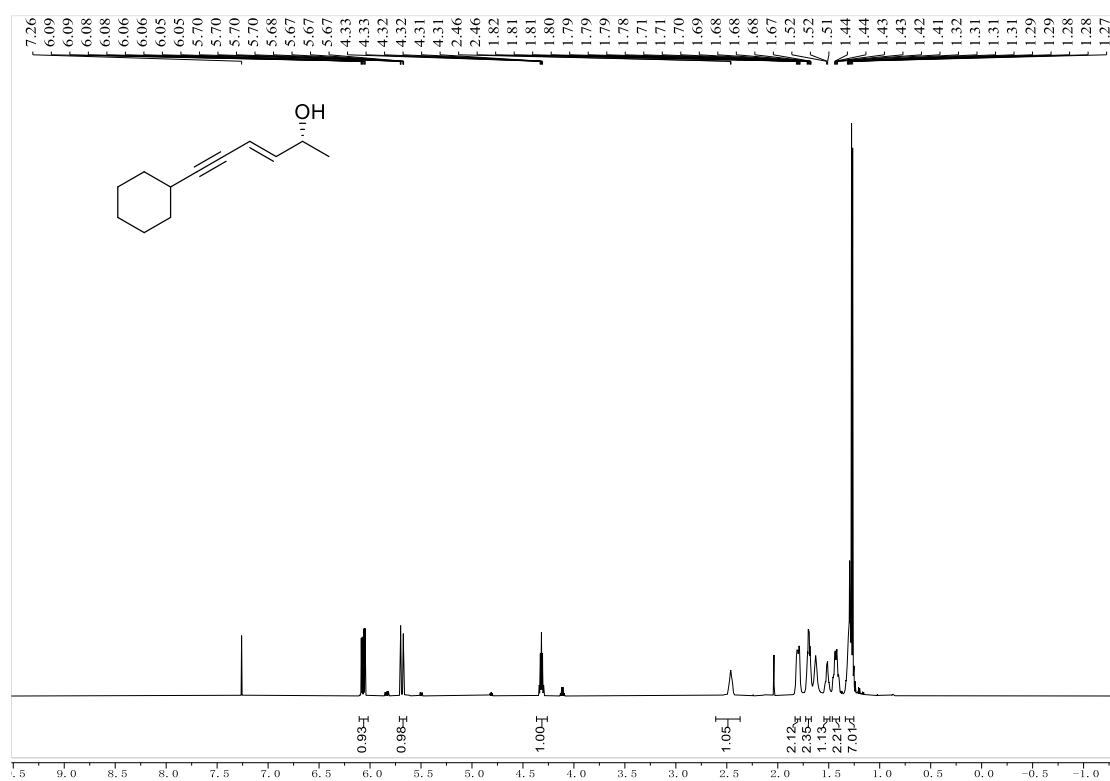

<sup>13</sup>C NMR spectra (151 MHz, CDCl<sub>3</sub>) of **2s**

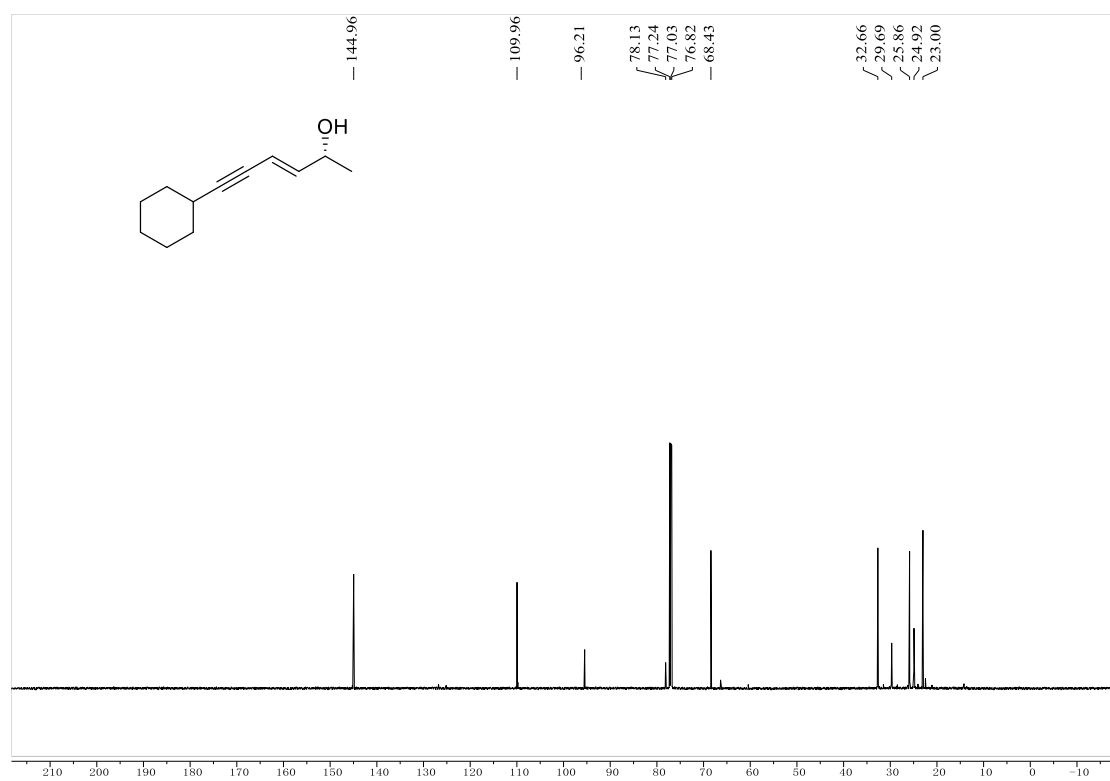

<sup>1</sup>H NMR spectra (600 MHz, CDCl<sub>3</sub>) of **2t**

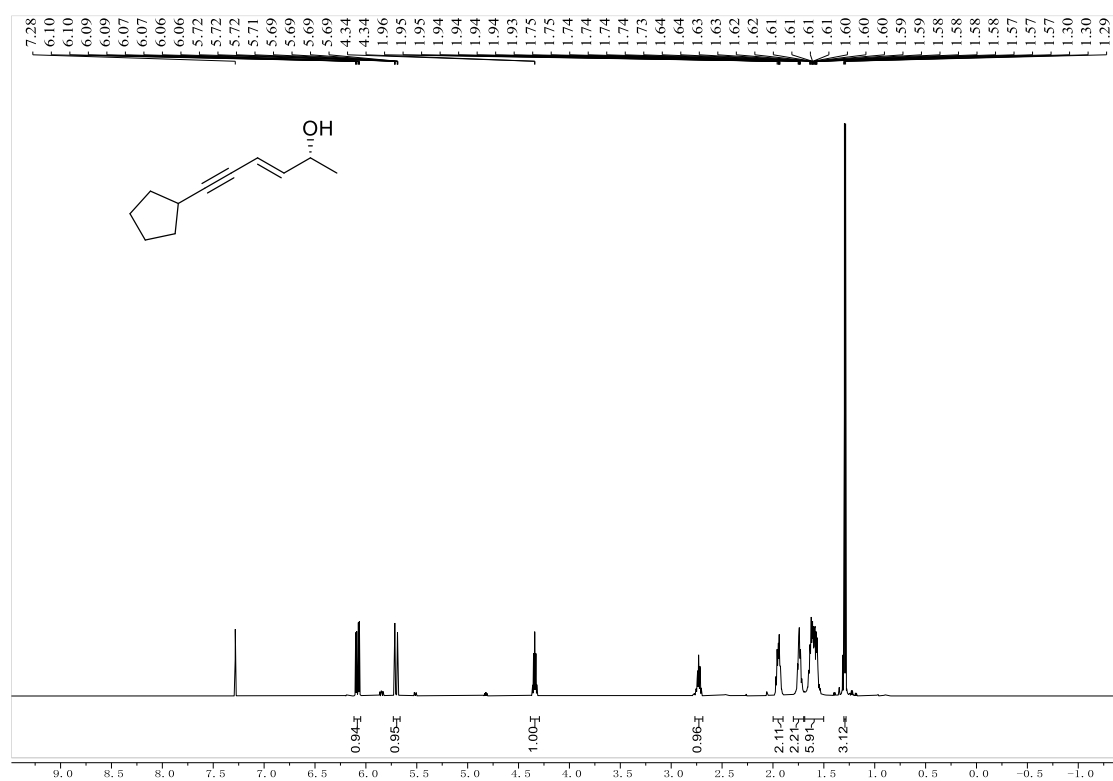

<sup>13</sup>C NMR spectra (151 MHz, CDCl<sub>3</sub>) of **2t**

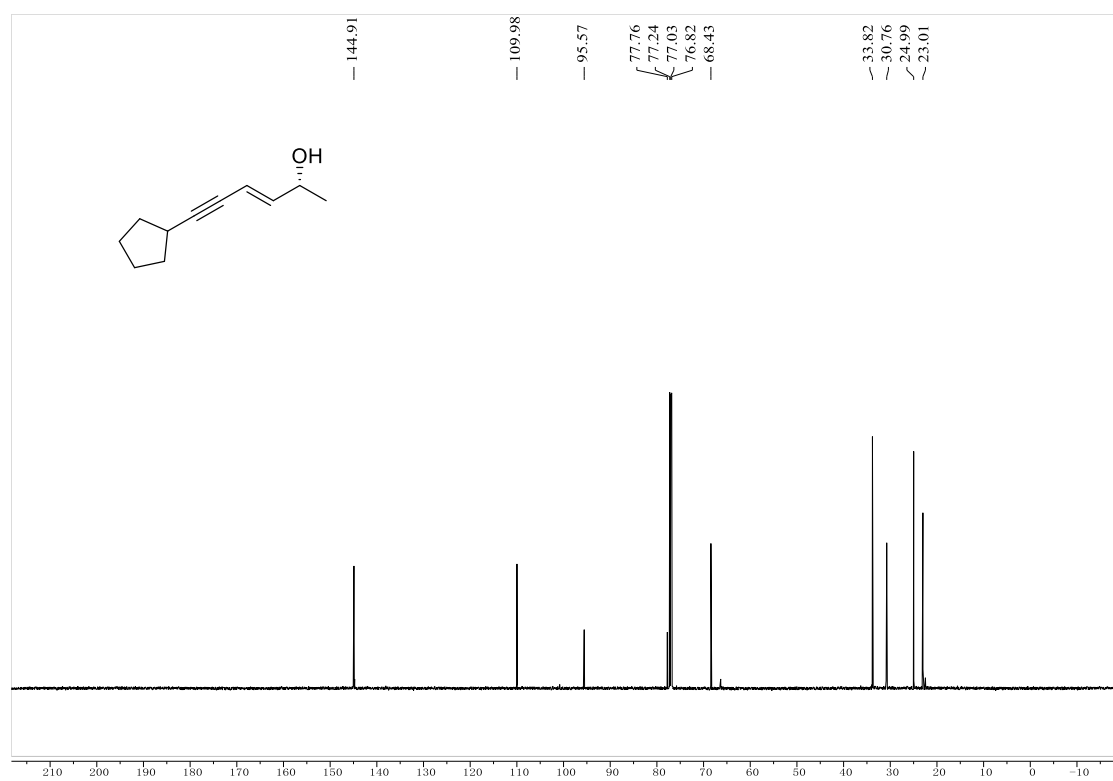

<sup>1</sup>H NMR spectra (600 MHz, CDCl<sub>3</sub>) of **2u**

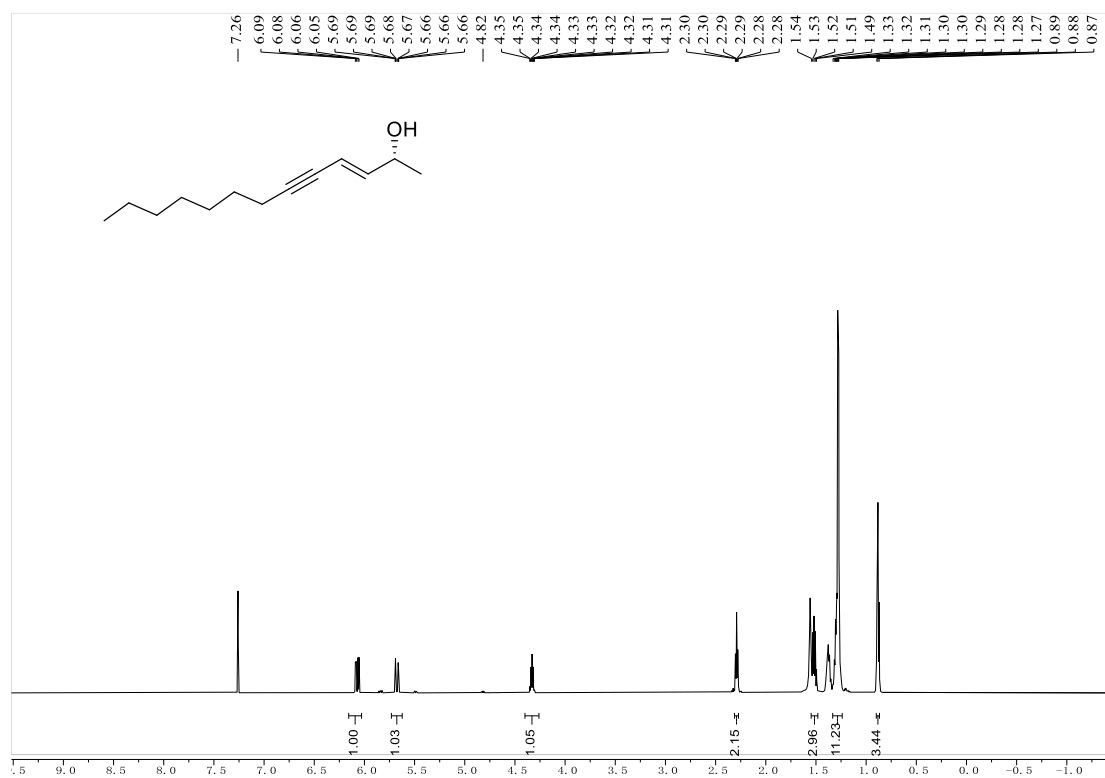

<sup>13</sup>C NMR spectra (151 MHz, CDCl<sub>3</sub>) of **2u**

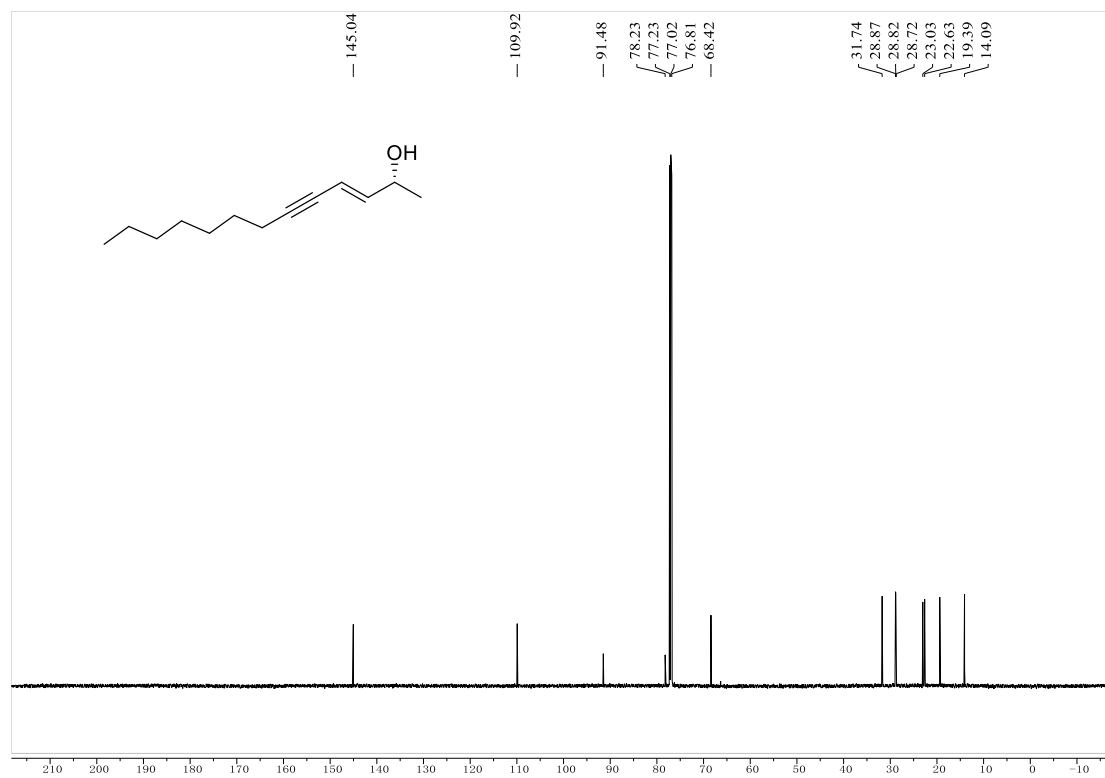

$^1\text{H}$  NMR spectra (600 MHz,  $\text{CDCl}_3$ ) of **2v**

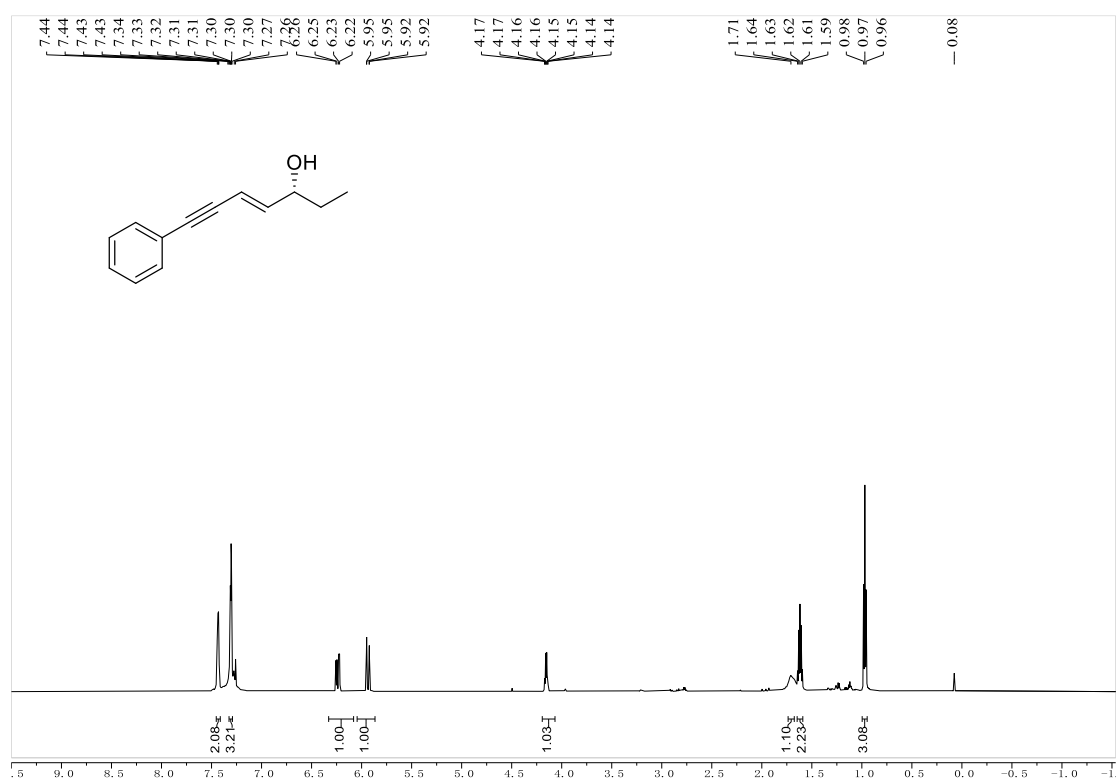

$^{13}\text{C}$  NMR spectra (151 MHz,  $\text{CDCl}_3$ ) of **2v**

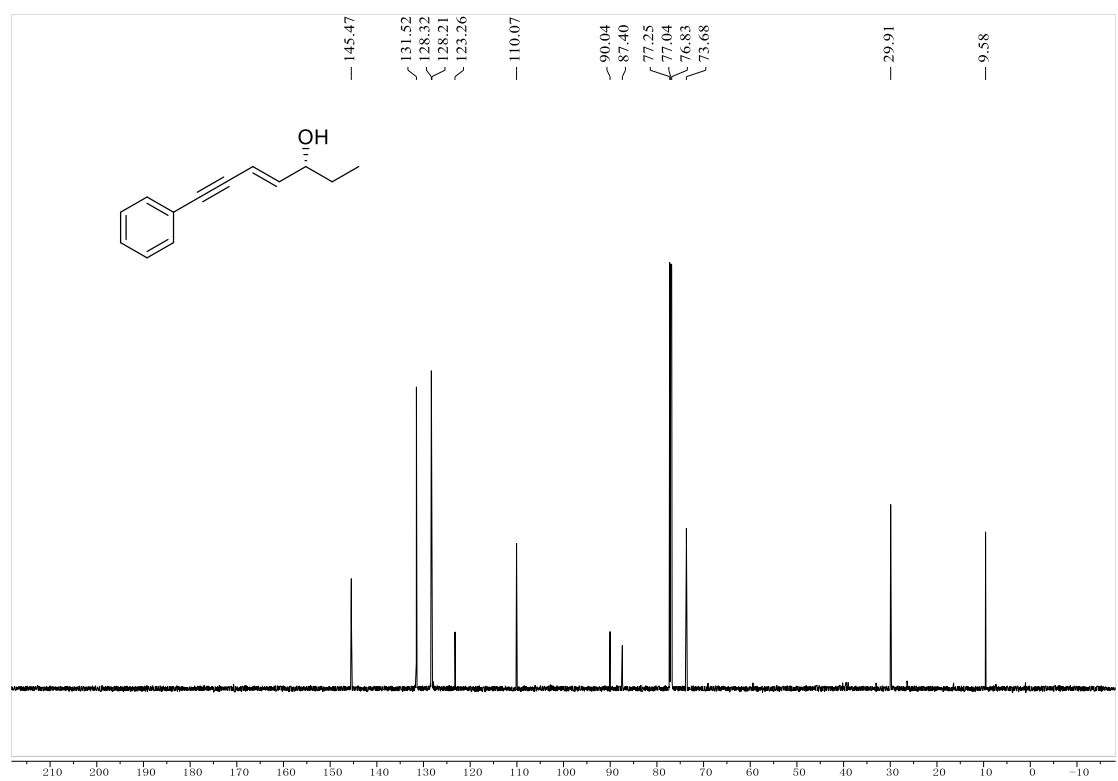

<sup>1</sup>H NMR spectra (600 MHz, CDCl<sub>3</sub>) of **2w**

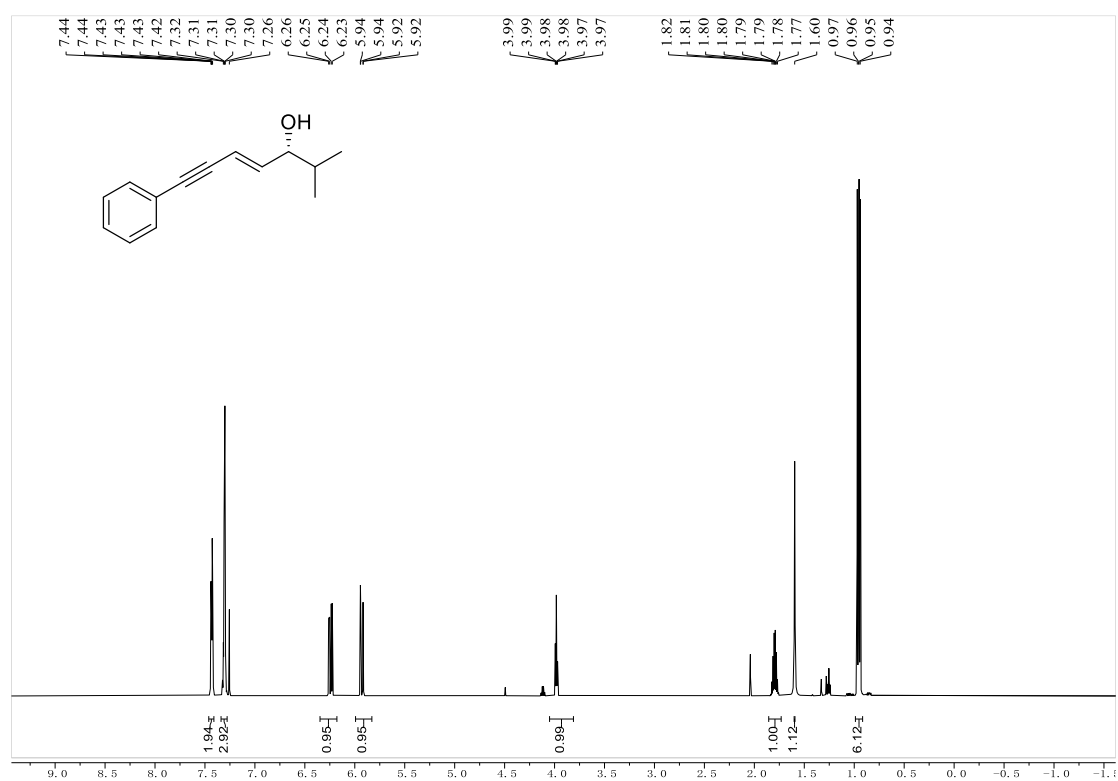

<sup>13</sup>C NMR spectra (151 MHz, CDCl<sub>3</sub>) of **2w**

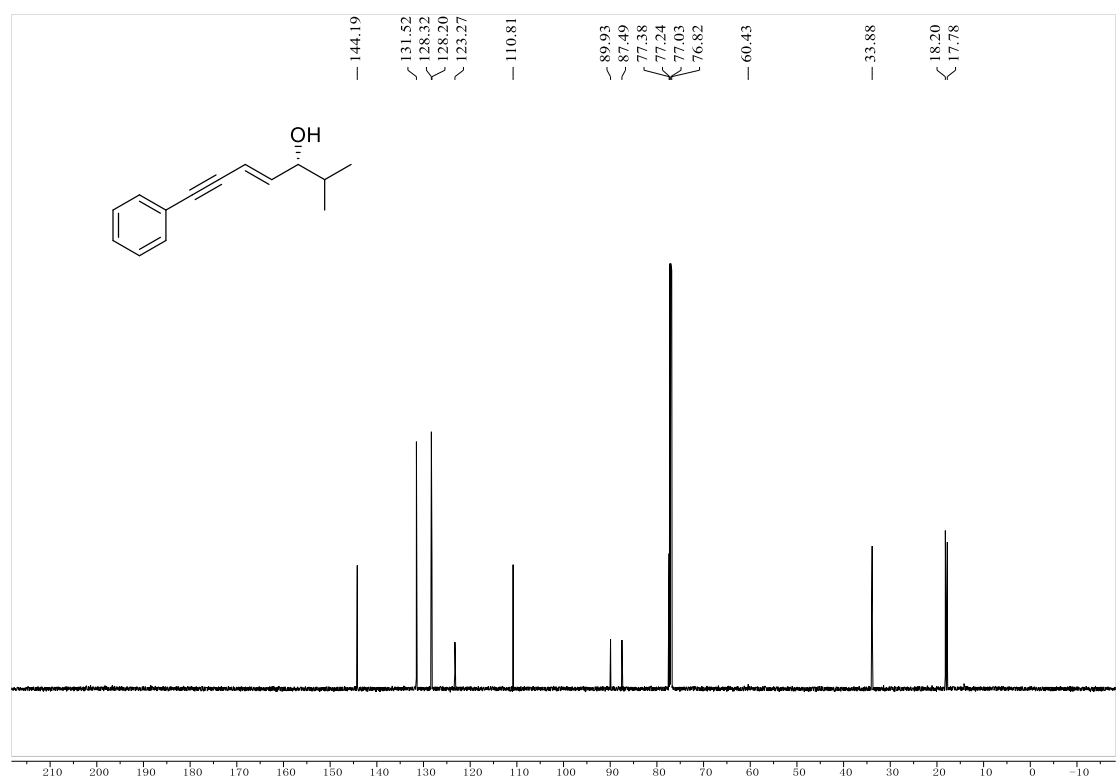

$^1\text{H}$  NMR (400 MHz,  $\text{CDCl}_3$ ) of **2x**

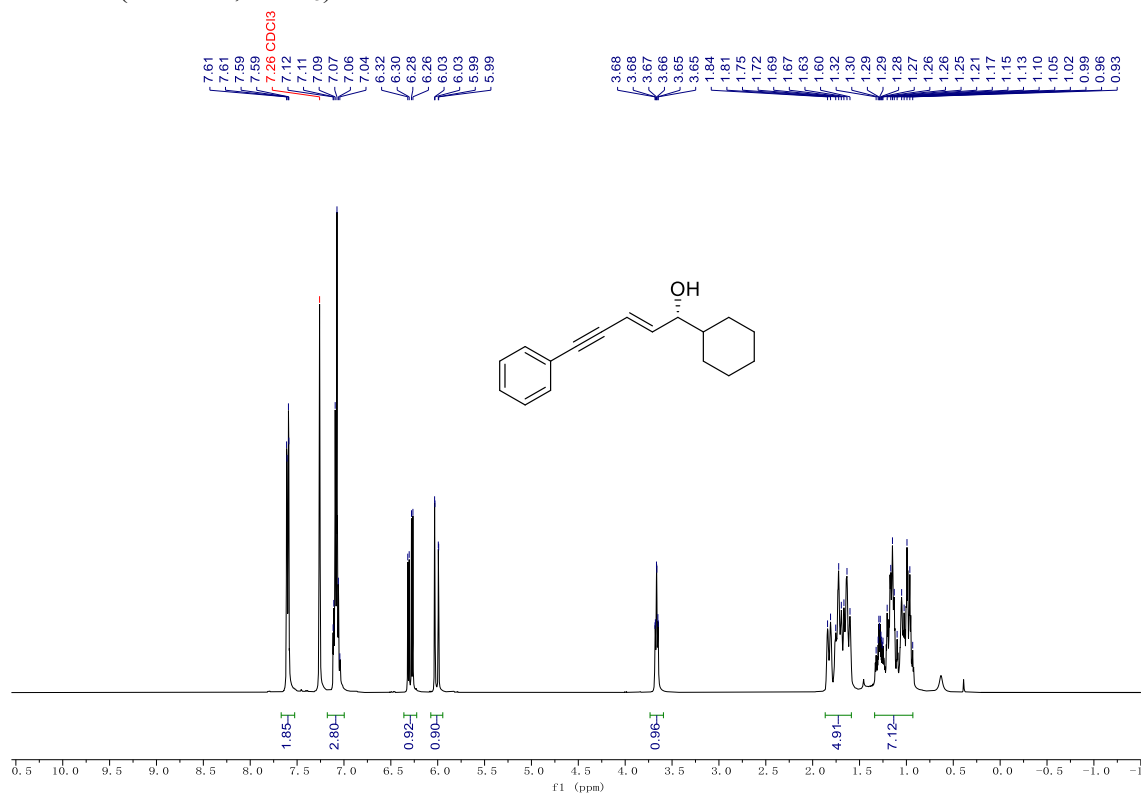

$^{13}\text{C}$  NMR (101 MHz,  $\text{CDCl}_3$ ) of **2x**

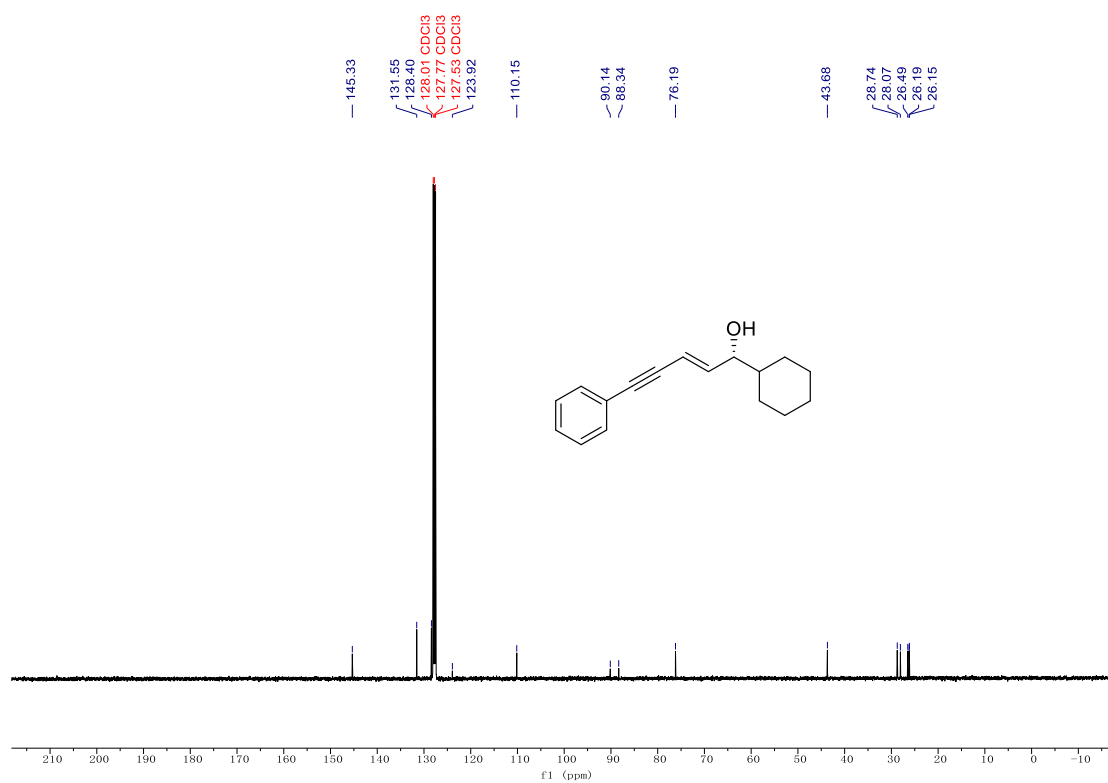

$^1\text{H}$  NMR (400 MHz,  $\text{CDCl}_3$ ) of **2y**

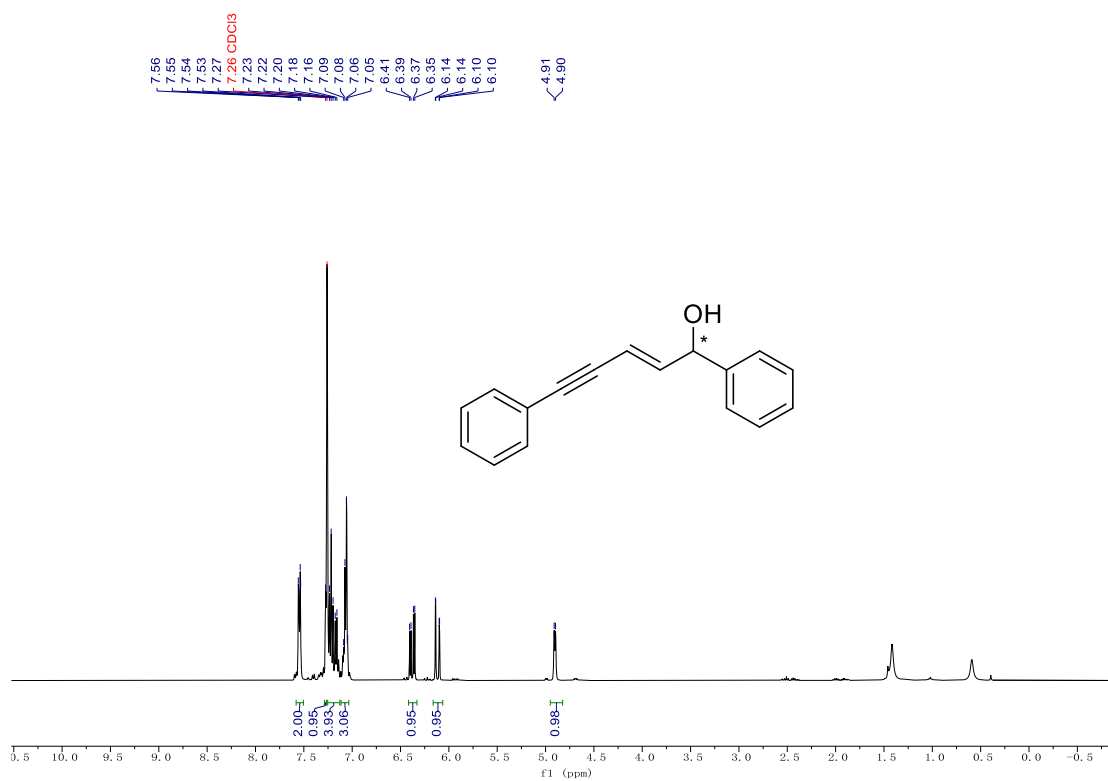

$^{13}\text{C}$  NMR (101 MHz,  $\text{CDCl}_3$ ) of **2y**

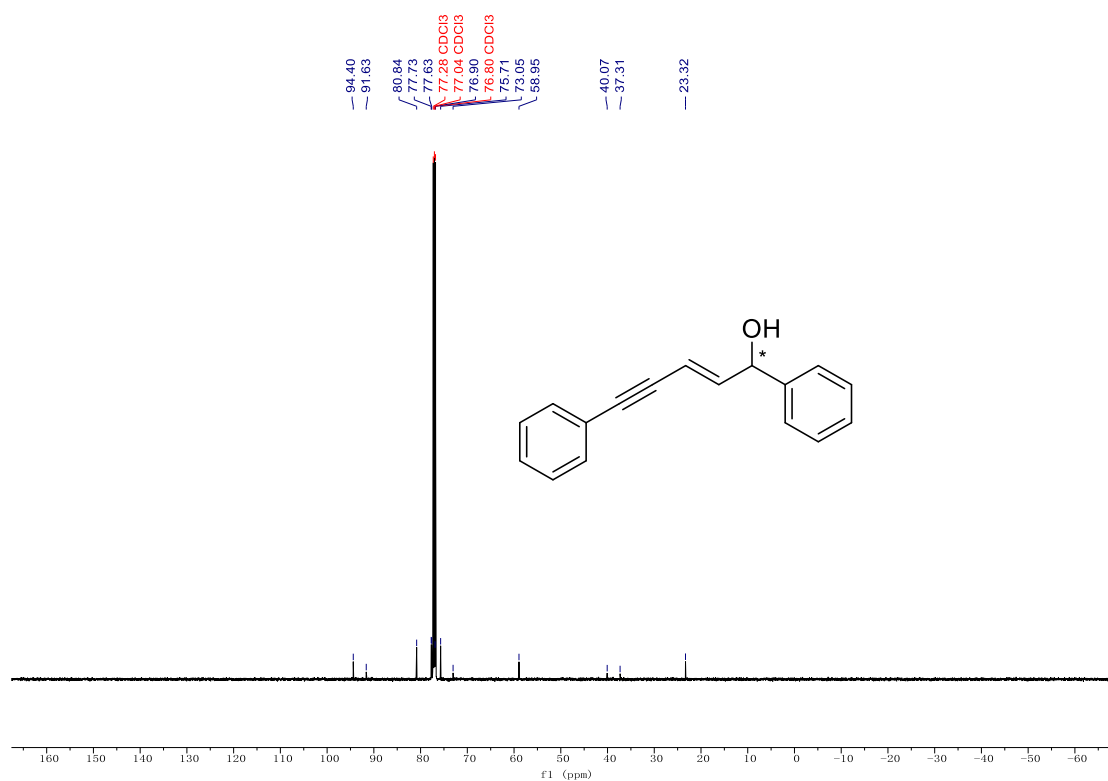

<sup>1</sup>H NMR spectra (600 MHz, CDCl<sub>3</sub>) of **2z**

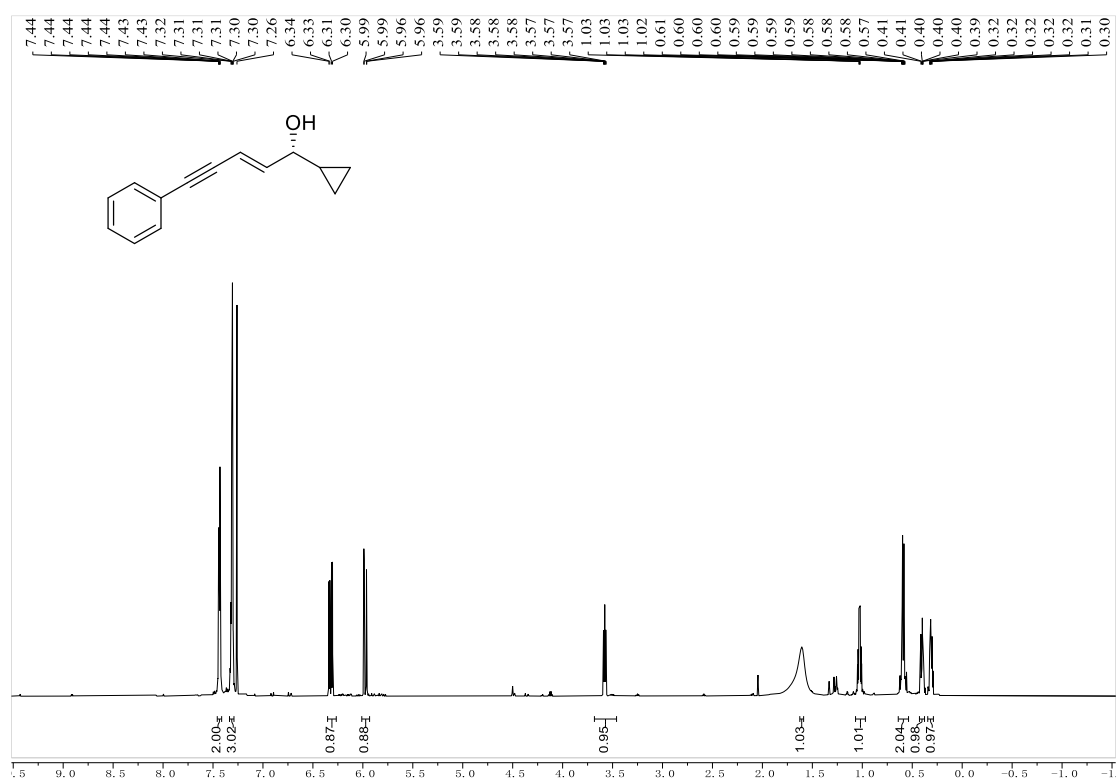

<sup>13</sup>C NMR spectra (151 MHz, CDCl<sub>3</sub>) of **2z**

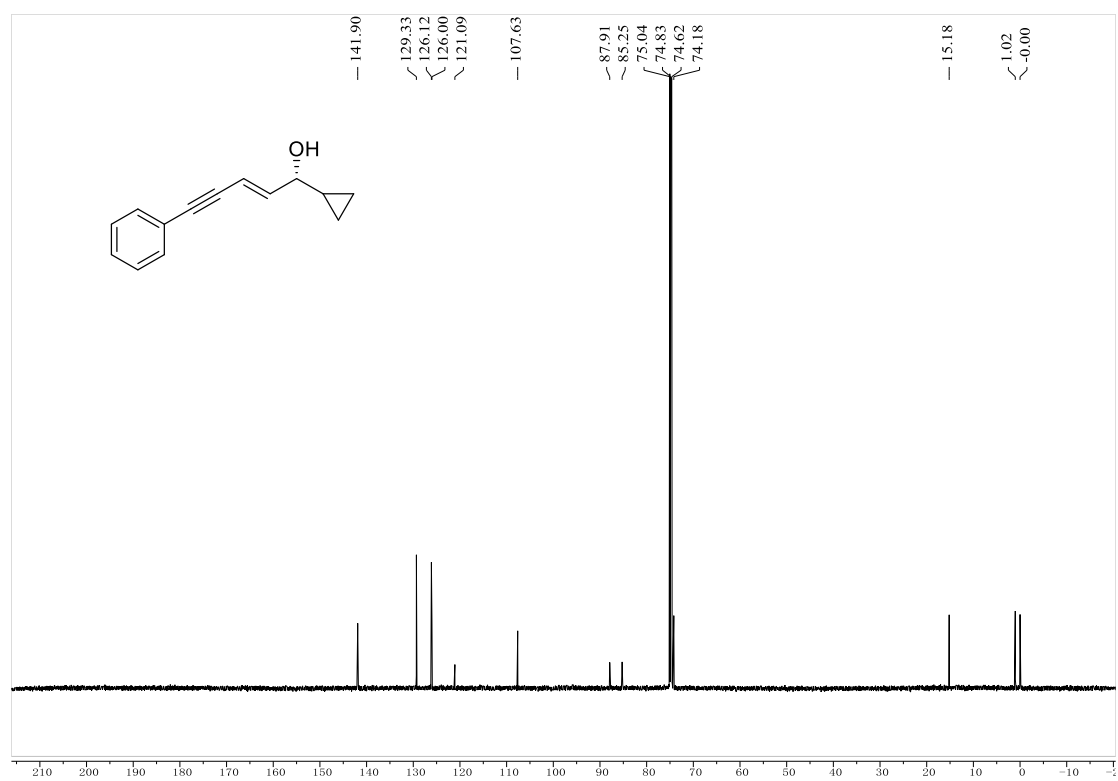



$^1\text{H}$  NMR spectra (600 MHz,  $\text{CDCl}_3$ ) of **2aa**

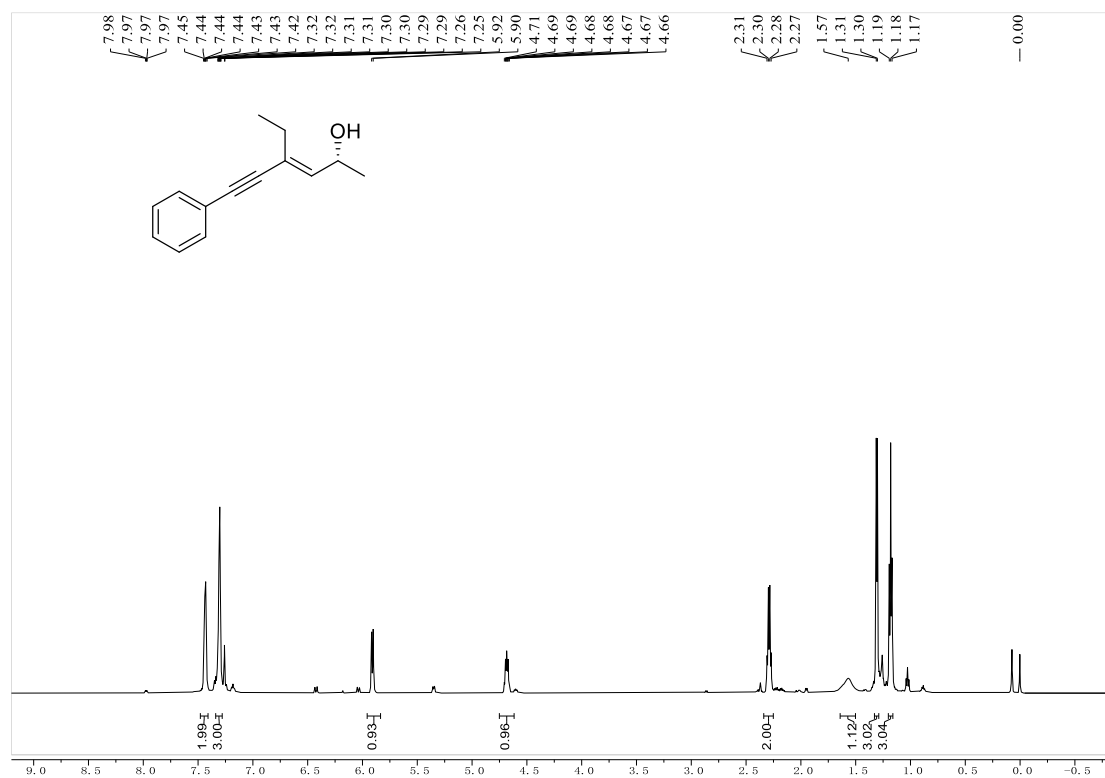

$^{13}\text{C}$  NMR spectra (151 MHz,  $\text{CDCl}_3$ ) of **2aa**

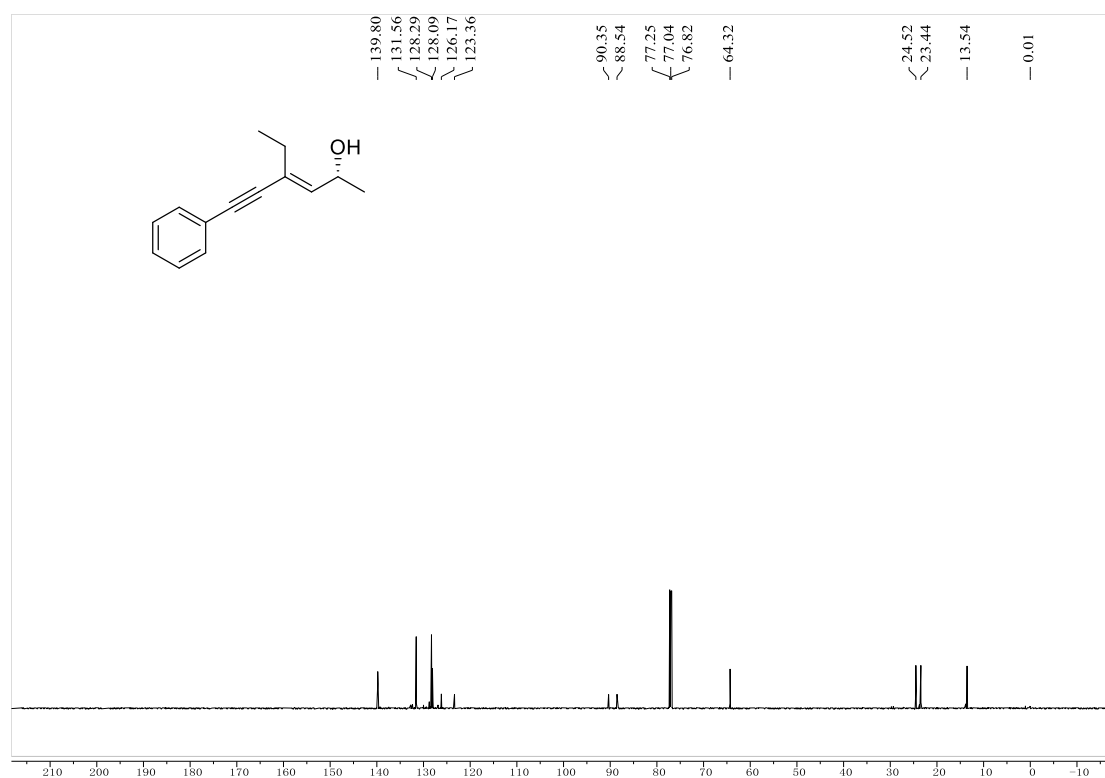

<sup>1</sup>H NMR spectra (600 MHz, CDCl<sub>3</sub>) of **3**

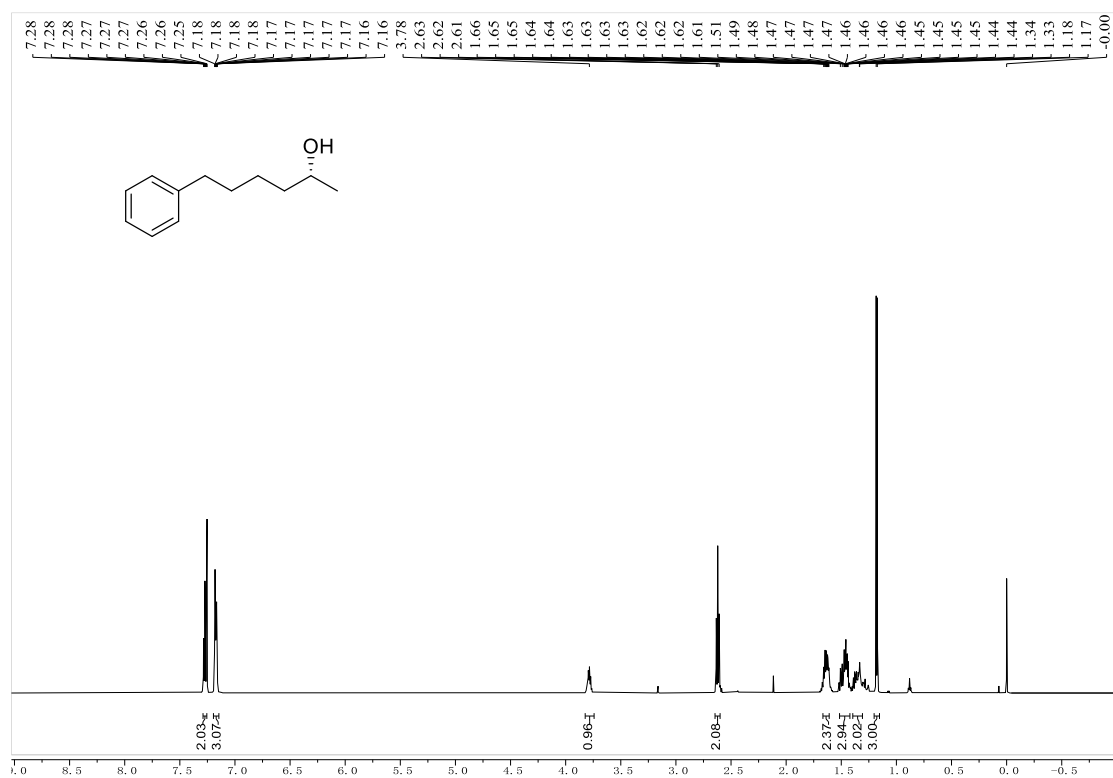

<sup>13</sup>C NMR spectra (151 MHz, CDCl<sub>3</sub>) of **3**

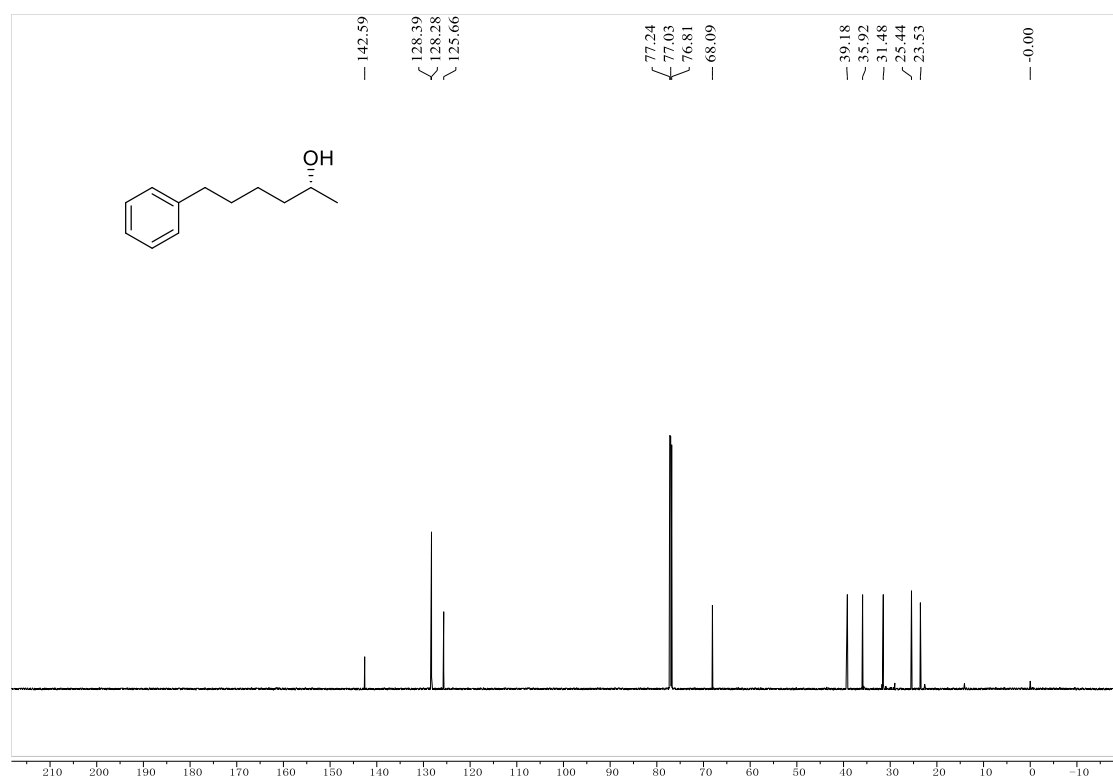

$^1\text{H}$  NMR spectra (600 MHz,  $\text{CDCl}_3$ ) of **4**

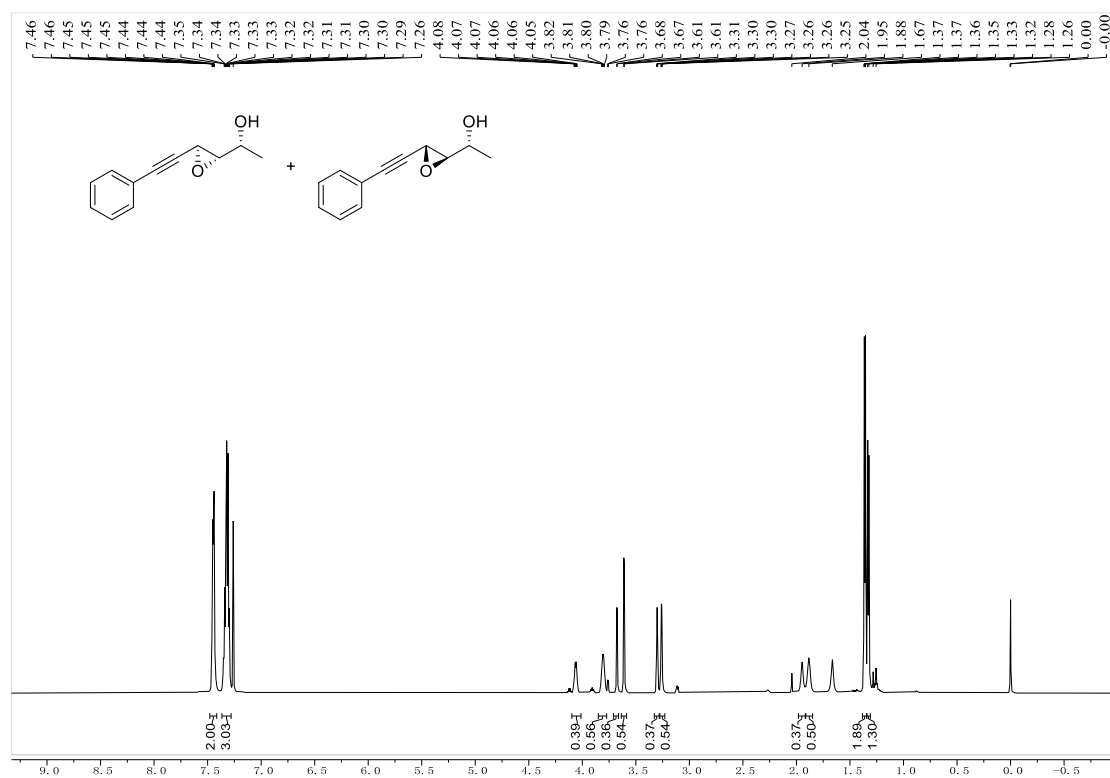

$^{13}\text{C}$  NMR spectra (151 MHz,  $\text{CDCl}_3$ ) of **4**

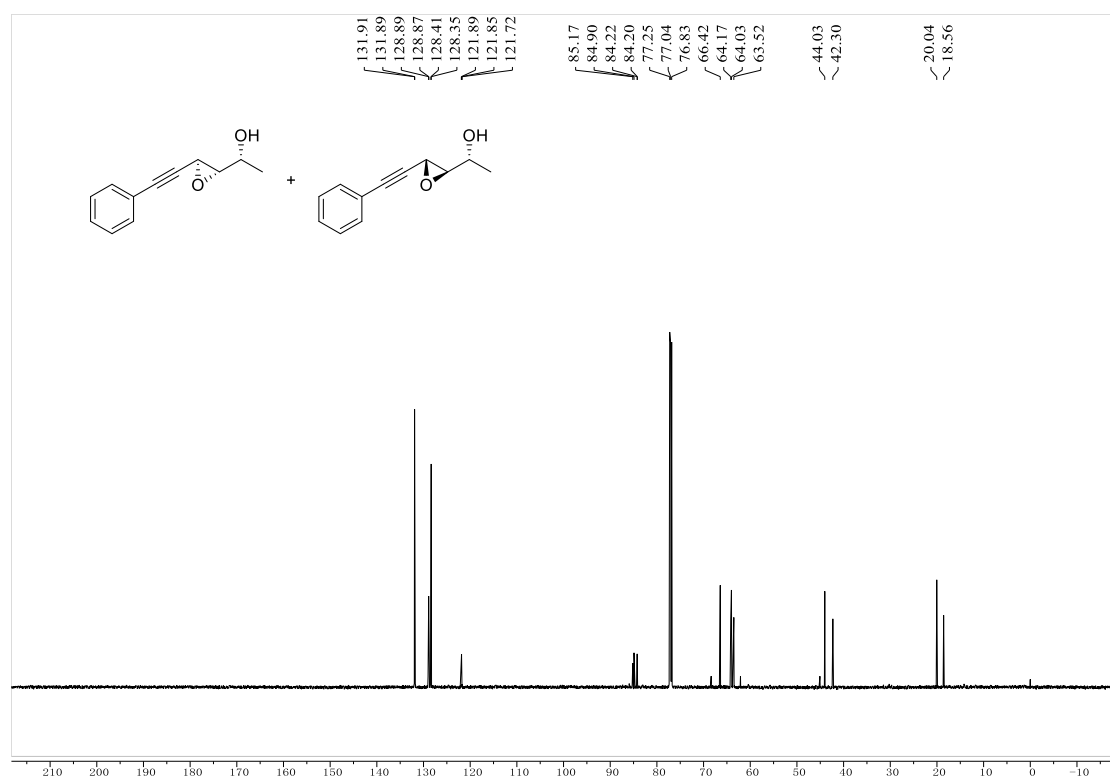

## VI. Reference:

1. "Combining silver catalysis and organocatalysis: a sequential Michael addition/hydroalkoxylation one-pot approach to annulated coumarins" Hack, D.; Chauhan, P.; Deckers, K.; Hermann, G. N.; Mertens, L.; Raabe, G.; Enders, D., *Org. Lett.* **2014**, *16*, 5188-91.
2. "Highly substituted tetrahydropyrones from hetero-Diels-Alder reactions of 2-alkenals with stereochemical induction from chiral dienes" Ruijter, E.; Schultingkemper, H.; Wessjohann, L. A., *J. Org. Chem.* **2005**, *70*, 2820-2823.
3. "Synthesis of Polysubstituted Pyridines via a One-Pot Metal-Free Strategy" Wei, H.; Li, Y.; Xiao, K.; Cheng, B.; Wang, H.; Hu, L.; Zhai, H., *Org. Lett.* **2015**, *17*, 5974-5977.
4. "Asymmetric synthesis of chiral beta-alkynyl carbonyl and sulfonyl derivatives via sequential palladium and copper catalysis" Trost, B. M.; Masters, J. T.; Taft, B. R.; Lumb, J. P., *Chem. Sci.* **2016**, *7*, 6217-6231.
5. "Synthesis of 4H-cyclopenta[c]furan-5(6H)-one derivatives" Tu, X.; Peng, H.; Deng, G., *Tetrahedron* **2020**, *76*, 131421.
6. "Multicomponent and Metal-Free Diels-Alder/Aromatization Approach to the Stereospecific Synthesis of E-(Hetero)Stilbenes and Diarylacetylenes" Ballarotto, M.; Cerra, B.; Temperini, A., *Eur. J. Org. Chem.* **2023**, *26*, e202300552.
7. "Conjugate addition-elimination in the reaction of  $\beta$ -1-alkynyl-9-borabicyclo[3.3.1]nonanes with 4-methoxy-3-buten-2-one and related derivatives. A convenient new route to conjugated enynones" Molander, G. A.; Brown, H. C., *J. Org. Chem.* **1977**, *42*, 3106.
8. "Remote stereocontrol" in organocopper chemistry: highly enantioselective synthesis of vinylallenes by 1,5-substitution of enyne acetates" Krause, N.; Purpura, M., *Angew. Chem., Int. Ed.* **2000**, *39*, 4355-4356.
9. "Rhodium-catalysed tetrahydro-Diels-Alder reactions of enediynes via a rhodium-stabilized cyclic allene" Thadkapally, S.; Farshadfar, K.; Drew, M. A.; Richardson, C.; Ariaferd, A.; Pyne, S. G.; Hyland, C. J. T., *Chem. Sci.* **2020**, *11*, 10945-10950.
10. "Modular Regiodivergent Synthesis of Benzo-Fused Isocoumarins by a Cyclopropane Aromatization Strategy" Bi, H.; Wang, S. R., *Org. Lett.* **2022**, *24*, 6316-6320.
11. "Thermostable Enzymes in Organic Synthesis, 4. Tbadh-Catalyzed Preparation of Bifunctional Chirons. Total Synthesis of S-(+)-Z-Tetradec-5-En-13-Olide" Keinan, E.; Seth, K. K.; Lamed, R.; Ghirlando, R.; Singh, S. P., *Biocatalysis* **2009**, *3*, 57-71.
12. "RuPHOX-Ru-Catalyzed Selective Asymmetric Hydrogenation of Exocyclic  $\alpha,\beta$ -Unsaturated Pentanones" Li, J.; Zhu, Y.; Lu, Y.; Wang, Y.; Liu, Y.; Liu, D.; Zhang, W., *Organometallics* **2019**, *38*, 3970-3978.
13. "Iridium-catalyzed chemoselective asymmetric hydrogenation of conjugated enones with ferrocene-based multidentate phosphine ligands" Ma, J.; Li, W.; He, L.; Lv, H., *Chem. Commun.* **2022**, *58*, 5841-5844.
